# Supplementary material
Source: PubMed Central journal article supplement (PMC6281782)
Supplement: NIHMS989415-supplement-Supplemental_Information.pdf [file NIHMS989415-supplement-Supplemental_Information.pdf]

**Translational studies support a role for serotonin 2B receptors in aggression-related  
cannabis response**

Janitza L. Montalvo-Ortiz, Ph.D.<sup>1</sup>, Hang Zhou, Ph.D.<sup>1</sup>, Ivana D'Andrea, Ph.D.<sup>2</sup>, Luc  
Maroteaux, Ph.D.<sup>2</sup>, Adriana Lori, Ph.D.<sup>3</sup>, Alicia Smith, Ph.D.<sup>3</sup>, Kerry J. Ressler, M.D.,  
Ph.D.<sup>4</sup>, Yaira Z. Nuñez B.A.<sup>1,5</sup>, Lindsay A. Farrer, Ph.D.<sup>6</sup>, Hongyu Zhao, Ph.D.<sup>7</sup>, Henry  
R. Kranzler, M.D.<sup>8</sup>, and Joel Gelernter, M.D.<sup>1,5\*</sup>

**\*Correspondence to:** [joel.gelernter@yale.edu](mailto:joel.gelernter@yale.edu)

Material and Methods

Results

Figures S1-S7

Table S1-S8

References (1-15)

## Supplementary Notes

### Materials and Methods

#### Genotyping and Quality Control

*Grady Trauma Project (GTP) sample:*

SNPweights software<sup>17</sup> was used to assign ancestry, focusing on African-American ancestry only. PLINK<sup>1</sup> was used to perform quality control analyses (e.g., to remove SNPs with a call rate < 95%); individuals with missingness > 2% or heterozygosity > |0.2|, those failing sex checks, and duplicates and relatives were also removed. We then removed SNPs with a call rate < 0.98, with differential missingness between cases and controls < 0.02 or significant deviation from Hardy-Weinberg proportions ( $p < 1 \times 10^{-6}$  in controls and  $p < 1 \times 10^{-10}$  in PTSD cases). Imputation to the 1000 Genomes phase 1 reference was performed within the PGC pipeline<sup>16</sup> using SHAPEIT for phasing<sup>21</sup> and IMPUTE2 for imputation.<sup>22</sup> Principal-component analysis (PCA) was conducted on high-quality SNPs with low LD passing filters and then used to remove outlier subjects.

*Analysis of possible variant function*

#### eQTL analysis using the Braineac Database

To investigate the effect of the GWS SNPs (*HTR2B* rs17440378 and *PSMD1* rs35750632) on gene expression level, we conducted an expression quantitative trait locus (eQTL) analysis using the Braineac database from the UK Brain Expression Consortium (UKBEC) ([www.braineac.org](http://www.braineac.org)). This database contains information collected from 10 brain regions of 134 neuropathologically normal individuals: cerebellar cortex,

frontal cortex, hippocampus, medulla, occipital cortex, putamen, substantia nigra, temporal cortex, thalamus, and intralocular white matter.

#### eQTL analysis using the GTEx Database

We also conducted an eQTL analysis for both *HTR2B* rs17440378 and *PSMD1* rs35750632 using the Genotype-Tissue Expression (GTEx) Project database. We performed a single-tissue eQTL analysis and a multi-tissue comparison between the variant of interest and the target gene. The data used for the analyses described here were obtained from the GTEx portal ([www.gtexportal.org](http://www.gtexportal.org))

#### Chromatin regulation analysis using HaploReg v4.1

We used HaploReg v4.1 (<http://archive.broadinstitute.org/mammals/haploreg/haploreg.php>) to explore chromatin states, protein binding, and regulatory motif alterations within the GWS SNPs (*HTR2B*\*rs17440378 and *PSMD1*\*rs35750632). This database contains 127 reference epigenomes from ENCODE 2012 and Roadmap Epigenomics. We used the following datasets: ChromHMM states corresponding to enhancer or promoter elements, from the 15-state core model and 25-state model incorporating imputed data; histone modification ChIP-seq peaks using the gappedPeak algorithm for H3K27ac, H3K9ac, H3K9me1, and H3K9me3; and DNase hypersensitivity data peaks using the narrowPeak algorithm. To examine the effect of GWS variants on regulatory motifs, we used the position weight matrix (PWM)-scanning process. For the analysis, we selected an LD threshold ( $r^2$ ) of 0.8 and used the AFR 1000G Phase 1 population for LD calculation.

### **Polygenic risk score analysis**

PRS analysis was conducted as previously reported<sup>2</sup>. Data were clumped by linkage disequilibrium with  $r^2 < 0.2$  in a 200 kb window. The PRS was calculated based on a set of top SNPs ( $P$ -values 0.00001, 0.0001, 0.001, 0.005, 0.01, 0.05, 0.1, and 0.5) and multiplying the dosage of the risk alleles weighted by the effect sizes. The association between CRA and the PRS of each individual was analyzed in a logistic regression model embedded in GEE to correct for correlations among related individuals: CRA ~ PRS + age + sex + 3 PCs. The Yale-Penn 1 and Yale-Penn 2 datasets were analyzed separately and then combined by meta-analysis using METAL software.  $P$ -values smaller than 0.01 (0.05/5) were considered significant after multiple correction.

### ***Htr2b* knockout mice, THC administration and behavioral phenotyping**

Aggressive behavior was investigated using the resident-intruder test adapted from Koolhaas and colleagues<sup>3</sup> and performed 1 hour after i.p. injection. Briefly, experimental mice were put in isolation for 10 days to induce aggression. An unfamiliar mouse of the same sex and strain, used as an intruder, was introduced in the cage for 30 minutes. Intruders were balanced based on the total number of encounters, so that each experimental resident mouse was not exposed to the same intruder. The behavioral parameters scored for both frequency and duration included: 1) social investigation behavior (anogenital sniff, nose sniff, body sniff, allogrooming), 2) aggressive behavior (aggressive grooming, offensive posture, attack, tail rattling, and digging), 3) locomotor activity (number of crossings).

## Results

Manhattan plots are shown in Supplementary Figure 1. To determine whether both GWS SNPs reflect the same association signal, we conducted a conditional analysis by adjusting each for the other GWS variant. Adjusting for one variant in the conditional analysis eliminated the association for the other ( $P_{\text{conditional}} = 0.34$  for rs17440378;  $P_{\text{conditional}} = 0.23$  for rs35750632).

### Post-hoc analysis of association between *HTR2B*\*rs17440378 and aggression or substance-dependence traits

To investigate the specificity of the SNP association with CRA, we examined the association of *HTR2B*\*rs17440378 with other aggression-related and substance dependence traits (lower panel, Supplementary Figure 4). No association was observed for an aggression-related disorder or substance dependence. We also tested the association of *HTR2B*\*rs17440378 with aggression under the influence of other drugs, such as alcohol, cocaine, and opioids; there was no significant association found.

### eQTLs analysis using the Braineac Database

Using the Braineac Database, we identified several rs17440378 eQTLs for *HTR2B* across all 10 of the brain regions analyzed (exprID = 2603401, aveALL  $p = 7.3 \times 10^{-4}$ ) (Supplementary Table 4). The highest expression of *HTR2B* (exprID = 2603401) is in the medulla ( $n = 119$ ) and substantia nigra ( $n = 101$ ) (Supplementary Figure 5). eQTLs for *HTR2B*\*rs17440378 were also identified at genes across multiple brain regions: *PSMD1*,

*DIS3L2*, *SP140*, *B3GNT7* (Supplementary Table 4). No eQTLs were identified for rs35750632 in any of the brain regions examined.

#### *eQTLs analysis using the GTEx Database*

We used the GTEx database to identify additional eQTLs for *HTR2B*\*rs17440378 from 8,232 human samples in multiple tissues. We found 19 eQTLs for *HTR2B*\*rs17440378 in *HTR2B*, *C2orf72*, *ARMC9*, *RP11-223I10.1*, *AC017104.6*, and *B3GNT7* (Supplementary Table 5). The most significant result was the eQTL in *C2orf72* ( $p = 3.8 \times 10^{-18}$ , Effect size = 1.0). A multi-tissue eQTL comparison analysis between *C2orf72* and *HTR2B*\*rs17440378 eQTL showed a suggestive association in the putamen ( $n = 82$ ,  $\beta = 0.28$ ,  $p = 1.0 \times 10^{-2}$ ) and in peripheral tissues (Supplementary Figure 6). A multi-tissue eQTL comparison between *HTR2B* and *HTR2B*\*rs17440378 revealed associations in the cerebellum ( $n = 103$ ,  $\beta = -0.37$ ,  $p = 5.0 \times 10^{-2}$ ) and in peripheral tissue (Supplementary Figure 7). No eQTLs for rs35750632 were identified in any tissue.

#### *Chromatin regulation analysis using HaploReg v4.1*

We used HaploReg v4.1 to examine the regulatory role of GWS SNPs and variants with  $r^2 > 0.8$ . For *HTR2B*\*rs17440378, we identified multiple enhancer histone marks in embryonic stem cells (ESC), induced pluripotent stem cells (iPSC) and the anterior caudate and cingulate gyrus, among other tissues (Supplementary Table 6). Several regulatory motifs are altered by rs17440378, including Gfi-1, Nkx2-6, and Nkx3-4 (Supplementary Table 7A). Another variant in high LD with rs17440378 ( $r^2 = 0.85$ ,  $D' = 0.96$ ), rs55637820, showed several enhancer histone marks in gastrointestinal tissue,

pancreatic tissue, brain tissue (anterior caudate); it also alters 11 regulatory motifs (Supplementary Table 7B).

For rs35750632, we identified two promoter histone marks in gastrointestinal tissue and enhancer histone marks in epithelial tissue, adipose tissue, gastrointestinal tissue, and blood cells. Twelve regulatory motifs were altered by this genetic variant (Supplementary Table 7C).

## References

1. Purcell S, Neale B, Todd-Brown K, Thomas L, Ferreira MA, Bender D, et al. PLINK: a tool set for whole-genome association and population-based linkage analyses. *American journal of human genetics*. 2007;81(3):559-575.
2. International Schizophrenia C, Purcell SM, Wray NR, Stone JL, Visscher PM, O'Donovan MC, et al. Common polygenic variation contributes to risk of schizophrenia and bipolar disorder. *Nature*. 2009;460(7256):748-752.
3. Koolhaas JM, Coppens CM, de Boer SF, Buwalda B, Meerlo P, Timmermans PJ. The resident-intruder paradigm: a standardized test for aggression, violence and social stress. *Journal of visualized experiments : JoVE*. 2013(77):e4367.



**Figure S1. Manhattan plots from cannabis-related aggression genome-wide association study.**

**AA**

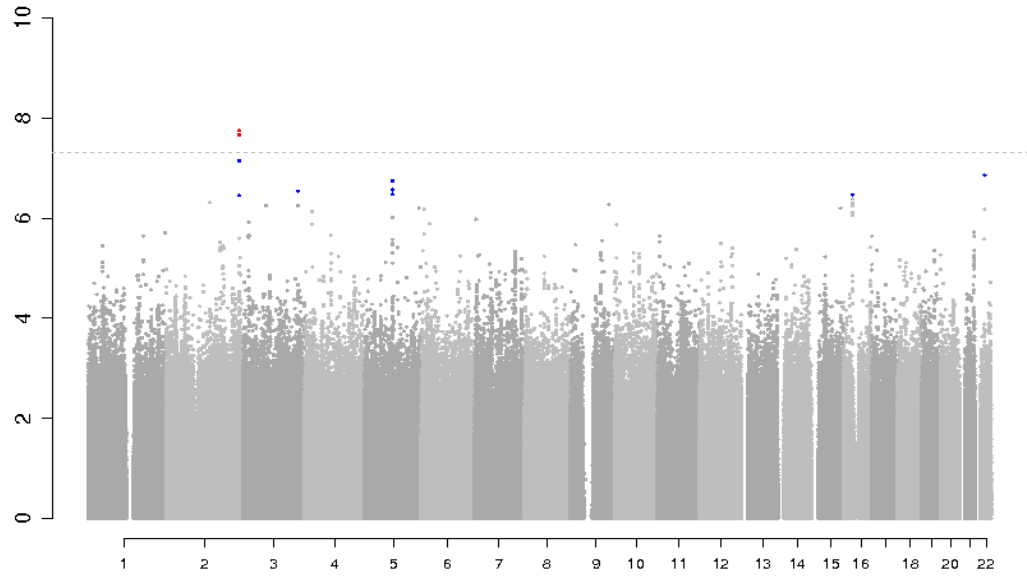

**EA**

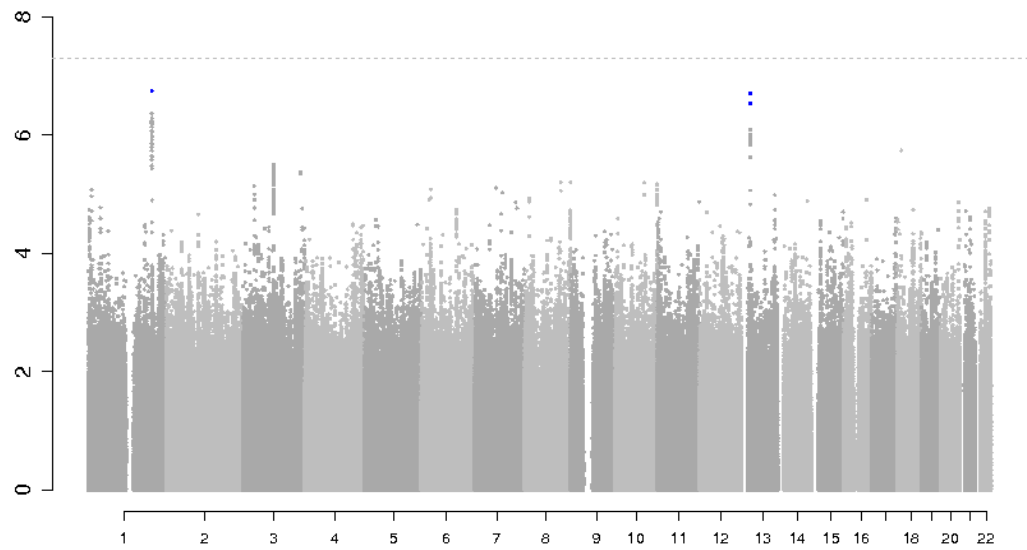

African Americans (AAs) and European Americans (EAs). Y-axis shows  $-\log_{10}(P\text{-value})$  and x-axis the 22 chromosomes. Each dot represents a SNP. Dotted line depicts  $P$  value cutoff of  $5.0 \times 10^{-8}$ .

Figure S2. QQ plot from genome-wide association study (GWAS) in African Americans (AAs).

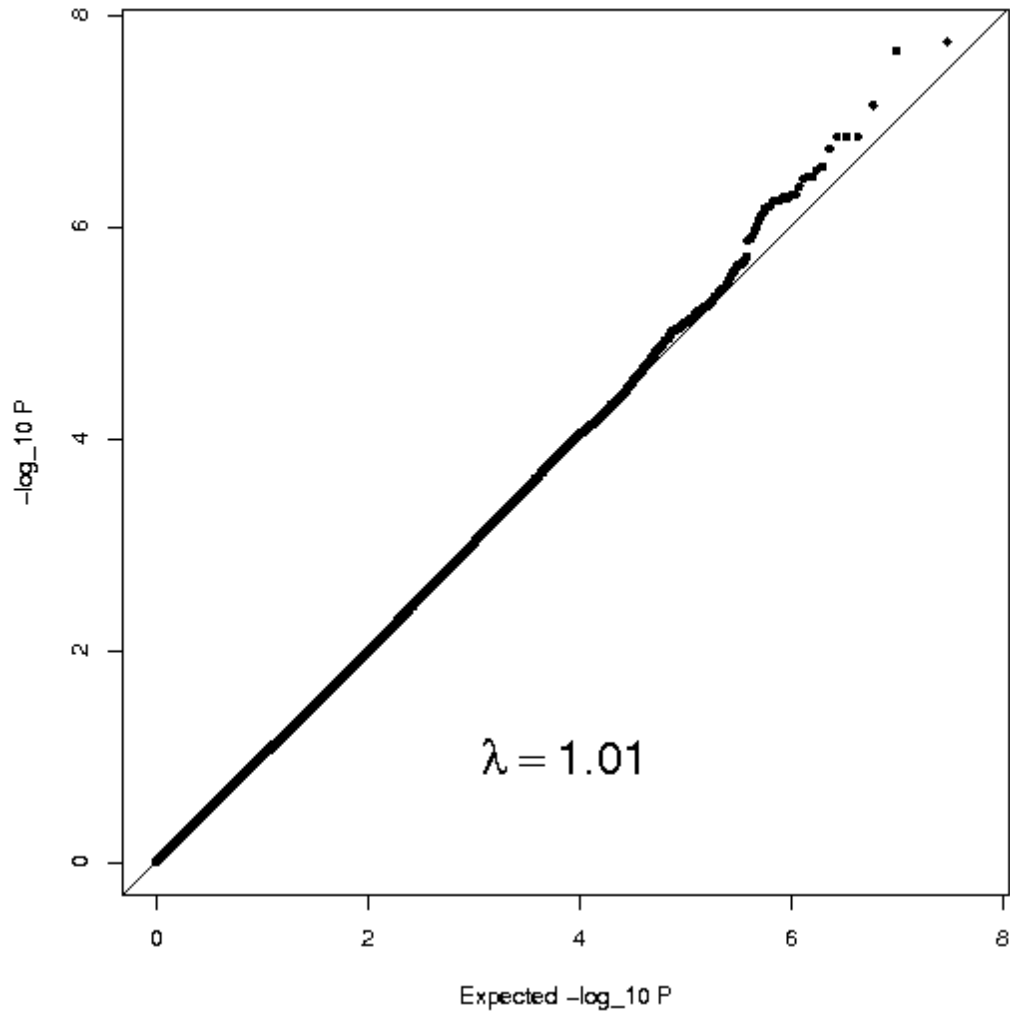

Figure S3. QQ plot from genome-wide association study (GWAS) in European Americans (EAs).

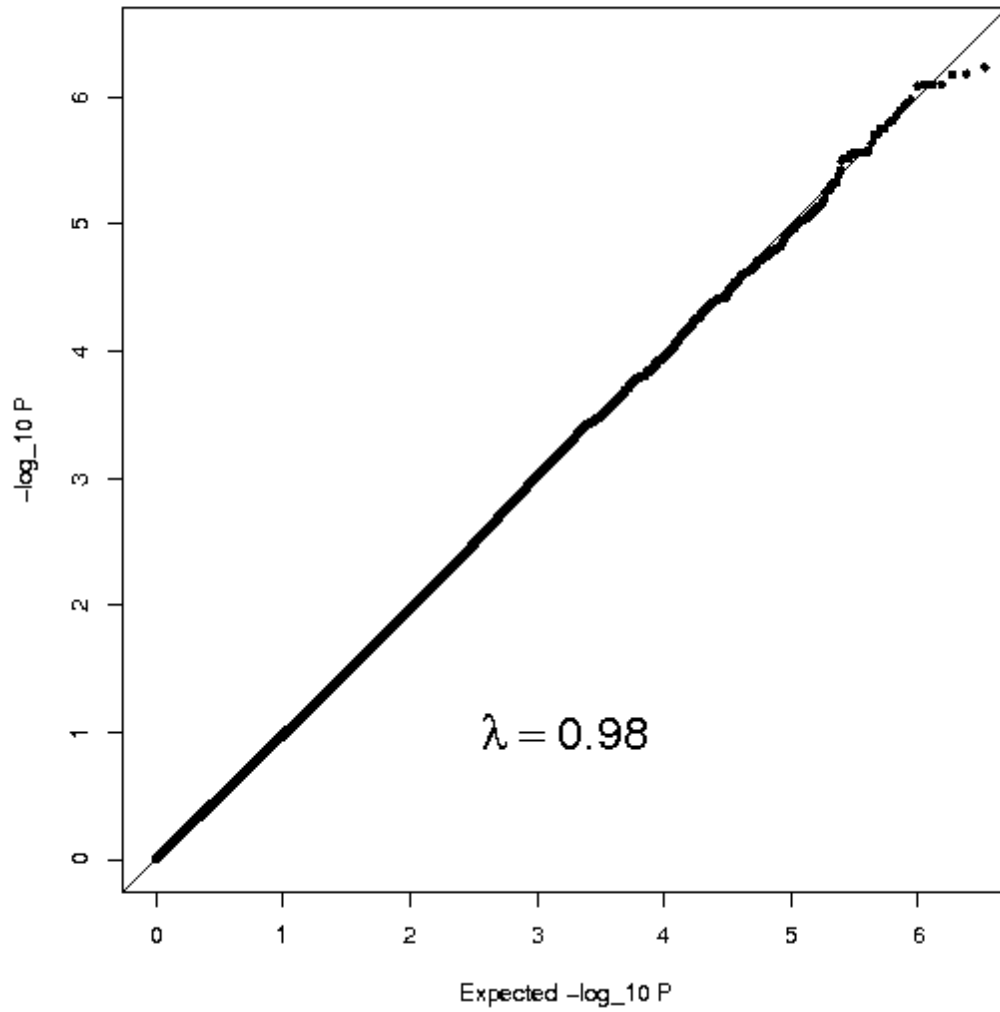

**Figure S4. Cannabis-related aggression (CRA) stratified by rs17440378 genotype in African Americans (left) and European Americans (right).**

Prevalence of CRA stratified by genotype for the GWS risk variants in African Americans (AAs) and European Americans (EAs). Cannabis-related aggression (CRA) is shown in percentage (%) stratified by genotype of the top SNP, rs17440378, in AAs and EAs.

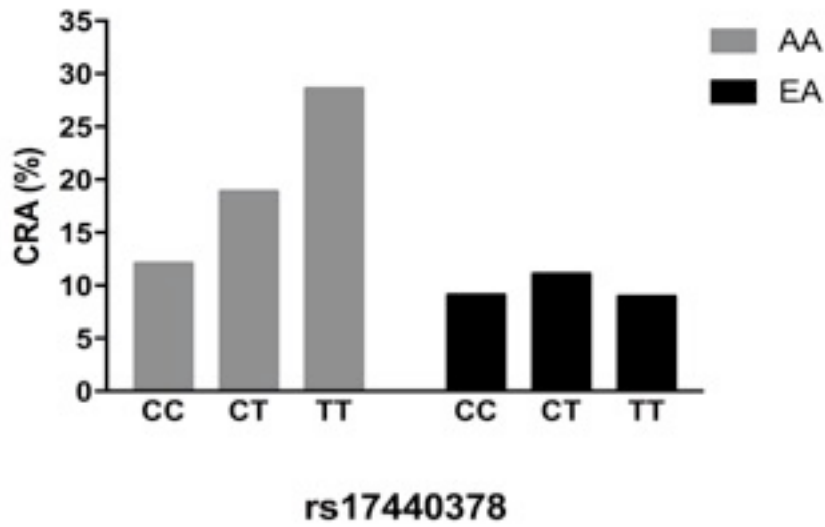

**Figure S5. Gene expression patterns of *HTR2B* in human brain samples stratified by rs17440378 genotype using Brainiac UK database.**

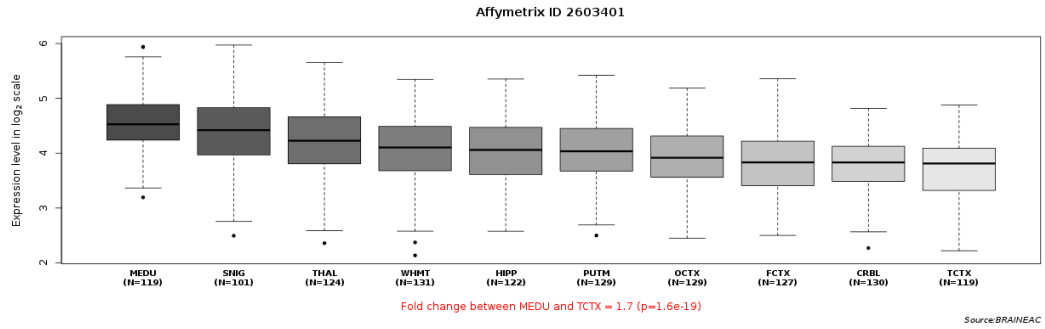

**Figure S6. Multi-tissue eQTL comparison between *C2orf72* and rs17440378 eQTL using GTEx database.**

**Multi-tissue eQTL Comparison**

ENSG00000204128.5 *C2orf72* and rs17440378 eQTL (Meta Analysis RE2 P-Value: 0)

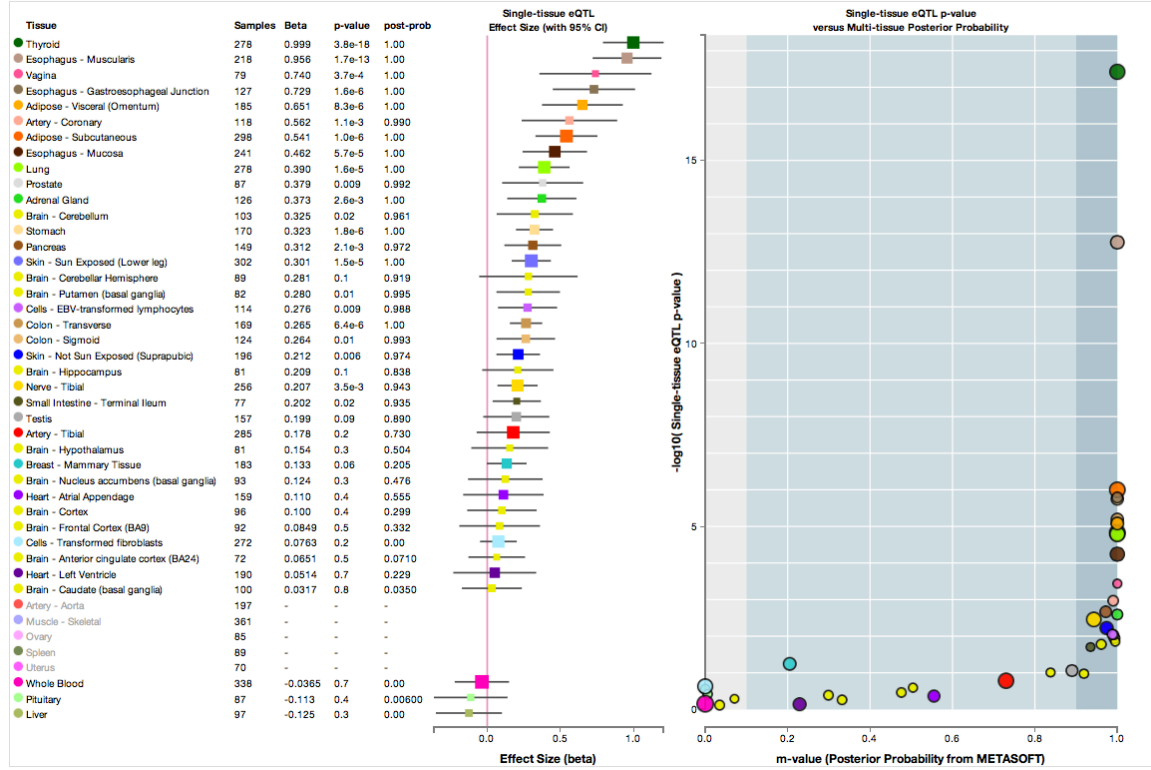

**Figure S7. Multi-tissue eQTL comparison between *HTR2B* and rs17440378 eQTL using GTEx database.**

**Multi-tissue eQTL Comparison**

ENSG00000135914.5 *HTR2B* and rs17440378 eQTL (Meta Analysis RE2 P-Value: 2.20617e-23)

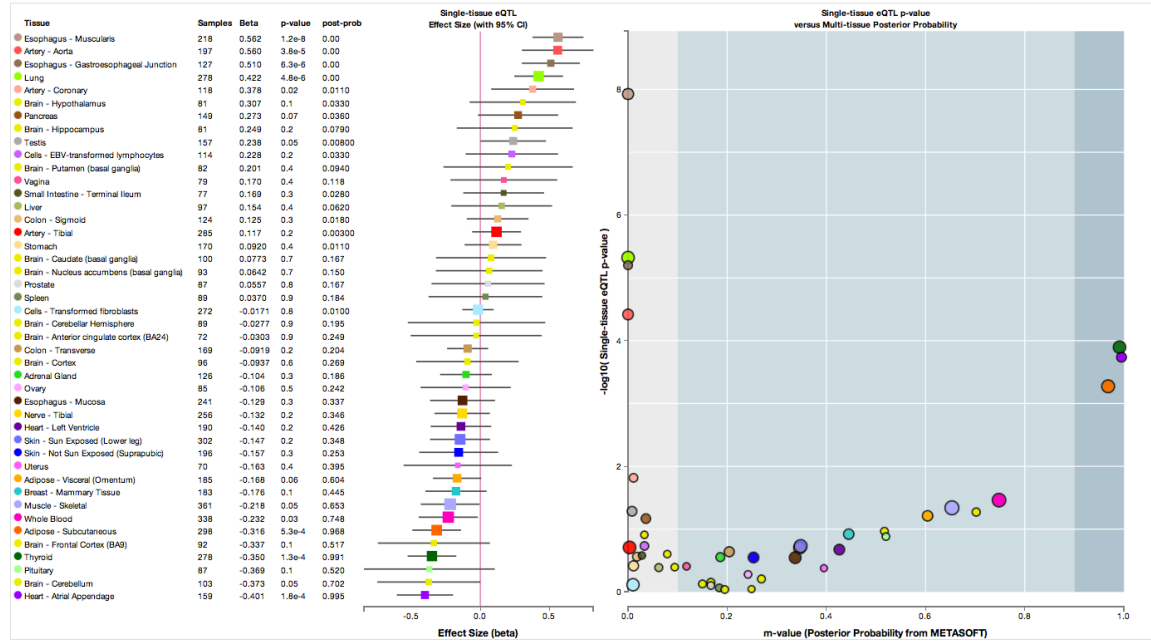



**Figure S8. Effects of THC (10 mg/kg) on locomotor activity in *Htr2b*<sup>-/-</sup> and WT mice.**

In agreement with our previous data, *Htr2b*<sup>-/-</sup> mice showed hyperactivity in basal condition (SAL group). THC (10 mg/kg, i.p.) treatment significantly decreased locomotion in both *Htr2b*<sup>-/-</sup> and WT (*Htr2b*<sup>+/+</sup>) mice. Genotype effect: \*\*\* =  $P < 0.001$ . Treatment effect: \*\*\* and \*\* =  $P < 0.001$  and 0.01, respectively.

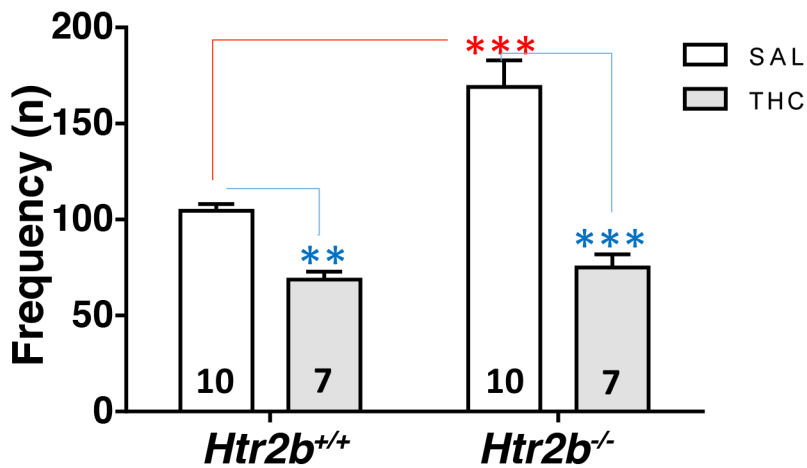

**Table S1. Top Findings in African-Americans ( $p < 5.0 \times 10^{-5}$ ).**

| Marker      | Chr | Pos (hg19) | Gene Name                   | Eff Allele | Alt Allele | Alle Freq YP1 | Beta YP1 | SE YP1 | P YP1    | Alle Freq YP2 | Beta YP2 | SE YP2 | P YP2    | Alle Freq Meta | Beta Meta | SE Meta | P Meta   | Direction |
|-------------|-----|------------|-----------------------------|------------|------------|---------------|----------|--------|----------|---------------|----------|--------|----------|----------------|-----------|---------|----------|-----------|
| rs35750632  | 2   | 232022300  | PSMD1<br>HTR2B/<br>PSMD1    | T          | TG         | 0.877         | -0.494   | 0.118  | 2.69E-05 | 0.869         | -0.634   | 0.166  | 1.35E-04 | 0.875          | -0.541    | 0.096   | 1.79E-08 | --        |
| rs17440378  | 2   | 231979355  |                             | T          | C          | 0.109         | 0.56     | 0.125  | 6.93E-06 | 0.115         | 0.599    | 0.179  | 8.36E-04 | 0.111          | 0.573     | 0.102   | 2.16E-08 | ++        |
| rs12468767  | 2   | 232036843  | PSMD1<br>TBC1D<br>10A       | T          | G          | 0.877         | -0.496   | 0.12   | 3.75E-05 | 0.867         | -0.6     | 0.171  | 4.55E-04 | 0.874          | -0.53     | 0.098   | 7.10E-08 | --        |
| rs4823088   | 22  | 30696099   |                             | T          | C          |               |          |        |          | 0.014         | 1.92     | 0.365  | 1.40E-07 | 0.014          | 1.92      | 0.365   | 1.40E-07 | ?+        |
| rs757867    | 22  | 30715202   | TBC1D<br>10A<br>CCDC1<br>57 | T          | C          |               |          |        |          | 0.986         | -1.92    | 0.365  | 1.40E-07 | 0.986          | -1.92     | 0.365   | 1.40E-07 | ?-        |
| rs2015035   | 22  | 30771554   |                             | T          | G          |               |          |        |          | 0.014         | 1.92     | 0.365  | 1.40E-07 | 0.014          | 1.92      | 0.365   | 1.40E-07 | ?+        |
| rs10057162  | 5   | 89525090   | PSMD1                       | T          | G          | 0.112         | 0.609    | 0.123  | 8.31E-07 | 0.11          | 0.378    | 0.19   | 4.63E-02 | 0.112          | 0.54      | 0.103   | 1.82E-07 | ++        |
| rs34540120  | 5   | 89523174   |                             | T          | TAC        | 0.887         | -0.596   | 0.123  | 1.38E-06 | 0.89          | -0.381   | 0.19   | 4.43E-02 | 0.888          | -0.532    | 0.103   | 2.70E-07 | --        |
| rs149740722 | 3   | 177317870  | GSG1L                       | C          | G          | 0.026         | 0.729    | 0.244  | 2.83E-03 | 0.035         | 1.169    | 0.269  | 1.40E-05 | 0.03           | 0.928     | 0.181   | 2.89E-07 | ++        |
| rs11949050  | 5   | 89523266   |                             | T          | G          | 0.114         | 0.593    | 0.123  | 1.57E-06 | 0.111         | 0.375    | 0.19   | 4.78E-02 | 0.113          | 0.528     | 0.103   | 3.32E-07 | ++        |
| rs16939648  | 16  | 27984243   | GSG1L<br>PSMD1              | A          | G          | 0.227         | 0.476    | 0.105  | 5.33E-06 | 0.228         | 0.339    | 0.139  | 1.49E-02 | 0.227          | 0.426     | 0.084   | 3.38E-07 | ++        |
| rs55637820  | 2   | 231935918  |                             | T          | C          | 0.107         | 0.548    | 0.126  | 1.46E-05 | 0.109         | 0.489    | 0.182  | 7.25E-03 | 0.108          | 0.529     | 0.104   | 3.53E-07 | ++        |
| rs34947651  | 16  | 27981236   | GSG1L<br>THSD7<br>B         | T          | C          | 0.229         | 0.471    | 0.104  | 5.76E-06 | 0.229         | 0.332    | 0.139  | 1.70E-02 | 0.229          | 0.421     | 0.083   | 4.13E-07 | ++        |
| rs149345708 | 2   | 138308058  |                             | A          | G          | 0.963         | -0.961   | 0.191  | 4.89E-07 |               |          |        |          | 0.963          | -0.961    | 0.191   | 4.89E-07 | -?        |
| rs4788020   | 16  | 27987389   | GSG1L                       | A          | C          | 0.236         | 0.469    | 0.104  | 6.18E-06 | 0.23          | 0.328    | 0.14   | 1.91E-02 | 0.234          | 0.419     | 0.083   | 4.97E-07 | ++        |
| rs72759756  | 9   | 121909049  |                             | A          | G          | 0.965         | -0.95    | 0.189  | 5.30E-07 |               |          |        |          | 0.965          | -0.95     | 0.19    | 5.30E-07 | -?        |
| rs17292799  | 9   | 121911162  | BRINP1                      | A          | G          | 0.965         | -0.95    | 0.189  | 5.30E-07 |               |          |        |          | 0.965          | -0.95     | 0.19    | 5.30E-07 | -?        |
| rs72759758  | 9   | 121911231  |                             | A          | T          | 0.965         | -0.95    | 0.189  | 5.30E-07 |               |          |        |          | 0.965          | -0.95     | 0.19    | 5.30E-07 | -?        |
| rs72759765  | 9   | 121926039  | GSG1L                       | A          | G          | 0.035         | 0.95     | 0.189  | 5.30E-07 |               |          |        |          | 0.035          | 0.95      | 0.19    | 5.30E-07 | +?        |
| rs114270663 | 3   | 177320605  |                             | A          | G          | 0.026         | 0.746    | 0.245  | 2.27E-03 | 0.034         | 1.114    | 0.272  | 4.28E-05 | 0.03           | 0.911     | 0.182   | 5.60E-07 | ++        |
| rs111834647 | 3   | 74330779   | CNTN3                       | A          | G          | 0.015         | 1.342    | 0.268  | 5.60E-07 |               |          |        |          | 0.015          | 1.342     | 0.268   | 5.60E-07 | +?        |
| rs74015182  | 16  | 27982326   |                             | A          | C          | 0.759         | -0.46    | 0.102  | 6.48E-06 | 0.766         | -0.32    | 0.138  | 2.08E-02 | 0.762          | -0.411    | 0.082   | 5.66E-07 | --        |
| rs12932580  | 16  | 27981544   | GSG1L<br>NSG2               | A          | G          | 0.24          | 0.457    | 0.102  | 7.08E-06 | 0.234         | 0.323    | 0.138  | 1.97E-02 | 0.238          | 0.41      | 0.082   | 5.73E-07 | ++        |
| rs73332709  | 5   | 173640890  |                             | A          | G          | 0.717         | -0.479   | 0.096  | 6.30E-07 |               |          |        |          | 0.717          | -0.479    | 0.096   | 6.30E-07 | -?        |

|             |    |           |        |    |      |       |        |       |          |       |        |       |          |       |        |       |          |    |
|-------------|----|-----------|--------|----|------|-------|--------|-------|----------|-------|--------|-------|----------|-------|--------|-------|----------|----|
| rs72764138  | 15 | 92856395  |        | T  | G    | 0.116 | 0.5    | 0.125 | 6.25E-05 | 0.111 | 0.522  | 0.176 | 3.06E-03 | 0.115 | 0.507  | 0.102 | 6.40E-07 | ++ |
| rs5997619   | 22 | 30752367  | SF3A1  | T  | C    |       |        |       |          | 0.014 | 1.855  | 0.373 | 6.52E-07 | 0.014 | 1.855  | 0.373 | 6.52E-07 | ?+ |
| rs112300838 | 6  | 9078153   |        | C  | G    | 0.959 | -0.946 | 0.19  | 6.72E-07 |       |        |       |          | 0.959 | -0.946 | 0.19  | 6.72E-07 | -? |
| rs17882740  | 4  | 24796771  | SOD3   | A  | G    | 0.011 | 1.516  | 0.306 | 7.47E-07 |       |        |       |          | 0.011 | 1.516  | 0.306 | 7.47E-07 | ++ |
| rs12927375  | 16 | 27987780  | GSG1L  | C  | G    | 0.764 | -0.469 | 0.104 | 6.18E-06 | 0.771 | -0.309 | 0.141 | 2.81E-02 | 0.766 | -0.413 | 0.084 | 7.72E-07 | -- |
| rs12444993  | 16 | 27980502  | GSG1L  | A  | C    | 0.24  | 0.442  | 0.102 | 1.34E-05 | 0.232 | 0.331  | 0.138 | 1.65E-02 | 0.237 | 0.403  | 0.082 | 8.27E-07 | ++ |
| rs12444955  | 16 | 27980343  | GSG1L  | T  | C    | 0.229 | 0.455  | 0.103 | 1.10E-05 | 0.229 | 0.324  | 0.139 | 1.97E-02 | 0.229 | 0.408  | 0.083 | 8.68E-07 | ++ |
| rs114717251 | 5  | 90216193  | GPR98  | T  | C    | 0.023 | 0.94   | 0.237 | 7.15E-05 | 0.029 | 0.962  | 0.336 | 4.20E-03 | 0.025 | 0.947  | 0.194 | 9.83E-07 | ++ |
| rs71535109  | 7  | 4436384   |        | CT | C    | 0.475 | -0.445 | 0.091 | 1.05E-06 |       |        |       |          | 0.475 | -0.445 | 0.091 | 1.05E-06 | -? |
| rs79001706  | 5  | 137050455 | KLHL3  | T  | C    | 0.029 | 0.83   | 0.203 | 4.44E-05 | 0.024 | 0.895  | 0.336 | 7.71E-03 | 0.028 | 0.848  | 0.174 | 1.10E-06 | ++ |
| rs384417    | 3  | 19871378  |        | C  | G    | 0.13  | 0.573  | 0.118 | 1.20E-06 |       |        |       |          | 0.13  | 0.573  | 0.118 | 1.20E-06 | ++ |
| rs187380    | 5  | 133411871 |        | T  | C    | 0.027 | 0.932  | 0.216 | 1.55E-05 | 0.033 | 0.68   | 0.294 | 2.08E-02 | 0.029 | 0.844  | 0.174 | 1.22E-06 | ++ |
| rs576244464 | 6  | 27120517  |        | A  | AAAC | 0.973 | -0.95  | 0.23  | 3.70E-05 | 0.97  | -0.774 | 0.301 | 1.01E-02 | 0.972 | -0.885 | 0.183 | 1.29E-06 | -- |
| rs7689521   | 4  | 24797398  | SOD3   | C  | G    | 0.989 | -1.475 | 0.305 | 1.32E-06 |       |        |       |          | 0.989 | -1.475 | 0.305 | 1.32E-06 | -? |
| rs3736461   | 10 | 5855403   | GD12   | C  | G    | 0.043 | 0.752  | 0.184 | 4.34E-05 | 0.049 | 0.679  | 0.263 | 9.72E-03 | 0.045 | 0.728  | 0.151 | 1.35E-06 | ++ |
| rs75339536  | 21 | 46011679  | TSPEAR | A  | G    | 0.102 | 0.617  | 0.13  | 1.91E-06 |       |        |       |          | 0.102 | 0.617  | 0.13  | 1.91E-06 | ++ |
| rs79041926  | 1  | 244316024 |        | A  | G    | 0.027 | 1.006  | 0.211 | 1.96E-06 |       |        |       |          | 0.026 | 1.006  | 0.211 | 1.96E-06 | ++ |
| rs9505639   | 6  | 9117717   |        | A  | G    | 0.029 | 1.013  | 0.213 | 2.07E-06 |       |        |       |          | 0.029 | 1.013  | 0.213 | 2.07E-06 | ++ |
| rs441117    | 3  | 19881723  |        | A  | G    | 0.13  | 0.576  | 0.118 | 1.16E-06 | 0.131 | 0.221  | 0.188 | 2.39E-01 | 0.131 | 0.475  | 0.1   | 2.14E-06 | ++ |
| rs143747975 | 4  | 83752984  | SEC31A | A  | G    | 0.957 | -0.822 | 0.174 | 2.22E-06 |       |        |       |          | 0.957 | -0.822 | 0.174 | 2.22E-06 | -? |
| rs570696747 | 1  | 175235513 |        | A  | C    | 0.011 | 1.456  | 0.308 | 2.26E-06 |       |        |       |          | 0.011 | 1.456  | 0.308 | 2.26E-06 | ++ |
| rs269377    | 3  | 19878733  |        | T  | C    | 0.132 | 0.56   | 0.118 | 2.27E-06 |       |        |       |          | 0.132 | 0.56   | 0.118 | 2.27E-06 | ++ |
| rs148697933 | 17 | 1027253   | ABR    | A  | G    | 0.033 | 0.952  | 0.201 | 2.27E-06 |       |        |       |          | 0.033 | 0.952  | 0.201 | 2.27E-06 | ++ |
| rs11825707  | 11 | 8310456   |        | T  | C    | 0.95  | -0.7   | 0.175 | 6.20E-05 | 0.94  | -0.617 | 0.244 | 1.15E-02 | 0.947 | -0.672 | 0.142 | 2.27E-06 | -- |
| rs77878914  | 21 | 46010039  | TSPEAR | C  | G    | 0.903 | -0.623 | 0.132 | 2.34E-06 |       |        |       |          | 0.903 | -0.623 | 0.132 | 2.34E-06 | -? |
| rs269373    | 3  | 19857703  |        | T  | C    | 0.134 | 0.552  | 0.117 | 2.41E-06 |       |        |       |          | 0.134 | 0.552  | 0.117 | 2.41E-06 | ++ |
| rs7577721   | 2  | 231899645 |        | T  | C    | 0.118 | 0.507  | 0.126 | 5.56E-05 | 0.113 | 0.458  | 0.188 | 1.48E-02 | 0.117 | 0.492  | 0.104 | 2.54E-06 | ++ |
| rs112431724 | 22 | 27971973  |        | T  | C    | 0.037 | 0.921  | 0.196 | 2.63E-06 |       |        |       |          | 0.037 | 0.921  | 0.196 | 2.63E-06 | ++ |

|             |    |           |         |   |      |       |        |       |          |       |        |       |          |       |        |       |          |    |
|-------------|----|-----------|---------|---|------|-------|--------|-------|----------|-------|--------|-------|----------|-------|--------|-------|----------|----|
| rs10042483  | 5  | 89524771  |         | A | G    | 0.907 | -0.542 | 0.135 | 5.87E-05 | 0.912 | -0.499 | 0.205 | 1.48E-02 | 0.908 | -0.529 | 0.113 | 2.66E-06 | -- |
| rs116418533 | 5  | 90177946  | GPR98   | T | C    | 0.032 | 0.866  | 0.209 | 3.52E-05 | 0.034 | 0.678  | 0.298 | 2.27E-02 | 0.033 | 0.804  | 0.171 | 2.66E-06 | ++ |
| rs7873111   | 9  | 99918645  |         | T | C    | 0.62  | -0.41  | 0.088 | 2.82E-06 |       |        |       |          | 0.62  | -0.41  | 0.088 | 2.82E-06 | -? |
| rs142759919 | 11 | 8322061   |         | G | GT   | 0.049 | 0.715  | 0.177 | 5.22E-05 | 0.059 | 0.597  | 0.252 | 1.78E-02 | 0.052 | 0.676  | 0.145 | 2.97E-06 | ++ |
| rs72882066  | 2  | 171027730 |         | A | C    | 0.03  | 0.849  | 0.212 | 6.15E-05 | 0.038 | 0.677  | 0.276 | 1.43E-02 | 0.033 | 0.785  | 0.168 | 3.00E-06 | ++ |
| rs76692579  | 5  | 90179044  | GPR98   | A | G    | 0.968 | -0.866 | 0.209 | 3.52E-05 | 0.965 | -0.66  | 0.297 | 2.64E-02 | 0.967 | -0.798 | 0.171 | 3.15E-06 | -- |
| rs114831425 | 12 | 67638803  |         | A | C    | 0.011 | 1.432  | 0.307 | 3.20E-06 |       |        |       |          | 0.011 | 1.432  | 0.307 | 3.20E-06 | +  |
| rs114428454 | 5  | 90054631  | GPR98   | A | C    | 0.969 | -0.799 | 0.213 | 1.74E-04 | 0.966 | -0.802 | 0.293 | 6.17E-03 | 0.968 | -0.8   | 0.172 | 3.36E-06 | -- |
| rs146987630 | 9  | 16120918  |         | T | C    | 0.012 | 1.274  | 0.274 | 3.44E-06 |       |        |       |          | 0.012 | 1.274  | 0.274 | 3.44E-06 | +  |
| rs13031656  | 2  | 181368613 |         | C | G    | 0.151 | 0.392  | 0.118 | 8.77E-04 | 0.149 | 0.559  | 0.168 | 8.63E-04 | 0.15  | 0.447  | 0.097 | 3.52E-06 | ++ |
| rs540376396 | 1  | 45138442  | TMEM53  | T | TAA  | 0.551 | 0.296  | 0.089 | 9.33E-04 | 0.542 | 0.438  | 0.13  | 7.69E-04 | 0.548 | 0.341  | 0.074 | 3.62E-06 | ++ |
| rs11676228  | 2  | 181355237 |         | A | T    | 0.148 | 0.391  | 0.118 | 9.67E-04 | 0.149 | 0.563  | 0.168 | 8.19E-04 | 0.148 | 0.448  | 0.097 | 3.75E-06 | ++ |
| rs7422521   | 2  | 171029252 |         | T | C    | 0.971 | -0.825 | 0.214 | 1.19E-04 | 0.963 | -0.714 | 0.277 | 1.00E-02 | 0.968 | -0.783 | 0.17  | 3.84E-06 | -- |
| rs7424191   | 2  | 171029253 |         | A | T    | 0.971 | -0.825 | 0.214 | 1.19E-04 | 0.963 | -0.714 | 0.277 | 1.00E-02 | 0.968 | -0.783 | 0.17  | 3.84E-06 | -- |
| rs72812371  | 16 | 87034453  |         | T | C    | 0.963 | -0.89  | 0.193 | 3.84E-06 |       |        |       |          | 0.963 | -0.89  | 0.193 | 3.84E-06 | -? |
| rs73198371  | 5  | 105914822 |         | T | G    | 0.041 | 0.83   | 0.18  | 3.88E-06 |       |        |       |          | 0.041 | 0.83   | 0.18  | 3.88E-06 | +  |
| rs147184218 | 2  | 179829275 | CCDC141 | G | GC   | 0.031 | 0.948  | 0.199 | 1.87E-06 | 0.028 | 0.328  | 0.369 | 3.74E-01 | 0.031 | 0.808  | 0.175 | 3.88E-06 | ++ |
| rs831430    | 12 | 104002077 | STAB2   | T | C    | 0.191 | 0.349  | 0.103 | 7.30E-04 | 0.165 | 0.536  | 0.163 | 1.01E-03 | 0.184 | 0.402  | 0.087 | 3.96E-06 | ++ |
| rs13010875  | 2  | 181365923 |         | A | G    | 0.852 | -0.39  | 0.118 | 1.01E-03 | 0.851 | -0.559 | 0.168 | 8.63E-04 | 0.852 | -0.446 | 0.097 | 4.06E-06 | -- |
| rs7561337   | 2  | 181352806 |         | T | G    | 0.849 | -0.397 | 0.118 | 7.53E-04 | 0.851 | -0.541 | 0.168 | 1.29E-03 | 0.85  | -0.444 | 0.097 | 4.11E-06 | -- |
| rs12891188  | 14 | 60168943  | RTN1    | T | C    | 0.113 | 0.493  | 0.128 | 1.24E-04 | 0.108 | 0.472  | 0.186 | 1.13E-02 | 0.112 | 0.486  | 0.106 | 4.26E-06 | ++ |
| rs79238552  | 17 | 17282172  |         | T | C    | 0.969 | -0.958 | 0.209 | 4.35E-06 |       |        |       |          | 0.969 | -0.959 | 0.209 | 4.35E-06 | -? |
| rs867437025 | 17 | 17282246  |         | G | GTCA | 0.032 | 0.921  | 0.2   | 4.38E-06 |       |        |       |          | 0.032 | 0.921  | 0.201 | 4.38E-06 | +  |
| rs1424654   | 2  | 171029437 |         | A | T    | 0.029 | 0.825  | 0.214 | 1.19E-04 | 0.038 | 0.698  | 0.276 | 1.15E-02 | 0.033 | 0.777  | 0.169 | 4.44E-06 | ++ |
| rs1424652   | 2  | 171029691 |         | T | C    | 0.029 | 0.825  | 0.214 | 1.19E-04 | 0.038 | 0.698  | 0.276 | 1.15E-02 | 0.033 | 0.777  | 0.169 | 4.44E-06 | ++ |
| rs371934588 | 21 | 46010210  | TSPEAR  | A | G    | 0.099 | 0.602  | 0.131 | 4.48E-06 |       |        |       |          | 0.099 | 0.602  | 0.131 | 4.48E-06 | +  |
| rs56011924  | 19 | 40923776  |         | T | C    | 0.059 | 0.553  | 0.163 | 6.77E-04 | 0.06  | 0.709  | 0.226 | 1.74E-03 | 0.059 | 0.606  | 0.132 | 4.49E-06 | ++ |
| rs17138931  | 6  | 4894001   | CDYL    | T | C    | 0.968 | -0.951 | 0.207 | 4.53E-06 |       |        |       |          | 0.968 | -0.951 | 0.207 | 4.53E-06 | -? |

|             |    |           |                       |     |   |       |        |       |          |       |        |       |          |       |        |       |          |    |
|-------------|----|-----------|-----------------------|-----|---|-------|--------|-------|----------|-------|--------|-------|----------|-------|--------|-------|----------|----|
| rs369235400 | 7  | 129508264 | UBE2H                 | CA  | C | 0.291 | -0.448 | 0.108 | 3.22E-05 | 0.287 | -0.322 | 0.159 | 4.29E-02 | 0.29  | -0.408 | 0.089 | 4.70E-06 | -- |
| rs2019924   | 10 | 59771907  |                       | T   | C | 0.603 | 0.346  | 0.101 | 6.15E-04 | 0.598 | 0.431  | 0.141 | 2.21E-03 | 0.601 | 0.375  | 0.082 | 4.94E-06 | ++ |
| rs34165368  | 9  | 97439214  |                       | A   | G | 0.028 | 0.698  | 0.228 | 2.17E-03 | 0.037 | 0.929  | 0.269 | 5.64E-04 | 0.032 | 0.794  | 0.174 | 4.94E-06 | ++ |
| rs145862183 | 5  | 90013848  |                       | A   | G | 0.016 | 0.863  | 0.279 | 1.97E-03 | 0.022 | 1.23   | 0.356 | 5.55E-04 | 0.018 | 1.002  | 0.22  | 4.99E-06 | ++ |
| rs141163966 | 10 | 78075387  | GPR98<br>C10orf1<br>1 | CT  | C | 0.065 | 0.683  | 0.157 | 1.41E-05 | 0.057 | 0.424  | 0.26  | 1.02E-01 | 0.063 | 0.613  | 0.135 | 5.09E-06 | ++ |
| rs831683    | 12 | 103999401 | STAB2                 | T   | C | 0.808 | -0.347 | 0.103 | 7.76E-04 | 0.833 | -0.525 | 0.163 | 1.29E-03 | 0.816 | -0.398 | 0.087 | 5.10E-06 | -- |
| rs114648534 | 4  | 83745868  | SEC31A                | A   | G | 0.957 | -0.797 | 0.175 | 5.11E-06 |       |        |       |          | 0.957 | -0.797 | 0.175 | 5.11E-06 | -? |
| rs186689544 | 7  | 13746927  |                       | T   | C | 0.985 | -1.218 | 0.268 | 5.39E-06 |       |        |       |          | 0.985 | -1.218 | 0.268 | 5.39E-06 | -? |
| rs6084337   | 20 | 384898    |                       | A   | G | 0.711 | 0.473  | 0.104 | 5.41E-06 |       |        |       |          | 0.711 | 0.473  | 0.104 | 5.41E-06 | +? |
| rs116776594 | 21 | 46010392  | TSPEAR                | C   | G | 0.9   | -0.597 | 0.131 | 5.44E-06 |       |        |       |          | 0.9   | -0.597 | 0.131 | 5.44E-06 | -? |
| rs41281164  | 9  | 97419334  |                       | T   | C | 0.97  | -0.498 | 0.225 | 2.67E-02 | 0.958 | -1.089 | 0.251 | 1.43E-05 | 0.965 | -0.761 | 0.167 | 5.51E-06 | -- |
| rs10261367  | 7  | 129509742 | UBE2H                 | C   | G | 0.729 | 0.437  | 0.109 | 5.78E-05 | 0.731 | 0.353  | 0.164 | 3.09E-02 | 0.73  | 0.411  | 0.09  | 5.52E-06 | ++ |
| rs199831803 | 7  | 129532098 |                       | CT  | C | 0.708 | 0.435  | 0.107 | 4.95E-05 | 0.714 | 0.337  | 0.16  | 3.53E-02 | 0.71  | 0.405  | 0.089 | 5.54E-06 | ++ |
| rs374116165 | 21 | 46011406  | UBE2H<br>TSPEAR       | T   | G | 0.097 | 0.608  | 0.134 | 5.60E-06 |       |        |       |          | 0.097 | 0.608  | 0.134 | 5.60E-06 | +? |
| rs144363824 | 21 | 46011409  | TSPEAR                | A   | G | 0.097 | 0.608  | 0.134 | 5.60E-06 |       |        |       |          | 0.097 | 0.608  | 0.134 | 5.60E-06 | +? |
| rs1486831   | 7  | 129512093 | UBE2H                 | C   | G | 0.293 | -0.446 | 0.108 | 3.66E-05 | 0.287 | -0.319 | 0.159 | 4.50E-02 | 0.291 | -0.406 | 0.089 | 5.61E-06 | -- |
| rs79157838  | 7  | 10182601  |                       | T   | C | 0.987 | -1.292 | 0.285 | 5.66E-06 |       |        |       |          | 0.987 | -1.292 | 0.285 | 5.66E-06 | -? |
| rs139899589 | 7  | 10183196  |                       | T   | G | 0.987 | -1.292 | 0.285 | 5.66E-06 |       |        |       |          | 0.987 | -1.292 | 0.285 | 5.66E-06 | -? |
| rs525252    | 6  | 125429351 |                       | A   | G | 0.351 | 0.352  | 0.092 | 1.34E-04 | 0.357 | 0.325  | 0.132 | 1.40E-02 | 0.353 | 0.343  | 0.076 | 5.67E-06 | ++ |
| rs4480118   | 8  | 61879363  |                       | A   | C | 0.627 | 0.354  | 0.091 | 1.03E-04 | 0.565 | 0.302  | 0.127 | 1.77E-02 | 0.606 | 0.336  | 0.074 | 5.70E-06 | ++ |
| rs34487135  | 11 | 8325316   |                       | CAG | C | 0.93  | -0.614 | 0.151 | 5.07E-05 | 0.932 | -0.495 | 0.238 | 3.76E-02 | 0.931 | -0.58  | 0.128 | 5.76E-06 | -- |
| rs181998721 | 21 | 46010712  | TSPEAR                | T   | C | 0.9   | -0.595 | 0.131 | 5.79E-06 |       |        |       |          | 0.9   | -0.595 | 0.131 | 5.79E-06 | -? |
| rs192724113 | 4  | 107447441 |                       | A   | G | 0.029 | 0.943  | 0.208 | 5.86E-06 |       |        |       |          | 0.029 | 0.943  | 0.208 | 5.86E-06 | +? |
| rs79708490  | 12 | 101379068 | ANO4                  | T   | C | 0.037 | 0.626  | 0.192 | 1.14E-03 | 0.04  | 0.914  | 0.28  | 1.10E-03 | 0.038 | 0.718  | 0.159 | 5.92E-06 | ++ |
| rs148799648 | 15 | 43923717  | STRC                  | A   | G | 0.056 | 0.751  | 0.159 | 2.35E-06 | 0.048 | 0.237  | 0.285 | 4.05E-01 | 0.054 | 0.629  | 0.139 | 5.97E-06 | ++ |
| rs75209008  | 21 | 46009463  | TSPEAR                | A   | G | 0.902 | -0.593 | 0.131 | 6.05E-06 |       |        |       |          | 0.902 | -0.593 | 0.131 | 6.05E-06 | -? |
| rs55682483  | 7  | 129508489 | UBE2H                 | T   | C | 0.707 | 0.444  | 0.107 | 3.35E-05 | 0.711 | 0.305  | 0.157 | 5.14E-02 | 0.709 | 0.4    | 0.088 | 6.08E-06 | ++ |
| rs6467267   | 7  | 129511036 | UBE2H                 | T   | C | 0.271 | -0.434 | 0.109 | 6.49E-05 | 0.269 | -0.353 | 0.164 | 3.09E-02 | 0.27  | -0.409 | 0.09  | 6.15E-06 | -- |

|             |    |           |          |   |       |       |        |       |          |       |        |       |          |       |        |       |          |    |
|-------------|----|-----------|----------|---|-------|-------|--------|-------|----------|-------|--------|-------|----------|-------|--------|-------|----------|----|
| rs6731739   | 2  | 235413286 |          | A | G     | 0.278 | 0.412  | 0.093 | 9.31E-06 | 0.287 | 0.211  | 0.143 | 1.41E-01 | 0.281 | 0.352  | 0.078 | 6.17E-06 | ++ |
| rs148402127 | 10 | 78120967  | C10orf11 | T | C     | 0.067 | 0.71   | 0.156 | 5.16E-06 | 0.059 | 0.309  | 0.265 | 2.45E-01 | 0.065 | 0.607  | 0.134 | 6.19E-06 | ++ |
| rs112561380 | 7  | 129520535 | UBE2H    | T | TG    | 0.729 | 0.426  | 0.109 | 8.57E-05 | 0.732 | 0.372  | 0.165 | 2.44E-02 | 0.73  | 0.41   | 0.091 | 6.22E-06 | ++ |
| rs10500121  | 7  | 129520583 | UBE2H    | T | C     | 0.729 | 0.426  | 0.109 | 8.57E-05 | 0.732 | 0.372  | 0.165 | 2.44E-02 | 0.73  | 0.41   | 0.091 | 6.22E-06 | ++ |
| rs139636006 | 7  | 129572652 | UBE2H    | G | GTCTA | 0.291 | -0.438 | 0.108 | 4.85E-05 | 0.285 | -0.33  | 0.16  | 3.99E-02 | 0.289 | -0.404 | 0.089 | 6.24E-06 | -- |
| rs2275774   | 10 | 5799613   | FAM208B  | A | G     | 0.962 | -0.765 | 0.191 | 6.13E-05 | 0.958 | -0.605 | 0.283 | 3.27E-02 | 0.961 | -0.715 | 0.158 | 6.27E-06 | -- |
| rs113913410 | 14 | 25909855  |          | A | C     | 0.023 | 0.889  | 0.242 | 2.36E-04 | 0.017 | 1.025  | 0.388 | 8.35E-03 | 0.021 | 0.926  | 0.205 | 6.32E-06 | ++ |
| rs74524297  | 21 | 46010025  | TSPEAR   | C | G     | 0.909 | -0.61  | 0.135 | 6.33E-06 |       |        |       |          | 0.909 | -0.61  | 0.135 | 6.33E-06 | -? |
| rs114480957 | 21 | 46010464  | TSPEAR   | C | G     | 0.112 | 0.562  | 0.125 | 6.38E-06 |       |        |       |          | 0.112 | 0.562  | 0.125 | 6.38E-06 | +? |
| rs35392308  | 7  | 149008043 |          | A | G     | 0.936 | -0.625 | 0.156 | 6.32E-05 | 0.95  | -0.541 | 0.257 | 3.55E-02 | 0.94  | -0.602 | 0.134 | 6.46E-06 | -- |
| rs12685159  | 9  | 97419146  |          | A | C     | 0.031 | 0.485  | 0.224 | 3.05E-02 | 0.042 | 1.089  | 0.251 | 1.43E-05 | 0.035 | 0.753  | 0.167 | 6.65E-06 | ++ |
| rs3807121   | 7  | 129505832 | UBE2H    | A | G     | 0.668 | 0.39   | 0.1   | 8.89E-05 | 0.674 | 0.336  | 0.15  | 2.52E-02 | 0.67  | 0.374  | 0.083 | 6.69E-06 | ++ |
| rs4150990   | 19 | 40930577  | SERTA1   | T | C     | 0.941 | -0.531 | 0.161 | 9.76E-04 | 0.94  | -0.709 | 0.226 | 1.74E-03 | 0.941 | -0.591 | 0.131 | 6.72E-06 | -- |
| rs188073085 | 1  | 175225803 |          | A | T     | 0.011 | 1.406  | 0.313 | 6.82E-06 |       |        |       |          | 0.011 | 1.406  | 0.312 | 6.82E-06 | +? |
| rs76089179  | 18 | 7372568   |          | T | C     | 0.021 | 1.097  | 0.244 | 6.95E-06 |       |        |       |          | 0.021 | 1.097  | 0.244 | 6.95E-06 | +? |
| rs75823176  | 18 | 7372714   |          | T | G     | 0.979 | -1.097 | 0.244 | 6.95E-06 |       |        |       |          | 0.979 | -1.097 | 0.244 | 6.95E-06 | -? |
| rs116323131 | 18 | 7372732   |          | A | G     | 0.979 | -1.097 | 0.244 | 6.95E-06 |       |        |       |          | 0.979 | -1.097 | 0.244 | 6.95E-06 | -? |
| rs10817938  | 9  | 100462409 |          | T | C     | 0.988 | -1.248 | 0.278 | 6.98E-06 |       |        |       |          | 0.988 | -1.248 | 0.278 | 6.98E-06 | -? |
| rs1526323   | 7  | 129510308 | UBE2H    | A | T     | 0.273 | -0.433 | 0.108 | 6.06E-05 | 0.27  | -0.335 | 0.161 | 3.73E-02 | 0.272 | -0.402 | 0.09  | 7.12E-06 | -- |
| rs587693578 | 21 | 46011718  | TSPEAR   | T | C     | 0.895 | -0.578 | 0.129 | 7.15E-06 |       |        |       |          | 0.895 | -0.578 | 0.129 | 7.15E-06 | -? |
| rs7911724   | 10 | 59768336  |          | T | G     | 0.6   | 0.347  | 0.101 | 6.12E-04 | 0.598 | 0.413  | 0.141 | 3.46E-03 | 0.599 | 0.37   | 0.082 | 7.19E-06 | ++ |
| rs1930476   | 10 | 59768994  |          | T | C     | 0.4   | -0.347 | 0.101 | 6.12E-04 | 0.402 | -0.413 | 0.141 | 3.46E-03 | 0.401 | -0.37  | 0.082 | 7.19E-06 | -- |
| rs4405262   | 10 | 59769179  |          | T | C     | 0.6   | 0.347  | 0.101 | 6.12E-04 | 0.598 | 0.413  | 0.141 | 3.46E-03 | 0.599 | 0.37   | 0.082 | 7.19E-06 | ++ |
| rs142536865 | 10 | 59769818  |          | A | AAAG  | 0.6   | 0.347  | 0.101 | 6.12E-04 | 0.598 | 0.413  | 0.141 | 3.46E-03 | 0.599 | 0.37   | 0.082 | 7.19E-06 | ++ |
| rs145381340 | 1  | 175243401 |          | A | G     | 0.988 | -1.354 | 0.302 | 7.44E-06 |       |        |       |          | 0.988 | -1.354 | 0.302 | 7.44E-06 | -? |
| rs146159724 | 1  | 175248857 |          | T | G     | 0.012 | 1.354  | 0.302 | 7.44E-06 |       |        |       |          | 0.012 | 1.354  | 0.302 | 7.44E-06 | +? |
| rs147003316 | 1  | 175250175 |          | A | G     | 0.988 | -1.354 | 0.302 | 7.44E-06 |       |        |       |          | 0.988 | -1.354 | 0.302 | 7.44E-06 | -? |
| rs73046390  | 19 | 40933942  |          | A | G     | 0.941 | -0.538 | 0.161 | 8.42E-04 | 0.94  | -0.687 | 0.226 | 2.42E-03 | 0.94  | -0.588 | 0.131 | 7.49E-06 | -- |

|             |    |           |                 |    |      |       |        |       |          |       |        |       |          |       |        |       |          |    |
|-------------|----|-----------|-----------------|----|------|-------|--------|-------|----------|-------|--------|-------|----------|-------|--------|-------|----------|----|
| rs11570907  | 12 | 68623905  |                 | T  | TG   | 0.948 | -0.719 | 0.161 | 7.52E-06 |       |        |       |          | 0.948 | -0.719 | 0.161 | 7.52E-06 | -? |
| rs6668870   | 1  | 45141645  | C1orf228        | C  | G    | 0.433 | 0.302  | 0.09  | 7.78E-04 | 0.446 | 0.378  | 0.126 | 2.70E-03 | 0.437 | 0.328  | 0.073 | 7.53E-06 | ++ |
| rs11582807  | 1  | 45142157  | C1orf228        | A  | G    | 0.567 | -0.302 | 0.09  | 7.78E-04 | 0.554 | -0.378 | 0.126 | 2.70E-03 | 0.563 | -0.328 | 0.073 | 7.53E-06 | -- |
| rs11581074  | 1  | 45142209  | C1orf228        | A  | G    | 0.433 | 0.302  | 0.09  | 7.78E-04 | 0.446 | 0.378  | 0.126 | 2.70E-03 | 0.437 | 0.328  | 0.073 | 7.53E-06 | ++ |
| rs1344367   | 5  | 67845698  |                 | A  | C    | 0.387 | 0.399  | 0.089 | 7.62E-06 |       |        |       |          | 0.387 | 0.399  | 0.089 | 7.62E-06 | +? |
| rs28604351  | 7  | 129526340 | UBE2H           | T  | G    | 0.746 | 0.444  | 0.109 | 4.86E-05 | 0.741 | 0.321  | 0.162 | 4.80E-02 | 0.744 | 0.406  | 0.091 | 7.68E-06 | ++ |
| rs144609516 | 18 | 27668193  | UBE2H           | A  | G    | 0.987 | -1.226 | 0.289 | 2.26E-05 | 0.986 | -0.758 | 0.453 | 9.46E-02 | 0.986 | -1.091 | 0.244 | 7.77E-06 | -- |
| rs559573174 | 4  | 83757347  |                 | A  | G    | 0.022 | 1.006  | 0.225 | 7.85E-06 |       |        |       |          | 0.022 | 1.006  | 0.225 | 7.85E-06 | +? |
| rs77322363  | 5  | 90018628  | SEC31A          | A  | C    | 0.967 | -0.74  | 0.207 | 3.39E-04 | 0.96  | -0.762 | 0.285 | 7.57E-03 | 0.964 | -0.748 | 0.167 | 7.86E-06 | -- |
| rs11448310  | 7  | 129521461 | GPR98           | CT | C    | 0.273 | -0.422 | 0.108 | 8.99E-05 | 0.269 | -0.353 | 0.162 | 2.95E-02 | 0.272 | -0.401 | 0.09  | 7.93E-06 | -- |
| rs62491499  | 7  | 129508277 | UBE2H           | A  | G    | 0.724 | 0.419  | 0.107 | 9.71E-05 | 0.73  | 0.36   | 0.163 | 2.77E-02 | 0.726 | 0.401  | 0.09  | 7.95E-06 | ++ |
| rs142223349 | 6  | 15920153  | UBE2H           | T  | TG   | 0.02  | 1.101  | 0.256 | 1.68E-05 | 0.021 | 0.611  | 0.382 | 1.10E-01 | 0.02  | 0.95   | 0.213 | 7.96E-06 | ++ |
| rs74317380  | 11 | 101841571 | KIAA1377        | T  | C    | 0.017 | 1.164  | 0.261 | 7.99E-06 |       |        |       |          | 0.017 | 1.164  | 0.261 | 7.99E-06 | +? |
| rs182008011 | 11 | 101793916 | KIAA1377        | T  | C    | 0.017 | 1.161  | 0.26  | 8.09E-06 |       |        |       |          | 0.017 | 1.161  | 0.26  | 8.09E-06 | +? |
| rs201360771 | 11 | 101793918 | KIAA1377        | A  | AG   | 0.983 | -1.161 | 0.26  | 8.09E-06 |       |        |       |          | 0.983 | -1.161 | 0.26  | 8.09E-06 | -? |
| rs146312926 | 21 | 46009947  | TSPEAR          | G  | GTGA | 0.903 | -0.592 | 0.133 | 8.19E-06 |       |        |       |          | 0.903 | -0.592 | 0.133 | 8.19E-06 | -? |
| rs2037720   | 7  | 129506548 | UBE2H           | T  | C    | 0.274 | -0.42  | 0.108 | 9.60E-05 | 0.27  | -0.357 | 0.163 | 2.89E-02 | 0.273 | -0.401 | 0.09  | 8.22E-06 | -- |
| rs11334941  | 7  | 129510562 | UBE2H           | T  | TA   | 0.289 | -0.436 | 0.108 | 4.99E-05 | 0.285 | -0.312 | 0.159 | 4.98E-02 | 0.288 | -0.397 | 0.089 | 8.23E-06 | -- |
| rs34598210  | 7  | 48646412  | UBE2H<br>ABCA13 | T  | C    | 0.011 | 1.225  | 0.309 | 7.50E-05 | 0.016 | 0.927  | 0.437 | 3.37E-02 | 0.013 | 1.126  | 0.253 | 8.26E-06 | ++ |
| rs115276657 | 17 | 1025166   | ABR             | T  | C    | 0.035 | 0.882  | 0.198 | 8.37E-06 |       |        |       |          | 0.035 | 0.882  | 0.198 | 8.37E-06 | +? |
| rs146658424 | 11 | 22391195  | SLC17A6         | A  | G    | 0.019 | 1.121  | 0.252 | 8.44E-06 |       |        |       |          | 0.019 | 1.121  | 0.252 | 8.44E-06 | +? |
| rs184447374 | 14 | 44533372  |                 | T  | C    | 0.021 | 1.06   | 0.238 | 8.45E-06 |       |        |       |          | 0.021 | 1.06   | 0.238 | 8.45E-06 | +? |
| rs7789191   | 7  | 129583060 | UBE2H           | C  | G    | 0.708 | 0.442  | 0.107 | 3.81E-05 | 0.714 | 0.292  | 0.156 | 6.17E-02 | 0.71  | 0.394  | 0.088 | 8.48E-06 | ++ |
| rs57314877  | 7  | 129553263 | UBE2H           | T  | C    | 0.708 | 0.431  | 0.107 | 5.78E-05 | 0.714 | 0.316  | 0.158 | 4.56E-02 | 0.71  | 0.395  | 0.089 | 8.58E-06 | ++ |
| rs28473687  | 7  | 129555368 | UBE2H           | T  | C    | 0.708 | 0.431  | 0.107 | 5.78E-05 | 0.714 | 0.316  | 0.158 | 4.56E-02 | 0.71  | 0.395  | 0.089 | 8.58E-06 | ++ |
| rs7783328   | 7  | 129564637 | UBE2H           | C  | G    | 0.707 | 0.427  | 0.107 | 6.25E-05 | 0.713 | 0.32   | 0.158 | 4.31E-02 | 0.709 | 0.394  | 0.088 | 8.59E-06 | ++ |
| rs148426090 | 21 | 46009955  | UBE2H<br>TSPEAR | C  | G    | 0.097 | 0.59   | 0.133 | 8.59E-06 |       |        |       |          | 0.097 | 0.591  | 0.133 | 8.59E-06 | +? |
| rs703607    | 12 | 104007349 | STAB2           | A  | C    | 0.188 | 0.329  | 0.104 | 1.50E-03 | 0.161 | 0.552  | 0.167 | 9.30E-04 | 0.181 | 0.391  | 0.088 | 8.77E-06 | ++ |

|             |    |           |         |   |    |       |        |       |          |       |        |       |          |       |        |       |          |    |
|-------------|----|-----------|---------|---|----|-------|--------|-------|----------|-------|--------|-------|----------|-------|--------|-------|----------|----|
| rs62491518  | 7  | 129527572 | UBE2H   | T | C  | 0.292 | -0.431 | 0.107 | 5.78E-05 | 0.286 | -0.314 | 0.158 | 4.65E-02 | 0.29  | -0.394 | 0.089 | 8.78E-06 | -- |
| rs10216153  | 7  | 129528249 | UBE2H   | T | C  | 0.292 | -0.431 | 0.107 | 5.78E-05 | 0.286 | -0.314 | 0.158 | 4.65E-02 | 0.29  | -0.394 | 0.089 | 8.78E-06 | -- |
| rs146481131 | 7  | 129539083 | UBE2H   | T | TG | 0.273 | -0.415 | 0.108 | 1.26E-04 | 0.268 | -0.373 | 0.165 | 2.39E-02 | 0.272 | -0.402 | 0.09  | 8.78E-06 | -- |
| rs587610033 | 21 | 46010648  | TSPEAR  | A | G  | 0.099 | 0.587  | 0.132 | 8.98E-06 |       |        |       |          | 0.099 | 0.587  | 0.132 | 8.98E-06 | +? |
| rs16933397  | 10 | 78106137  | C10orf1 | T | C  | 0.07  | 0.664  | 0.152 | 1.30E-05 | 0.06  | 0.348  | 0.26  | 1.80E-01 | 0.067 | 0.583  | 0.131 | 9.03E-06 | ++ |
| rs12463656  | 2  | 232036396 | PSMD1   | A | G  | 0.157 | 0.383  | 0.11  | 5.05E-04 | 0.158 | 0.459  | 0.165 | 5.40E-03 | 0.157 | 0.407  | 0.092 | 9.10E-06 | ++ |
| rs7566683   | 2  | 181349217 | PSMD1   | T | G  | 0.841 | -0.344 | 0.116 | 3.01E-03 | 0.842 | -0.584 | 0.167 | 4.58E-04 | 0.841 | -0.422 | 0.095 | 9.11E-06 | -- |
| rs139921370 | 12 | 72402228  | TPH2    | T | G  | 0.013 | 1.108  | 0.314 | 4.15E-04 | 0.018 | 1.036  | 0.385 | 7.15E-03 | 0.015 | 1.079  | 0.243 | 9.17E-06 | ++ |
| rs7803795   | 7  | 129561516 | UBE2H   | T | C  | 0.272 | -0.421 | 0.108 | 9.90E-05 | 0.268 | -0.351 | 0.163 | 3.11E-02 | 0.271 | -0.4   | 0.09  | 9.17E-06 | -- |
| rs73161641  | 7  | 129530503 | UBE2H   | T | C  | 0.272 | -0.419 | 0.108 | 1.05E-04 | 0.269 | -0.353 | 0.162 | 2.95E-02 | 0.271 | -0.399 | 0.09  | 9.23E-06 | -- |
| rs12993861  | 2  | 181375740 | UBE2H   | C | G  | 0.811 | -0.332 | 0.11  | 2.47E-03 | 0.814 | -0.533 | 0.156 | 6.55E-04 | 0.812 | -0.398 | 0.09  | 9.25E-06 | -- |
| rs11570908  | 12 | 68623721  |         | T | G  | 0.053 | 0.704  | 0.159 | 9.27E-06 |       |        |       |          | 0.053 | 0.704  | 0.159 | 9.27E-06 | +? |
| rs17162295  | 7  | 129516157 | UBE2H   | A | C  | 0.271 | -0.421 | 0.108 | 1.01E-04 | 0.269 | -0.353 | 0.164 | 3.09E-02 | 0.27  | -0.4   | 0.09  | 9.27E-06 | -- |
| rs10837583  | 11 | 41164213  | LRRRC4  | T | C  | 0.874 | 0.713  | 0.161 | 9.27E-06 |       |        |       |          | 0.874 | 0.713  | 0.161 | 9.27E-06 | +? |
| rs114975594 | 21 | 46009991  | TSPEAR  | A | G  | 0.097 | 0.588  | 0.133 | 9.32E-06 |       |        |       |          | 0.097 | 0.588  | 0.133 | 9.32E-06 | +? |
| rs74569492  | 18 | 7371726   | TSPEAR  | A | C  | 0.021 | 1.078  | 0.243 | 9.34E-06 |       |        |       |          | 0.021 | 1.078  | 0.243 | 9.34E-06 | +? |
| rs77236103  | 18 | 7371868   |         | A | G  | 0.979 | -1.078 | 0.243 | 9.34E-06 |       |        |       |          | 0.979 | -1.078 | 0.243 | 9.34E-06 | -? |
| rs79085700  | 18 | 7371966   |         | A | G  | 0.979 | -1.078 | 0.243 | 9.34E-06 |       |        |       |          | 0.979 | -1.078 | 0.243 | 9.34E-06 | -? |
| rs79167849  | 18 | 7372024   |         | A | C  | 0.021 | 1.078  | 0.243 | 9.34E-06 |       |        |       |          | 0.021 | 1.078  | 0.243 | 9.34E-06 | +? |
| rs143604981 | 18 | 7372071   |         | T | C  | 0.979 | -1.078 | 0.243 | 9.34E-06 |       |        |       |          | 0.979 | -1.078 | 0.243 | 9.34E-06 | -? |
| rs145745578 | 18 | 7372077   |         | T | C  | 0.021 | 1.078  | 0.243 | 9.34E-06 |       |        |       |          | 0.021 | 1.078  | 0.243 | 9.34E-06 | +? |
| rs148540659 | 18 | 7372114   |         | T | C  | 0.979 | -1.078 | 0.243 | 9.34E-06 |       |        |       |          | 0.979 | -1.078 | 0.243 | 9.34E-06 | -? |
| rs141096077 | 18 | 7372258   |         | T | C  | 0.979 | -1.078 | 0.243 | 9.34E-06 |       |        |       |          | 0.979 | -1.078 | 0.243 | 9.34E-06 | -? |
| rs141927305 | 18 | 7372319   |         | A | G  | 0.021 | 1.078  | 0.243 | 9.34E-06 |       |        |       |          | 0.021 | 1.078  | 0.243 | 9.34E-06 | +? |
| rs74809813  | 18 | 7372418   |         | T | C  | 0.979 | -1.078 | 0.243 | 9.34E-06 |       |        |       |          | 0.979 | -1.078 | 0.243 | 9.34E-06 | -? |
| rs79490721  | 18 | 7372426   |         | A | C  | 0.979 | -1.078 | 0.243 | 9.34E-06 |       |        |       |          | 0.979 | -1.078 | 0.243 | 9.34E-06 | -? |
| rs75261297  | 18 | 7372478   |         | T | G  | 0.021 | 1.078  | 0.243 | 9.34E-06 |       |        |       |          | 0.021 | 1.078  | 0.243 | 9.34E-06 | +? |
| rs78278535  | 18 | 7372541   |         | T | G  | 0.979 | -1.078 | 0.243 | 9.34E-06 |       |        |       |          | 0.979 | -1.078 | 0.243 | 9.34E-06 | -? |



|             |    |           |          |    |      |       |        |       |          |       |        |       |          |       |        |       |          |    |
|-------------|----|-----------|----------|----|------|-------|--------|-------|----------|-------|--------|-------|----------|-------|--------|-------|----------|----|
| rs58731223  | 11 | 86433926  |          | CA | C    | 0.337 | 0.418  | 0.094 | 9.35E-06 |       |        |       |          | 0.337 | 0.418  | 0.094 | 9.35E-06 | ++ |
| rs73804436  | 4  | 24819266  | CCDC149  | A  | C    | 0.014 | 1.242  | 0.28  | 9.38E-06 |       |        |       |          | 0.013 | 1.242  | 0.28  | 9.38E-06 | ++ |
| rs11742479  | 5  | 178935867 |          | A  | G    | 0.666 | -0.413 | 0.093 | 9.47E-06 |       |        |       |          | 0.666 | -0.413 | 0.093 | 9.47E-06 | -? |
| rs57369579  | 6  | 42176743  | MRPS10   | T  | TG   | 0.765 | -0.448 | 0.101 | 9.48E-06 |       |        |       |          | 0.765 | -0.448 | 0.101 | 9.48E-06 | -? |
| rs149105997 | 18 | 27642914  |          | A  | G    | 0.014 | 1.203  | 0.288 | 2.87E-05 | 0.014 | 0.758  | 0.453 | 9.46E-02 | 0.014 | 1.075  | 0.243 | 9.51E-06 | ++ |
| rs13020623  | 2  | 181375915 |          | T  | C    | 0.814 | -0.331 | 0.11  | 2.54E-03 | 0.814 | -0.533 | 0.156 | 6.55E-04 | 0.814 | -0.397 | 0.09  | 9.54E-06 | -- |
| rs144346907 | 11 | 41164369  | LRRC4C   | A  | AT   | 0.126 | -0.712 | 0.161 | 9.55E-06 |       |        |       |          | 0.126 | -0.712 | 0.161 | 9.55E-06 | -? |
| rs199780898 | 11 | 41164371  | LRRC4C   | A  | G    | 0.126 | -0.712 | 0.161 | 9.55E-06 |       |        |       |          | 0.126 | -0.712 | 0.161 | 9.55E-06 | -? |
| rs4660821   | 1  | 45144850  | C1orf228 | T  | C    | 0.416 | 0.282  | 0.091 | 1.92E-03 | 0.437 | 0.405  | 0.124 | 1.12E-03 | 0.424 | 0.325  | 0.073 | 9.58E-06 | ++ |
| rs189111952 | 14 | 44541075  |          | A  | T    | 0.98  | -1.081 | 0.244 | 9.63E-06 |       |        |       |          | 0.98  | -1.081 | 0.244 | 9.63E-06 | -? |
| rs111854232 | 21 | 46011162  | TSPEAR   | T  | C    | 0.094 | 0.592  | 0.134 | 9.68E-06 |       |        |       |          | 0.094 | 0.592  | 0.134 | 9.68E-06 | ++ |
| rs10240142  | 7  | 129560225 | UBE2H    | T  | C    | 0.728 | 0.419  | 0.108 | 1.05E-04 | 0.732 | 0.351  | 0.163 | 3.11E-02 | 0.729 | 0.398  | 0.09  | 9.72E-06 | ++ |
| rs147325163 | 2  | 179833623 | CCDC141  | A  | G    | 0.031 | 0.916  | 0.201 | 5.11E-06 | 0.028 | 0.315  | 0.369 | 3.93E-01 | 0.031 | 0.779  | 0.176 | 1.02E-05 | ++ |
| rs150717437 | 21 | 46011250  | TSPEAR   | A  | G    | 0.098 | 0.587  | 0.133 | 1.03E-05 |       |        |       |          | 0.098 | 0.587  | 0.133 | 1.03E-05 | ++ |
| rs79382781  | 10 | 78113739  | C10orf11 | A  | T    | 0.932 | -0.661 | 0.153 | 1.53E-05 | 0.94  | -0.348 | 0.26  | 1.80E-01 | 0.934 | -0.581 | 0.132 | 1.05E-05 | -- |
| rs34760947  | 7  | 148980222 | ZNF783   | T  | C    | 0.202 | 0.408  | 0.105 | 1.02E-04 | 0.19  | 0.336  | 0.159 | 3.46E-02 | 0.199 | 0.386  | 0.088 | 1.05E-05 | ++ |
| rs13403531  | 2  | 725541    |          | A  | G    | 0.019 | 0.643  | 0.278 | 2.08E-02 | 0.013 | 1.868  | 0.417 | 7.58E-06 | 0.017 | 1.019  | 0.231 | 1.05E-05 | ++ |
| rs200347539 | 4  | 83732683  |          | G  | GCTT | 0.043 | 0.778  | 0.177 | 1.06E-05 |       |        |       |          | 0.043 | 0.778  | 0.177 | 1.06E-05 | ++ |
| rs78738570  | 20 | 1837957   |          | A  | G    | 0.017 | 1.15   | 0.261 | 1.06E-05 |       |        |       |          | 0.017 | 1.15   | 0.261 | 1.06E-05 | ++ |
| rs1407351   | 9  | 10166359  |          | T  | C    | 0.663 | -0.304 | 0.093 | 1.11E-03 | 0.647 | -0.401 | 0.133 | 2.57E-03 | 0.658 | -0.336 | 0.076 | 1.08E-05 | -- |
| rs527968368 | 17 | 1025083   | PTPRD    | A  | C    | 0.963 | -0.858 | 0.195 | 1.09E-05 |       |        |       |          | 0.963 | -0.858 | 0.195 | 1.09E-05 | -? |
| rs193033936 | 9  | 15413833  | ABR      | C  | G    | 0.978 | -0.966 | 0.22  | 1.11E-05 |       |        |       |          | 0.978 | -0.966 | 0.22  | 1.11E-05 | -? |
| rs7801603   | 7  | 129573322 | UBE2H    | A  | G    | 0.73  | 0.412  | 0.108 | 1.41E-04 | 0.734 | 0.365  | 0.166 | 2.75E-02 | 0.731 | 0.398  | 0.091 | 1.12E-05 | ++ |
| rs111355324 | 1  | 238648609 |          | A  | G    | 0.038 | 0.831  | 0.189 | 1.12E-05 |       |        |       |          | 0.038 | 0.831  | 0.189 | 1.12E-05 | ++ |
| rs269370    | 3  | 19858681  |          | T  | C    | 0.191 | 0.472  | 0.108 | 1.13E-05 |       |        |       |          | 0.191 | 0.472  | 0.108 | 1.13E-05 | ++ |
| rs116327582 | 7  | 142416842 |          | A  | G    | 0.988 | -1.251 | 0.285 | 1.13E-05 |       |        |       |          | 0.988 | -1.251 | 0.285 | 1.13E-05 | -? |
| rs12210021  | 6  | 47305805  |          | A  | G    | 0.166 | 0.347  | 0.117 | 3.02E-03 | 0.164 | 0.556  | 0.164 | 6.81E-04 | 0.166 | 0.418  | 0.095 | 1.14E-05 | ++ |
| rs11768305  | 7  | 156244159 |          | A  | G    | 0.175 | 0.345  | 0.107 | 1.22E-03 | 0.179 | 0.481  | 0.158 | 2.29E-03 | 0.177 | 0.388  | 0.088 | 1.15E-05 | ++ |

|             |    |           |          |    |                   |       |        |       |          |       |        |       |          |       |        |       |          |    |
|-------------|----|-----------|----------|----|-------------------|-------|--------|-------|----------|-------|--------|-------|----------|-------|--------|-------|----------|----|
| rs7237755   | 18 | 22604326  |          | T  | C                 | 0.491 | -0.388 | 0.093 | 2.97E-05 | 0.501 | -0.227 | 0.137 | 9.72E-02 | 0.494 | -0.338 | 0.077 | 1.15E-05 | -- |
| rs4800613   | 18 | 22607723  |          | A  | G                 | 0.509 | 0.388  | 0.093 | 2.97E-05 | 0.499 | 0.227  | 0.137 | 9.72E-02 | 0.506 | 0.338  | 0.077 | 1.15E-05 | ++ |
| rs79125076  | 19 | 13657260  | CACNA1A  | A  | C                 | 0.928 | -0.653 | 0.149 | 1.15E-05 |       |        |       |          | 0.928 | -0.653 | 0.149 | 1.15E-05 | -? |
| rs116899926 | 7  | 120903368 | CPED1    | C  | G                 | 0.99  | -1.408 | 0.321 | 1.15E-05 |       |        |       |          | 0.99  | -1.408 | 0.321 | 1.15E-05 | -? |
| rs143859751 | 10 | 58534221  |          | A  | G                 | 0.984 | -0.873 | 0.287 | 2.36E-03 | 0.982 | -1.314 | 0.4   | 1.02E-03 | 0.984 | -1.023 | 0.233 | 1.15E-05 | -- |
| rs512296    | 6  | 125430128 |          | T  | C                 | 0.681 | -0.353 | 0.094 | 1.84E-04 | 0.665 | -0.316 | 0.137 | 2.14E-02 | 0.676 | -0.341 | 0.078 | 1.16E-05 | -- |
| rs4660822   | 1  | 45144856  | C1orf228 | A  | G                 | 0.583 | -0.277 | 0.091 | 2.28E-03 | 0.563 | -0.405 | 0.124 | 1.12E-03 | 0.576 | -0.322 | 0.073 | 1.16E-05 | -- |
| rs75183205  | 7  | 77962515  | MAGI2    | A  | G                 | 0.012 | 0.885  | 0.325 | 6.45E-03 | 0.016 | 1.365  | 0.383 | 3.63E-04 | 0.013 | 1.086  | 0.248 | 1.17E-05 | ++ |
| rs17150545  | 7  | 77963011  | MAGI2    | T  | C                 | 0.988 | -0.885 | 0.325 | 6.45E-03 | 0.984 | -1.365 | 0.383 | 3.63E-04 | 0.987 | -1.086 | 0.248 | 1.17E-05 | -- |
| rs75623315  | 7  | 77964777  | MAGI2    | C  | G                 | 0.988 | -0.885 | 0.325 | 6.45E-03 | 0.984 | -1.365 | 0.383 | 3.63E-04 | 0.987 | -1.086 | 0.248 | 1.17E-05 | -- |
| rs10025514  | 4  | 114786768 | MAGI2    | T  | C                 | 0.968 | -0.837 | 0.202 | 3.38E-05 | 0.963 | -0.506 | 0.3   | 9.16E-02 | 0.967 | -0.734 | 0.168 | 1.18E-05 | -- |
| rs868256    | 4  | 4852156   |          | A  | G                 | 0.924 | -0.417 | 0.149 | 5.19E-03 | 0.901 | -0.679 | 0.192 | 3.96E-04 | 0.915 | -0.516 | 0.118 | 1.18E-05 | -- |
| rs115032837 | 8  | 3610483   |          | A  | T                 | 0.05  | 0.758  | 0.173 | 1.19E-05 |       |        |       |          | 0.05  | 0.758  | 0.173 | 1.19E-05 | +? |
| rs201273544 | 9  | 106828888 | CSMD1    | A  | AAGA<br>GACT<br>G | 0.104 | 0.475  | 0.125 | 1.52E-04 | 0.085 | 0.485  | 0.221 | 2.81E-02 | 0.1   | 0.477  | 0.109 | 1.20E-05 | ++ |
| rs35621087  | 10 | 1181739   |          | CT | C                 | 0.272 | 0.406  | 0.096 | 2.51E-05 | 0.302 | 0.221  | 0.136 | 1.04E-01 | 0.282 | 0.344  | 0.079 | 1.20E-05 | ++ |
| rs10980872  | 9  | 99913443  |          | T  | C                 | 0.324 | 0.407  | 0.093 | 1.21E-05 |       |        |       |          | 0.324 | 0.407  | 0.093 | 1.21E-05 | +? |
| rs16933471  | 10 | 78142829  | C10orf11 | T  | C                 | 0.059 | 0.683  | 0.164 | 3.03E-05 | 0.049 | 0.431  | 0.281 | 1.25E-01 | 0.056 | 0.619  | 0.141 | 1.21E-05 | ++ |
| rs116100498 | 7  | 51809381  |          | T  | G                 | 0.934 | -0.669 | 0.153 | 1.22E-05 |       |        |       |          | 0.934 | -0.669 | 0.153 | 1.22E-05 | -? |
| rs4963941   | 12 | 26099201  |          | T  | C                 | 0.03  | 0.394  | 0.248 | 1.12E-01 | 0.036 | 1.257  | 0.267 | 2.45E-06 | 0.033 | 0.794  | 0.182 | 1.23E-05 | ++ |
| rs72772400  | 10 | 5865257   | GD12     | T  | C                 | 0.95  | -0.638 | 0.171 | 1.95E-04 | 0.942 | -0.54  | 0.234 | 2.10E-02 | 0.947 | -0.604 | 0.138 | 1.24E-05 | -- |
| rs13402242  | 2  | 232029568 | PSMD1    | A  | G                 | 0.844 | -0.375 | 0.11  | 6.87E-04 | 0.842 | -0.459 | 0.165 | 5.40E-03 | 0.843 | -0.401 | 0.092 | 1.25E-05 | -- |
| rs16933248  | 10 | 78072512  | C10orf11 | T  | C                 | 0.071 | 0.618  | 0.151 | 4.47E-05 | 0.06  | 0.428  | 0.254 | 9.26E-02 | 0.068 | 0.568  | 0.13  | 1.25E-05 | ++ |
| rs35296561  | 8  | 61883600  |          | CT | C                 | 0.368 | -0.351 | 0.092 | 1.41E-04 | 0.429 | -0.277 | 0.127 | 2.88E-02 | 0.389 | -0.326 | 0.075 | 1.28E-05 | -- |
| rs565389564 | 18 | 46129438  |          | G  | GTGG<br>A         | 0.019 | 1.108  | 0.254 | 1.28E-05 |       |        |       |          | 0.019 | 1.108  | 0.254 | 1.28E-05 | +? |
| rs13010533  | 2  | 181386683 | CTIF     | T  | G                 | 0.827 | -0.354 | 0.111 | 1.49E-03 | 0.825 | -0.498 | 0.162 | 2.07E-03 | 0.827 | -0.4   | 0.092 | 1.29E-05 | -- |
| rs9664798   | 10 | 78111873  | C10orf11 | A  | G                 | 0.931 | -0.653 | 0.153 | 1.94E-05 | 0.94  | -0.348 | 0.26  | 1.80E-01 | 0.933 | -0.575 | 0.132 | 1.29E-05 | -- |
| rs10216157  | 7  | 129528319 | UBE2H    | C  | G                 | 0.73  | 0.412  | 0.109 | 1.53E-04 | 0.734 | 0.357  | 0.163 | 2.90E-02 | 0.732 | 0.395  | 0.09  | 1.29E-05 | ++ |

|             |    |           |        |    |    |       |        |       |          |       |        |       |          |       |        |       |          |    |
|-------------|----|-----------|--------|----|----|-------|--------|-------|----------|-------|--------|-------|----------|-------|--------|-------|----------|----|
| rs554295044 | 13 | 53759775  |        | A  | AC | 0.985 | -0.889 | 0.305 | 3.52E-03 | 0.988 | -1.354 | 0.402 | 7.54E-04 | 0.986 | -1.059 | 0.243 | 1.30E-05 | -- |
| rs61045241  | 7  | 97640967  |        | T  | C  | 0.714 | 0.375  | 0.099 | 1.49E-04 | 0.739 | 0.364  | 0.17  | 3.16E-02 | 0.721 | 0.373  | 0.086 | 1.31E-05 | ++ |
| rs11817495  | 10 | 133251360 |        | A  | G  | 0.011 | 1.047  | 0.325 | 1.26E-03 | 0.011 | 1.399  | 0.467 | 2.74E-03 | 0.011 | 1.162  | 0.267 | 1.31E-05 | ++ |
| rs76586525  | 19 | 46720605  |        | T  | C  | 0.989 | -1.378 | 0.316 | 1.33E-05 |       |        |       |          | 0.989 | -1.378 | 0.317 | 1.33E-05 | -? |
| rs140791899 | 19 | 46725285  |        | CA | C  | 0.989 | -1.378 | 0.316 | 1.33E-05 |       |        |       |          | 0.989 | -1.378 | 0.317 | 1.33E-05 | -? |
| rs191791711 | 1  | 175217491 |        | T  | C  | 0.989 | -1.344 | 0.309 | 1.34E-05 |       |        |       |          | 0.989 | -1.344 | 0.309 | 1.34E-05 | -? |
| rs189646905 | 1  | 175218407 |        | T  | G  | 0.011 | 1.344  | 0.309 | 1.34E-05 |       |        |       |          | 0.011 | 1.344  | 0.309 | 1.34E-05 | ++ |
| rs2600749   | 2  | 237609991 |        | A  | C  | 0.557 | -0.393 | 0.09  | 1.36E-05 |       |        |       |          | 0.557 | -0.393 | 0.09  | 1.36E-05 | -? |
| rs7525994   | 1  | 160676947 |        | T  | C  | 0.036 | 0.852  | 0.196 | 1.37E-05 |       |        |       |          | 0.036 | 0.852  | 0.196 | 1.37E-05 | ++ |
| rs7548088   | 1  | 160677259 | CD48   | A  | G  | 0.036 | 0.852  | 0.196 | 1.37E-05 |       |        |       |          | 0.036 | 0.852  | 0.196 | 1.37E-05 | ++ |
| rs571731771 | 3  | 87894018  | CD48   | A  | G  | 0.016 | 0.803  | 0.275 | 3.53E-03 | 0.019 | 1.245  | 0.37  | 7.70E-04 | 0.017 | 0.961  | 0.221 | 1.37E-05 | ++ |
| rs200313400 | 15 | 44001693  |        | CA | C  | 0.049 | 0.813  | 0.173 | 2.63E-06 | 0.042 | 0.155  | 0.31  | 6.16E-01 | 0.047 | 0.656  | 0.151 | 1.39E-05 | ++ |
| rs34838451  | 11 | 87862535  | STRC   | A  | G  | 0.037 | 0.896  | 0.197 | 5.52E-06 | 0.026 | 0.247  | 0.389 | 5.25E-01 | 0.035 | 0.764  | 0.176 | 1.42E-05 | ++ |
| rs9953030   | 18 | 22609639  | RAB38  | A  | G  | 0.475 | 0.382  | 0.091 | 2.54E-05 | 0.473 | 0.209  | 0.142 | 1.42E-01 | 0.474 | 0.332  | 0.076 | 1.42E-05 | ++ |
| rs12933234  | 16 | 27981362  |        | A  | T  | 0.273 | 0.415  | 0.101 | 3.98E-05 | 0.268 | 0.24   | 0.139 | 8.35E-02 | 0.271 | 0.354  | 0.082 | 1.42E-05 | ++ |
| rs12933235  | 16 | 27981363  | GSG1L  | T  | G  | 0.727 | -0.415 | 0.101 | 3.98E-05 | 0.732 | -0.24  | 0.139 | 8.35E-02 | 0.729 | -0.354 | 0.082 | 1.42E-05 | -- |
| rs55845359  | 16 | 27981644  | GSG1L  | A  | G  | 0.727 | -0.415 | 0.101 | 3.98E-05 | 0.732 | -0.24  | 0.139 | 8.35E-02 | 0.729 | -0.354 | 0.082 | 1.42E-05 | -- |
| rs4572960   | 5  | 51572584  | GSG1L  | T  | C  | 0.402 | 0.224  | 0.095 | 1.84E-02 | 0.417 | 0.511  | 0.125 | 4.66E-05 | 0.408 | 0.329  | 0.076 | 1.43E-05 | ++ |
| rs190533586 | 1  | 156160458 |        | T  | C  |       |        |       |          | 0.012 | 1.887  | 0.435 | 1.43E-05 | 0.012 | 1.886  | 0.435 | 1.43E-05 | ?+ |
| rs75272883  | 2  | 59610249  |        | T  | C  | 0.986 | -1.154 | 0.281 | 3.88E-05 | 0.986 | -0.723 | 0.454 | 1.11E-01 | 0.986 | -1.035 | 0.239 | 1.44E-05 | -- |
| rs11265621  | 1  | 154442960 |        | A  | G  | 0.373 | -0.308 | 0.093 | 9.29E-04 | 0.39  | -0.402 | 0.141 | 4.28E-03 | 0.378 | -0.337 | 0.078 | 1.44E-05 | -- |
| rs2929380   | 3  | 19941458  | SHE    | A  | G  | 0.192 | 0.458  | 0.104 | 1.01E-05 | 0.197 | 0.186  | 0.162 | 2.53E-01 | 0.194 | 0.379  | 0.087 | 1.44E-05 | ++ |
| rs188075933 | 4  | 158095783 | EFHB   | T  | G  | 0.983 | -1.118 | 0.249 | 7.15E-06 | 0.986 | -0.313 | 0.577 | 5.88E-01 | 0.983 | -0.992 | 0.229 | 1.45E-05 | -- |
| rs74079527  | 1  | 63473031  |        | T  | C  | 0.078 | 0.61   | 0.141 | 1.45E-05 |       |        |       |          | 0.078 | 0.61   | 0.141 | 1.45E-05 | ++ |
| rs192300427 | 10 | 122019656 |        | A  | T  | 0.984 | -1.039 | 0.27  | 1.22E-04 | 0.988 | -1.017 | 0.507 | 4.46E-02 | 0.985 | -1.034 | 0.239 | 1.45E-05 | -- |
| rs6844034   | 4  | 59833690  |        | T  | G  | 0.311 | 0.358  | 0.095 | 1.80E-04 | 0.307 | 0.306  | 0.139 | 2.75E-02 | 0.309 | 0.341  | 0.079 | 1.45E-05 | ++ |
| rs114521859 | 21 | 46010602  | TSPEAR | T  | G  | 0.907 | -0.582 | 0.134 | 1.45E-05 |       |        |       |          | 0.907 | -0.582 | 0.134 | 1.45E-05 | -? |
| rs78872057  | 18 | 68457556  | R      | A  | T  | 0.022 | 0.98   | 0.226 | 1.46E-05 |       |        |       |          | 0.022 | 0.98   | 0.226 | 1.46E-05 | ++ |

|             |    |           |            |   |     |       |        |       |          |       |        |       |          |       |        |       |          |    |
|-------------|----|-----------|------------|---|-----|-------|--------|-------|----------|-------|--------|-------|----------|-------|--------|-------|----------|----|
| rs1198415   | 14 | 82910064  |            | A | G   | 0.273 | 0.306  | 0.096 | 1.48E-03 | 0.272 | 0.428  | 0.141 | 2.43E-03 | 0.272 | 0.345  | 0.08  | 1.46E-05 | ++ |
| rs549695780 | 1  | 225285904 | DNAH14     | G | GA  | 0.222 | -0.49  | 0.118 | 3.11E-05 | 0.242 | -0.266 | 0.163 | 1.03E-01 | 0.229 | -0.413 | 0.095 | 1.49E-05 | -- |
| rs74365341  | 6  | 17297964  |            | A | C   | 0.013 | 1.27   | 0.293 | 1.49E-05 |       |        |       |          | 0.013 | 1.27   | 0.293 | 1.49E-05 | +  |
| rs74733341  | 6  | 17299306  |            | T | C   | 0.013 | 1.27   | 0.293 | 1.49E-05 |       |        |       |          | 0.013 | 1.27   | 0.293 | 1.49E-05 | +  |
| rs111227041 | 6  | 17302215  |            | C | G   | 0.987 | -1.27  | 0.293 | 1.49E-05 |       |        |       |          | 0.987 | -1.27  | 0.293 | 1.49E-05 | -? |
| rs77701626  | 6  | 17304052  |            | T | C   | 0.987 | -1.27  | 0.293 | 1.49E-05 |       |        |       |          | 0.987 | -1.27  | 0.293 | 1.49E-05 | -? |
| rs70999394  | 6  | 17304528  |            | T | TCA | 0.987 | -1.27  | 0.293 | 1.49E-05 |       |        |       |          | 0.987 | -1.27  | 0.293 | 1.49E-05 | -? |
| rs116339771 | 12 | 101377122 | ANO4       | A | G   | 0.038 | 0.603  | 0.19  | 1.48E-03 | 0.039 | 0.866  | 0.285 | 2.38E-03 | 0.038 | 0.684  | 0.158 | 1.49E-05 | ++ |
| rs74875220  | 11 | 8302036   |            | T | C   | 0.964 | -0.869 | 0.201 | 1.50E-05 |       |        |       |          | 0.964 | -0.869 | 0.201 | 1.50E-05 | -? |
| rs703605    | 12 | 103995659 | STAB2      | A | G   | 0.198 | 0.335  | 0.102 | 1.01E-03 | 0.181 | 0.464  | 0.16  | 3.77E-03 | 0.193 | 0.372  | 0.086 | 1.50E-05 | ++ |
| rs363374    | 10 | 118993483 |            | A | G   | 0.293 | 0.427  | 0.099 | 1.51E-05 |       |        |       |          | 0.293 | 0.427  | 0.099 | 1.51E-05 | +  |
| rs690874    | 7  | 49870026  |            | A | G   | 0.136 | -0.693 | 0.16  | 1.52E-05 |       |        |       |          | 0.136 | -0.693 | 0.16  | 1.52E-05 | -? |
| rs9423376   | 10 | 4834556   | VWC2AKR1E2 | T | C   | 0.255 | 0.35   | 0.103 | 6.67E-04 | 0.261 | 0.365  | 0.137 | 7.70E-03 | 0.257 | 0.356  | 0.082 | 1.55E-05 | ++ |
| rs75729329  | 18 | 68492090  |            | T | G   | 0.02  | 1.031  | 0.239 | 1.60E-05 |       |        |       |          | 0.02  | 1.031  | 0.239 | 1.60E-05 | +  |
| rs76115917  | 18 | 68492666  |            | A | G   | 0.98  | -1.031 | 0.239 | 1.60E-05 |       |        |       |          | 0.98  | -1.031 | 0.239 | 1.60E-05 | -? |
| rs74686437  | 18 | 68493130  |            | T | C   | 0.98  | -1.031 | 0.239 | 1.60E-05 |       |        |       |          | 0.98  | -1.031 | 0.239 | 1.60E-05 | -? |
| rs76494002  | 18 | 68493957  |            | A | G   | 0.98  | -1.031 | 0.239 | 1.60E-05 |       |        |       |          | 0.98  | -1.031 | 0.239 | 1.60E-05 | -? |
| rs142360392 | 18 | 46121359  |            | T | C   | 0.019 | 1.095  | 0.254 | 1.61E-05 |       |        |       |          | 0.019 | 1.095  | 0.254 | 1.61E-05 | +  |
| rs199655286 | 3  | 87879869  | CTIF       | G | GA  | 0.016 | 0.788  | 0.274 | 4.05E-03 | 0.019 | 1.245  | 0.37  | 7.70E-04 | 0.017 | 0.95   | 0.22  | 1.62E-05 | ++ |
| rs13071420  | 3  | 168981877 | MECOM      | T | C   | 0.79  | -0.454 | 0.105 | 1.63E-05 |       |        |       |          | 0.79  | -0.454 | 0.105 | 1.63E-05 | -? |
| rs189254565 | 4  | 83790534  | SEC31A     | T | C   | 0.04  | 0.8    | 0.182 | 1.04E-05 | 0.033 | 0.307  | 0.325 | 3.44E-01 | 0.038 | 0.683  | 0.158 | 1.64E-05 | ++ |
| rs73188567  | 8  | 8376863   |            | A | T   | 0.049 | 0.517  | 0.176 | 3.33E-03 | 0.049 | 0.778  | 0.237 | 1.05E-03 | 0.049 | 0.61   | 0.141 | 1.64E-05 | ++ |
| rs112372099 | 7  | 129572114 |            | A | C   | 0.249 | -0.434 | 0.11  | 8.58E-05 | 0.252 | -0.31  | 0.165 | 6.10E-02 | 0.25  | -0.396 | 0.092 | 1.66E-05 | -- |
| rs145950432 | 2  | 184641814 | UBE2H      | T | C   | 0.018 | 0.729  | 0.275 | 8.04E-03 | 0.011 | 1.661  | 0.431 | 1.18E-04 | 0.016 | 0.999  | 0.232 | 1.67E-05 | ++ |
| rs115521622 | 5  | 10365654  |            | T | C   | 0.057 | 0.709  | 0.165 | 1.67E-05 |       |        |       |          | 0.057 | 0.709  | 0.165 | 1.67E-05 | +  |
| rs10103425  | 8  | 61880958  |            | T | C   | 0.554 | 0.374  | 0.087 | 1.68E-05 |       |        |       |          | 0.554 | 0.374  | 0.087 | 1.68E-05 | +  |
| rs10110804  | 8  | 61882557  |            | T | C   | 0.554 | 0.374  | 0.087 | 1.68E-05 |       |        |       |          | 0.554 | 0.374  | 0.087 | 1.68E-05 | +  |
| rs12428701  | 13 | 108086788 | FAM155A    | T | G   | 0.789 | -0.402 | 0.106 | 1.46E-04 | 0.793 | -0.317 | 0.153 | 3.80E-02 | 0.79  | -0.374 | 0.087 | 1.69E-05 | -- |

|             |    |           |      |      |       |        |       |          |       |        |       |          |       |        |       |          |    |
|-------------|----|-----------|------|------|-------|--------|-------|----------|-------|--------|-------|----------|-------|--------|-------|----------|----|
| rs1815102   | 7  | 97642988  | A    | G    | 0.274 | -0.378 | 0.099 | 1.39E-04 | 0.247 | -0.346 | 0.173 | 4.52E-02 | 0.267 | -0.37  | 0.086 | 1.70E-05 | -- |
| rs115433897 | 7  | 68092763  | T    | C    | 0.028 | 0.822  | 0.213 | 1.16E-04 | 0.031 | 0.649  | 0.332 | 5.06E-02 | 0.029 | 0.772  | 0.179 | 1.70E-05 | ++ |
| rs77348404  | 1  | 160678066 | C    | G    | 0.037 | 0.843  | 0.196 | 1.71E-05 |       |        |       |          | 0.037 | 0.843  | 0.196 | 1.71E-05 | +  |
| rs10059711  | 5  | 51551758  | T    | C    | 0.41  | 0.236  | 0.094 | 1.22E-02 | 0.42  | 0.521  | 0.133 | 9.38E-05 | 0.413 | 0.33   | 0.077 | 1.72E-05 | ++ |
| rs192081737 | 4  | 47748379  | T    | C    | 0.989 | -0.952 | 0.312 | 2.29E-03 | 0.985 | -1.147 | 0.376 | 2.26E-03 | 0.987 | -1.032 | 0.24  | 1.73E-05 | -- |
| rs7147005   | 14 | 98473288  | A    | G    | 0.334 | 0.315  | 0.098 | 1.25E-03 | 0.348 | 0.413  | 0.143 | 3.81E-03 | 0.339 | 0.346  | 0.081 | 1.73E-05 | ++ |
| rs62489374  | 7  | 129581482 | T    | C    | 0.728 | 0.408  | 0.107 | 1.44E-04 | 0.732 | 0.329  | 0.161 | 4.10E-02 | 0.729 | 0.384  | 0.089 | 1.73E-05 | ++ |
| rs187874943 | 12 | 4844565   | T    | C    | 0.968 | -0.405 | 0.226 | 7.38E-02 | 0.975 | -1.587 | 0.322 | 8.32E-07 | 0.97  | -0.796 | 0.185 | 1.74E-05 | -- |
| rs28580019  | 18 | 22610199  | T    | C    | 0.524 | -0.378 | 0.091 | 3.13E-05 | 0.526 | -0.208 | 0.143 | 1.45E-01 | 0.525 | -0.329 | 0.077 | 1.74E-05 | -- |
| rs4860464   | 4  | 59832534  | A    | T    | 0.313 | 0.355  | 0.095 | 1.98E-04 | 0.308 | 0.302  | 0.14  | 3.07E-02 | 0.311 | 0.338  | 0.079 | 1.77E-05 | ++ |
| rs7186668   | 16 | 86522899  | C    | G    | 0.651 | -0.294 | 0.092 | 1.34E-03 | 0.616 | -0.395 | 0.135 | 3.53E-03 | 0.64  | -0.326 | 0.076 | 1.77E-05 | -- |
| rs116219705 | 7  | 13100672  | T    | C    | 0.978 | -1.027 | 0.239 | 1.78E-05 |       |        |       |          | 0.978 | -1.027 | 0.239 | 1.78E-05 | -? |
| rs12813085  | 12 | 68617828  | T    | C    | 0.055 | 0.677  | 0.158 | 1.78E-05 |       |        |       |          | 0.055 | 0.677  | 0.158 | 1.78E-05 | +  |
| rs184756085 | 4  | 83786479  | A    | G    | 0.984 | -1.145 | 0.267 | 1.79E-05 |       |        |       |          | 0.984 | -1.145 | 0.267 | 1.79E-05 | -? |
| rs143840340 | 2  | 10583762  | A    | G    | 0.013 | 1.232  | 0.287 | 1.81E-05 |       |        |       |          | 0.013 | 1.232  | 0.287 | 1.81E-05 | +  |
| rs144229860 | 2  | 10587373  | G    | GTCA | 0.013 | 1.232  | 0.287 | 1.81E-05 |       |        |       |          | 0.013 | 1.232  | 0.287 | 1.81E-05 | +  |
| rs113131728 | 1  | 219680667 | T    | G    | 0.054 | -0.919 | 0.272 | 7.11E-04 | 0.052 | -1.426 | 0.515 | 5.59E-03 | 0.054 | -1.03  | 0.24  | 1.81E-05 | -- |
| rs2136601   | 10 | 1180935   | A    | G    | 0.742 | -0.366 | 0.097 | 1.69E-04 | 0.713 | -0.288 | 0.137 | 3.52E-02 | 0.732 | -0.34  | 0.079 | 1.82E-05 | -- |
| rs55859212  | 14 | 92988685  | T    | C    | 0.478 | 0.38   | 0.099 | 1.20E-04 | 0.514 | 0.28   | 0.141 | 4.78E-02 | 0.49  | 0.347  | 0.081 | 1.82E-05 | ++ |
| rs11735450  | 4  | 59835392  | T    | C    | 0.313 | 0.356  | 0.095 | 1.84E-04 | 0.31  | 0.294  | 0.138 | 3.38E-02 | 0.312 | 0.336  | 0.078 | 1.83E-05 | ++ |
| rs377744015 | 10 | 107041782 | CTTC | C    | 0.606 | 0.398  | 0.093 | 1.85E-05 |       |        |       |          | 0.606 | 0.398  | 0.093 | 1.85E-05 | +  |
| rs77881904  | 3  | 142619764 | T    | C    | 0.909 | -0.544 | 0.133 | 4.36E-05 | 0.915 | -0.331 | 0.217 | 1.27E-01 | 0.911 | -0.486 | 0.114 | 1.85E-05 | -- |
| rs4788016   | 16 | 27976503  | T    | C    | 0.185 | 0.43   | 0.109 | 8.26E-05 | 0.192 | 0.278  | 0.148 | 6.11E-02 | 0.188 | 0.377  | 0.088 | 1.86E-05 | ++ |
| rs35588287  | 16 | 27977832  | CAA  | C    | 0.79  | -0.375 | 0.106 | 3.96E-04 | 0.785 | -0.339 | 0.14  | 1.58E-02 | 0.788 | -0.362 | 0.085 | 1.86E-05 | -- |
| rs1358727   | 6  | 150504354 | A    | G    | 0.711 | 0.378  | 0.106 | 3.46E-04 | 0.705 | 0.351  | 0.149 | 1.85E-02 | 0.709 | 0.369  | 0.086 | 1.86E-05 | ++ |
| rs869104053 | 6  | 120603039 | CA   | C    | 0.423 | 0.391  | 0.091 | 1.86E-05 |       |        |       |          | 0.423 | 0.391  | 0.091 | 1.86E-05 | +  |
| rs2349238   | 8  | 61883127  | C    | G    | 0.368 | -0.338 | 0.091 | 2.23E-04 | 0.429 | -0.279 | 0.127 | 2.78E-02 | 0.389 | -0.318 | 0.074 | 1.87E-05 | -- |

|             |    |           |        |       |   |       |        |        |          |          |        |       |          |        |        |          |          |     |
|-------------|----|-----------|--------|-------|---|-------|--------|--------|----------|----------|--------|-------|----------|--------|--------|----------|----------|-----|
| rs143523331 | 4  | 158084289 | GLRB   | T     | C | 0.018 | 1.066  | 0.249  | 1.88E-05 |          |        |       |          | 0.018  | 1.066  | 0.249    | 1.88E-05 | ++? |
| rs9743857   | 14 | 98470051  |        | T     | G | 0.333 | 0.309  | 0.098  | 1.51E-03 | 0.347    | 0.419  | 0.143 | 3.29E-03 | 0.338  | 0.344  | 0.081    | 1.88E-05 | ++  |
| rs9743860   | 14 | 98470078  |        | A     | G | 0.333 | 0.309  | 0.098  | 1.51E-03 | 0.347    | 0.419  | 0.143 | 3.29E-03 | 0.338  | 0.344  | 0.081    | 1.88E-05 | ++  |
| rs13231525  | 7  | 149011410 |        | T     | C | 0.076 | 0.583  | 0.147  | 7.20E-05 | 0.056    | 0.434  | 0.261 | 9.59E-02 | 0.071  | 0.547  | 0.128    | 1.90E-05 | ++  |
| rs28515968  | 14 | 86001049  | FLRT2  | T     | G | 0.076 | -0.729 | 0.216  | 7.50E-04 | 0.062    | -1.134 | 0.409 | 5.58E-03 | 0.073  | -0.817 | 0.191    | 1.91E-05 | --  |
| rs74721198  | 3  | 4775378   |        | ITPR1 | A | G     | 0.976  | -0.983 | 0.23     | 1.92E-05 |        |       |          | 0.976  | -0.983 | 0.23     | 1.92E-05 | -?  |
| rs74324161  | 11 | 12567697  | A      |       | G | 0.202 | 0.439  | 0.103  | 1.92E-05 |          |        |       | 0.202    | 0.439  | 0.103  | 1.92E-05 | ++?      |     |
| rs75295605  | 5  | 105934787 | A      |       | G | 0.91  | -0.574 | 0.134  | 1.93E-05 |          |        |       | 0.91     | -0.574 | 0.134  | 1.93E-05 | -?       |     |
| rs75723213  | 10 | 48543372  |        | A     | T | 0.011 | 1.262  | 0.295  | 1.93E-05 |          |        |       | 0.011    | 1.262  | 0.295  | 1.93E-05 | ++?      |     |
| rs10101707  | 8  | 61883621  |        | T     | C | 0.368 | -0.338 | 0.091  | 2.23E-04 | 0.429    | -0.277 | 0.127 | 2.90E-02 | 0.389  | -0.317 | 0.074    | 1.94E-05 | --  |
| rs77161426  | 18 | 31385009  |        | T     | C |       |        |        |          | 0.989    | -1.801 | 0.422 | 1.94E-05 | 0.989  | -1.801 | 0.422    | 1.94E-05 | ?-  |
| rs116983213 | 18 | 31385088  |        | T     | G |       |        |        |          | 0.989    | -1.801 | 0.422 | 1.94E-05 | 0.989  | -1.801 | 0.422    | 1.94E-05 | ?-  |
| rs142463700 | 18 | 31387330  |        | T     | C |       |        |        |          | 0.989    | -1.801 | 0.422 | 1.94E-05 | 0.989  | -1.801 | 0.422    | 1.94E-05 | ?-  |
| rs28637115  | 22 | 50342638  |        | A     | G | 0.281 | 0.429  | 0.1    | 1.95E-05 |          |        |       | 0.281    | 0.429  | 0.1    | 1.95E-05 | ++?      |     |
| rs79584851  | 13 | 102142652 | ITGBL1 | A     | G | 0.054 | 0.522  | 0.169  | 1.95E-03 | 0.048    | 0.739  | 0.244 | 2.46E-03 | 0.052  | 0.592  | 0.139    | 1.96E-05 | ++  |
| rs10253233  | 7  | 129542761 |        | A     | C | 0.249 | -0.428 | 0.11   | 1.00E-04 | 0.256    | -0.303 | 0.162 | 6.10E-02 | 0.251  | -0.389 | 0.091    | 1.96E-05 | --  |
| rs12747682  | 1  | 19354505  | UBE2H  | A     | G | 0.919 | -0.591 | 0.151  | 9.36E-05 | 0.904    | -0.404 | 0.218 | 6.36E-02 | 0.914  | -0.53  | 0.124    | 1.98E-05 | --  |
| rs60907340  | 10 | 122669855 |        | CAG   | C | 0.633 | -0.278 | 0.091  | 2.39E-03 | 0.659    | -0.411 | 0.132 | 1.88E-03 | 0.642  | -0.321 | 0.075    | 1.99E-05 | --  |
| rs6924223   | 6  | 47309130  |        | A     | T | 0.152 | 0.347  | 0.121  | 4.18E-03 | 0.144    | 0.564  | 0.17  | 8.81E-04 | 0.149  | 0.421  | 0.099    | 2.00E-05 | ++  |
| rs185820158 | 7  | 68116729  |        | A     | T | 0.029 | 0.803  | 0.213  | 1.58E-04 | 0.028    | 0.692  | 0.347 | 4.62E-02 | 0.029  | 0.773  | 0.181    | 2.01E-05 | ++  |
| rs140439453 | 20 | 9919198   |        | A     | G | 0.012 | 1.276  | 0.3    | 2.04E-05 |          |        |       | 0.012    | 1.276  | 0.3    | 2.04E-05 | ++?      |     |
| rs75126122  | 10 | 16580055  |        | T     | C | 0.986 | -1.201 | 0.282  | 2.06E-05 |          |        |       | 0.986    | -1.201 | 0.282  | 2.06E-05 | -?       |     |
| rs1490862   | 16 | 86524159  |        | T     | C | 0.343 | 0.276  | 0.092  | 2.67E-03 | 0.38     | 0.434  | 0.137 | 1.55E-03 | 0.355  | 0.325  | 0.076    | 2.07E-05 | ++  |
| rs142177056 | 6  | 154541085 | OPRM1  | A     | C | 0.027 | 0.988  | 0.22   | 7.11E-06 | 0.013    | 0.128  | 0.55  | 8.16E-01 | 0.025  | 0.869  | 0.204    | 2.08E-05 | ++  |
| rs72962525  | 18 | 68773265  |        | A     | G | 0.053 | 0.74   | 0.17   | 1.29E-05 | 0.059    | 0.287  | 0.263 | 2.77E-01 | 0.055  | 0.607  | 0.143    | 2.08E-05 | ++  |
| rs10903375  | 10 | 1180536   |        | A     | G | 0.743 | -0.367 | 0.098  | 1.88E-04 | 0.712    | -0.288 | 0.138 | 3.63E-02 | 0.733  | -0.34  | 0.08     | 2.08E-05 | --  |
| rs56338410  | 9  | 97436423  |        | T     | C | 0.973 | -0.636 | 0.237  | 7.19E-03 | 0.964    | -0.938 | 0.276 | 6.68E-04 | 0.97   | -0.765 | 0.18     | 2.09E-05 | --  |
| rs67845333  | 9  | 97438758  |        | A     | G | 0.027 | 0.636  | 0.237  | 7.19E-03 | 0.036    | 0.938  | 0.276 | 6.68E-04 | 0.03   | 0.765  | 0.18     | 2.09E-05 | ++  |



|             |    |           |            |     |      |       |        |       |          |       |        |       |          |       |        |       |          |     |
|-------------|----|-----------|------------|-----|------|-------|--------|-------|----------|-------|--------|-------|----------|-------|--------|-------|----------|-----|
| rs61358838  | 2  | 184647305 |            | G   | GCCG | 0.982 | -0.705 | 0.274 | 1.01E-02 | 0.989 | -1.661 | 0.431 | 1.18E-04 | 0.984 | -0.981 | 0.232 | 2.28E-05 | --  |
| rs76171415  | 14 | 78688399  |            | A   | G    |       |        |       |          | 0.989 | -1.71  | 0.404 | 2.28E-05 | 0.989 | -1.71  | 0.404 | 2.28E-05 | ?-  |
| rs35060589  | 9  | 97447390  |            | T   | C    | 0.973 | -0.643 | 0.237 | 6.65E-03 | 0.964 | -0.917 | 0.275 | 8.48E-04 | 0.969 | -0.759 | 0.179 | 2.30E-05 | --  |
| rs12461351  | 19 | 46696941  |            | C   | G    | 0.984 | -1.126 | 0.266 | 2.31E-05 |       |        |       |          | 0.984 | -1.126 | 0.266 | 2.31E-05 | -?  |
| rs78387553  | 1  | 167397729 |            | C   | G    | 0.979 | -1.034 | 0.244 | 2.31E-05 |       |        |       |          | 0.979 | -1.034 | 0.244 | 2.31E-05 | -?  |
| rs111465347 | 7  | 129574783 | UBE2H      | A   | G    | 0.776 | 0.502  | 0.118 | 2.16E-05 | 0.768 | 0.221  | 0.165 | 1.80E-01 | 0.773 | 0.407  | 0.096 | 2.31E-05 | ++  |
| rs58394833  | 14 | 92988648  | RIN3       | T   | C    | 0.516 | -0.358 | 0.098 | 2.45E-04 | 0.479 | -0.296 | 0.138 | 3.26E-02 | 0.503 | -0.337 | 0.08  | 2.34E-05 | --  |
| rs6970562   | 7  | 68107997  |            | T   | C    | 0.028 | 0.815  | 0.213 | 1.31E-04 | 0.03  | 0.641  | 0.346 | 6.37E-02 | 0.029 | 0.767  | 0.181 | 2.35E-05 | ++  |
| rs116188248 | 2  | 62180673  | COMM<br>D1 | C   | G    | 0.974 | -0.702 | 0.237 | 3.09E-03 | 0.975 | -1.008 | 0.323 | 1.83E-03 | 0.975 | -0.809 | 0.191 | 2.35E-05 | --  |
| rs13403522  | 2  | 725523    |            | A   | G    | 0.019 | 0.587  | 0.284 | 3.84E-02 | 0.013 | 1.868  | 0.417 | 7.58E-06 | 0.017 | 0.992  | 0.234 | 2.35E-05 | ++  |
| rs145650262 | 2  | 729945    |            | A   | C    | 0.981 | -0.587 | 0.284 | 3.84E-02 | 0.987 | -1.868 | 0.417 | 7.58E-06 | 0.983 | -0.992 | 0.234 | 2.35E-05 | --  |
| rs148812682 | 2  | 730184    |            | A   | C    | 0.019 | 0.587  | 0.284 | 3.84E-02 | 0.013 | 1.868  | 0.417 | 7.58E-06 | 0.017 | 0.992  | 0.234 | 2.35E-05 | ++  |
| rs116498271 | 2  | 730651    |            | C   | G    | 0.981 | -0.587 | 0.284 | 3.84E-02 | 0.987 | -1.868 | 0.417 | 7.58E-06 | 0.983 | -0.992 | 0.234 | 2.35E-05 | --  |
| rs76184806  | 12 | 26105260  |            | T   | C    | 0.029 | 0.343  | 0.253 | 1.75E-01 | 0.036 | 1.257  | 0.267 | 2.45E-06 | 0.033 | 0.777  | 0.184 | 2.36E-05 | ++  |
| rs6979056   | 7  | 129580795 | UBE2H      | T   | C    | 0.251 | -0.417 | 0.11  | 1.47E-04 | 0.253 | -0.316 | 0.163 | 5.33E-02 | 0.252 | -0.386 | 0.091 | 2.36E-05 | --  |
| rs574110246 | 8  | 118652008 |            | T   | TA   | 0.989 | -1.319 | 0.312 | 2.37E-05 |       |        |       |          | 0.99  | -1.319 | 0.312 | 2.37E-05 | -?  |
| rs10689256  | 10 | 118996351 |            | CTG | C    | 0.556 | 0.361  | 0.092 | 9.34E-05 | 0.547 | 0.253  | 0.147 | 8.40E-02 | 0.553 | 0.331  | 0.078 | 2.38E-05 | ++  |
| rs12531403  | 7  | 7185752   |            | T   | C    | 0.066 | 0.31   | 0.164 | 5.93E-02 | 0.068 | 0.994  | 0.219 | 5.83E-06 | 0.067 | 0.555  | 0.131 | 2.38E-05 | ++  |
| rs2956035   | 8  | 75086235  |            | A   | G    | 0.342 | -0.359 | 0.097 | 2.02E-04 | 0.376 | -0.301 | 0.148 | 4.19E-02 | 0.352 | -0.342 | 0.081 | 2.39E-05 | --  |
| rs1930474   | 10 | 59768760  |            | A   | G    | 0.386 | -0.326 | 0.099 | 1.02E-03 | 0.395 | -0.378 | 0.142 | 7.56E-03 | 0.389 | -0.343 | 0.081 | 2.41E-05 | --  |
| rs697197    | 12 | 104008584 | STAB2      | A   | T    | 0.803 | -0.307 | 0.102 | 2.64E-03 | 0.829 | -0.519 | 0.164 | 1.56E-03 | 0.81  | -0.366 | 0.087 | 2.41E-05 | --  |
| rs12126234  | 1  | 48575218  |            | A   | C    | 0.976 | -0.818 | 0.224 | 2.68E-04 | 0.962 | -0.625 | 0.285 | 2.85E-02 | 0.97  | -0.744 | 0.176 | 2.46E-05 | --  |
| rs73282482  | 8  | 101815514 |            | A   | G    | 0.029 | 0.96   | 0.228 | 2.46E-05 |       |        |       |          | 0.029 | 0.96   | 0.228 | 2.46E-05 | ++? |
| rs144895577 | 2  | 184345928 |            | A   | G    | 0.989 | -1.303 | 0.309 | 2.46E-05 |       |        |       |          | 0.99  | -1.303 | 0.309 | 2.46E-05 | -?  |
| rs2931380   | 3  | 19936589  | EFHB       | A   | C    | 0.191 | 0.451  | 0.104 | 1.41E-05 | 0.196 | 0.168  | 0.163 | 3.02E-01 | 0.193 | 0.369  | 0.087 | 2.48E-05 | ++  |
| rs62325016  | 4  | 162317333 | FSTL5      | T   | C    | 0.09  | 0.52   | 0.141 | 2.20E-04 | 0.094 | 0.428  | 0.207 | 3.91E-02 | 0.091 | 0.491  | 0.117 | 2.49E-05 | ++  |
| rs12436459  | 14 | 98481337  |            | A   | G    | 0.656 | -0.31  | 0.097 | 1.35E-03 | 0.643 | -0.397 | 0.143 | 5.37E-03 | 0.652 | -0.337 | 0.08  | 2.49E-05 | --  |
| rs114770586 | 1  | 113796385 |            | A   | G    | 0.974 | -0.896 | 0.213 | 2.50E-05 |       |        |       |          | 0.974 | -0.896 | 0.213 | 2.50E-05 | -?  |



|             |    |           |            |      |     |       |        |       |          |       |        |       |          |        |        |          |          |    |
|-------------|----|-----------|------------|------|-----|-------|--------|-------|----------|-------|--------|-------|----------|--------|--------|----------|----------|----|
| rs2468075   | 15 | 45060641  |            | C    | G   | 0.655 | -0.388 | 0.092 | 2.51E-05 |       |        |       | 0.655    | -0.388 | 0.092  | 2.51E-05 | -?       |    |
| rs200851232 | 2  | 213099290 | ERBB4      | T    | TC  | 0.032 | 0.732  | 0.199 | 2.25E-04 | 0.032 | 0.703  | 0.345 | 4.16E-02 | 0.032  | 0.725  | 0.172    | 2.51E-05 | ++ |
| rs139959483 | 2  | 213101005 | ERBB4      | A    | G   | 0.032 | 0.732  | 0.199 | 2.25E-04 | 0.032 | 0.703  | 0.345 | 4.16E-02 | 0.032  | 0.725  | 0.172    | 2.51E-05 | ++ |
| rs4366431   | 10 | 78153552  | C10orf11   | C    | G   | 0.062 | 0.641  | 0.156 | 3.79E-05 | 0.049 | 0.356  | 0.287 | 2.15E-01 | 0.059  | 0.577  | 0.137    | 2.51E-05 | ++ |
| rs10103373  | 8  | 61880764  |            | T    | G   | 0.567 | 0.369  | 0.088 | 2.52E-05 |       |        |       |          | 0.567  | 0.369  | 0.088    | 2.52E-05 | +? |
| rs10090053  | 8  | 97067686  |            | A    | G   | 0.489 | -0.279 | 0.091 | 2.17E-03 | 0.529 | -0.407 | 0.136 | 2.74E-03 | 0.501  | -0.319 | 0.076    | 2.52E-05 | -- |
| rs2956038   | 8  | 75114396  |            | T    | C   | 0.045 | 0.721  | 0.183 | 8.16E-05 | 0.041 | 0.471  | 0.283 | 9.58E-02 | 0.044  | 0.647  | 0.154    | 2.52E-05 | ++ |
| rs78591730  | 13 | 102138784 |            | A    | T   | 0.944 | -0.504 | 0.164 | 2.12E-03 | 0.949 | -0.676 | 0.23  | 3.24E-03 | 0.946  | -0.562 | 0.134    | 2.53E-05 | -- |
| rs9582496   | 13 | 102140921 | ITGBL1     | T    | C   | 0.056 | 0.504  | 0.164 | 2.12E-03 | 0.051 | 0.676  | 0.23  | 3.24E-03 | 0.054  | 0.562  | 0.134    | 2.53E-05 | ++ |
| rs12973186  | 19 | 5102014   | ITGBL1     | A    | G   | 0.018 | 0.954  | 0.226 | 2.53E-05 |       |        |       |          | 0.018  | 0.954  | 0.227    | 2.53E-05 | +? |
| rs10741741  | 11 | 18342081  | KDM4B      | T    | C   | 0.592 | -0.322 | 0.092 | 4.39E-04 | 0.601 | -0.287 | 0.123 | 1.98E-02 | 0.596  | -0.31  | 0.073    | 2.54E-05 | -- |
| rs112168619 | 10 | 5872086   | HPS5       | T    | C   | 0.04  | 0.799  | 0.19  | 2.54E-05 |       |        |       |          | 0.04   | 0.799  | 0.19     | 2.54E-05 | +? |
| rs143440748 | 8  | 8387347   | GD12       | A    | AGT | 0.892 | -0.323 | 0.133 | 1.54E-02 | 0.888 | -0.7   | 0.183 | 1.30E-04 | 0.891  | -0.454 | 0.108    | 2.55E-05 | -- |
| rs143776937 | 6  | 153663509 | AL590867.1 | CAAC | C   | 0.369 | 0.343  | 0.094 | 2.69E-04 | 0.368 | 0.274  | 0.127 | 3.11E-02 | 0.368  | 0.319  | 0.076    | 2.55E-05 | ++ |
| rs527855420 | 12 | 75165820  |            | AA   | G   | 0.786 | 0.489  | 0.126 | 1.00E-04 | 0.796 | 0.317  | 0.176 | 7.22E-02 | 0.79   | 0.431  | 0.102    | 2.55E-05 | ++ |
| rs76101583  | 2  | 62197756  | COMM D1    | A    | G   | 0.974 | -0.696 | 0.237 | 3.33E-03 | 0.975 | -1.008 | 0.323 | 1.83E-03 | 0.974  | -0.805 | 0.191    | 2.56E-05 | -- |
| rs148912611 | 2  | 62200036  | COMM D1    | C    | G   | 0.974 | -0.696 | 0.237 | 3.33E-03 | 0.975 | -1.008 | 0.323 | 1.83E-03 | 0.974  | -0.805 | 0.191    | 2.56E-05 | -- |
| rs534355048 | 2  | 62218047  | COMM D1    | A    | C   | 0.974 | -0.696 | 0.237 | 3.33E-03 | 0.975 | -1.008 | 0.323 | 1.83E-03 | 0.974  | -0.805 | 0.191    | 2.56E-05 | -- |
| rs147361733 | 2  | 62230138  | COMM D1    | T    | C   | 0.026 | 0.696  | 0.237 | 3.33E-03 | 0.025 | 1.008  | 0.323 | 1.83E-03 | 0.026  | 0.805  | 0.191    | 2.56E-05 | ++ |
| rs12444844  | 16 | 27990399  | GSG1L      | T    | G   | 0.174 | 0.339  | 0.117 | 3.69E-03 | 0.162 | 0.514  | 0.162 | 1.52E-03 | 0.17   | 0.399  | 0.095    | 2.56E-05 | ++ |
| rs17555093  | 7  | 149015327 |            | C    | G   | 0.949 | -0.641 | 0.173 | 2.16E-04 | 0.957 | -0.545 | 0.269 | 4.28E-02 | 0.951  | -0.613 | 0.146    | 2.59E-05 | -- |
| rs7726317   | 5  | 117921244 |            | A    | G   | 0.05  | 0.308  | 0.191 | 1.06E-01 | 0.066 | 0.902  | 0.204 | 9.53E-06 | 0.058  | 0.586  | 0.139    | 2.60E-05 | ++ |
| rs34089610  | 9  | 97443765  |            | A    | C   | 0.025 | 0.634  | 0.243 | 9.12E-03 | 0.036 | 0.938  | 0.276 | 6.68E-04 | 0.029  | 0.767  | 0.182    | 2.61E-05 | ++ |
| rs7243003   | 18 | 56707448  |            | T    | C   | 0.401 | 0.381  | 0.091 | 2.61E-05 |       |        |       |          | 0.401  | 0.381  | 0.091    | 2.61E-05 | +? |
| rs12195341  | 6  | 51749131  |            | C    | G   | 0.014 | 1.216  | 0.289 | 2.61E-05 |       |        |       |          | 0.013  | 1.216  | 0.289    | 2.61E-05 | +? |
| rs12206293  | 6  | 51751389  | PKHD1      | T    | C   | 0.986 | -1.216 | 0.289 | 2.61E-05 |       |        |       |          | 0.987  | -1.216 | 0.289    | 2.61E-05 | -? |
| rs537927647 | 7  | 51789720  | PKHD1      | A    | T   | 0.966 | -0.847 | 0.202 | 2.62E-05 |       |        |       |          | 0.966  | -0.847 | 0.202    | 2.62E-05 | -? |
| rs571358545 | 7  | 120880850 | CPED1      | C    | G   | 0.01  | 1.306  | 0.311 | 2.63E-05 |       |        |       |          | 0.01   | 1.306  | 0.311    | 2.63E-05 | +? |

|             |    |           |                                    |   |     |       |        |       |          |       |        |       |          |        |        |          |          |    |
|-------------|----|-----------|------------------------------------|---|-----|-------|--------|-------|----------|-------|--------|-------|----------|--------|--------|----------|----------|----|
| rs185438958 | 7  | 55538647  | VOPP1                              | T | C   | 0.971 | -0.531 | 0.249 | 3.32E-02 | 0.97  | -1.13  | 0.286 | 7.84E-05 | 0.971  | -0.789 | 0.188    | 2.66E-05 | -- |
| rs73188570  | 8  | 8380281   |                                    | T | C   | 0.951 | -0.51  | 0.176 | 3.75E-03 | 0.949 | -0.744 | 0.237 | 1.68E-03 | 0.95   | -0.593 | 0.141    | 2.67E-05 | -- |
| rs41306045  | 6  | 117083172 | FAM16<br>2B<br>FAM16<br>2B         | T | C   | 0.011 | 0.977  | 0.33  | 3.10E-03 | 0.02  | 1.082  | 0.362 | 2.82E-03 | 0.015  | 1.025  | 0.244    | 2.70E-05 | ++ |
| rs62424435  | 6  | 117084242 |                                    | T | C   | 0.011 | 0.977  | 0.33  | 3.10E-03 | 0.02  | 1.082  | 0.362 | 2.82E-03 | 0.015  | 1.025  | 0.244    | 2.70E-05 | ++ |
| rs116194294 | 1  | 201920542 |                                    | T | C   | 0.981 | -1.01  | 0.241 | 2.72E-05 |       |        |       | 0.981    | -1.01  | 0.241  | 2.72E-05 | -?       |    |
| rs10878013  | 12 | 63636405  |                                    | T | C   | 0.808 | -0.356 | 0.105 | 6.95E-04 | 0.799 | -0.38  | 0.154 | 1.34E-02 | 0.805  | -0.363 | 0.087    | 2.73E-05 | -- |
| rs1699041   | 21 | 46011397  | TSPEA<br>R<br>RP11-<br>302M6.<br>4 | A | G   | 0.904 | -0.566 | 0.135 | 2.73E-05 |       |        |       | 0.904    | -0.566 | 0.135  | 2.73E-05 | -?       |    |
| rs112225300 | 1  | 90262687  |                                    | A | T   | 0.926 | 1.048  | 0.25  | 2.73E-05 |       |        |       | 0.926    | 1.048  | 0.25   | 2.73E-05 | +?       |    |
| rs1930470   | 10 | 59767845  |                                    | A | G   | 0.387 | -0.319 | 0.099 | 1.28E-03 | 0.396 | -0.383 | 0.141 | 6.75E-03 | 0.39   | -0.34  | 0.081    | 2.76E-05 | -- |
| rs1930472   | 10 | 59768050  |                                    | A | G   | 0.613 | 0.319  | 0.099 | 1.28E-03 | 0.604 | 0.383  | 0.141 | 6.75E-03 | 0.61   | 0.34   | 0.081    | 2.76E-05 | ++ |
| rs34646923  | 3  | 9550925   | LHFPL4<br>FBN3                     | A | AC  | 0.259 | 0.393  | 0.094 | 2.77E-05 |       |        |       | 0.259    | 0.393  | 0.094  | 2.77E-05 | +?       |    |
| rs35347475  | 19 | 8182938   |                                    | T | TAC | 0.126 | 0.452  | 0.122 | 2.04E-04 | 0.14  | 0.346  | 0.173 | 4.50E-02 | 0.131  | 0.417  | 0.099    | 2.77E-05 | ++ |
| rs4724952   | 7  | 7189717   |                                    | A | C   | 0.932 | -0.3   | 0.163 | 6.50E-02 | 0.929 | -0.968 | 0.215 | 6.66E-06 | 0.931  | -0.544 | 0.13     | 2.78E-05 | -- |
| rs142534252 | 3  | 142612482 |                                    | A | G   | 0.091 | 0.546  | 0.133 | 3.81E-05 | 0.088 | 0.281  | 0.217 | 1.94E-01 | 0.09   | 0.474  | 0.113    | 2.79E-05 | ++ |
| rs62424438  | 6  | 117092777 |                                    | A | G   | 0.011 | 1.001  | 0.332 | 2.55E-03 | 0.018 | 1.099  | 0.377 | 3.58E-03 | 0.014  | 1.044  | 0.249    | 2.80E-05 | ++ |
| rs2929384   | 3  | 19932499  | EFHB                               | A | G   | 0.808 | -0.449 | 0.104 | 1.49E-05 | 0.803 | -0.163 | 0.162 | 3.15E-01 | 0.807  | -0.366 | 0.087    | 2.81E-05 | -- |
| rs115540417 | 6  | 21453879  |                                    | T | C   | 0.097 | 0.551  | 0.132 | 2.81E-05 |       |        |       | 0.098    | 0.551  | 0.132  | 2.81E-05 | +?       |    |
| rs75191634  | 11 | 120528226 | GRIK4                              | A | G   | 0.963 | -0.829 | 0.198 | 2.82E-05 |       |        |       | 0.963    | -0.829 | 0.198  | 2.82E-05 | -?       |    |
| rs4081624   | 10 | 118996115 |                                    | A | C   | 0.505 | -0.362 | 0.09  | 6.09E-05 | 0.537 | -0.216 | 0.146 | 1.40E-01 | 0.513  | -0.321 | 0.077    | 2.83E-05 | -- |
| rs16831521  | 3  | 180076400 |                                    | T | C   | 0.923 | -0.595 | 0.143 | 3.28E-05 | 0.931 | -0.289 | 0.233 | 2.16E-01 | 0.925  | -0.511 | 0.122    | 2.83E-05 | -- |
| rs61247576  | 9  | 97429925  |                                    | A | C   | 0.974 | -0.615 | 0.241 | 1.05E-02 | 0.965 | -0.952 | 0.277 | 5.87E-04 | 0.97   | -0.76  | 0.182    | 2.84E-05 | -- |
| rs62325025  | 4  | 162332566 | FSTL5<br>PRDM1<br>5                | T | C   | 0.907 | -0.53  | 0.138 | 1.26E-04 | 0.9   | -0.369 | 0.205 | 7.16E-02 | 0.905  | -0.48  | 0.115    | 2.84E-05 | -- |
| rs76912990  | 21 | 43240688  |                                    | T | C   | 0.014 | 1.166  | 0.279 | 2.85E-05 |       |        |       | 0.014    | 1.166  | 0.279  | 2.85E-05 | +?       |    |
| rs369736478 | 7  | 125405126 |                                    | A | C   | 0.945 | -0.701 | 0.167 | 2.87E-05 |       |        |       | 0.945    | -0.701 | 0.168  | 2.87E-05 | -?       |    |
| rs77442209  | 5  | 10451034  | ROPN1<br>L                         | T | C   | 0.058 | 0.688  | 0.164 | 2.89E-05 |       |        |       | 0.058    | 0.688  | 0.165  | 2.89E-05 | +?       |    |
| rs4788017   | 16 | 27976829  | GSG1L                              | A | G   | 0.812 | -0.397 | 0.109 | 2.56E-04 | 0.805 | -0.306 | 0.147 | 3.68E-02 | 0.81   | -0.365 | 0.087    | 2.90E-05 | -- |
| rs73037608  | 3  | 176686874 |                                    | A | G   | 0.247 | 0.363  | 0.099 | 2.58E-04 | 0.229 | 0.303  | 0.147 | 3.95E-02 | 0.241  | 0.344  | 0.082    | 2.90E-05 | ++ |

|             |    |           |              |          |                                      |       |        |       |          |       |        |       |          |       |        |          |          |    |
|-------------|----|-----------|--------------|----------|--------------------------------------|-------|--------|-------|----------|-------|--------|-------|----------|-------|--------|----------|----------|----|
| rs115431271 | 18 | 55402395  | ATP8B1       | A        | G                                    | 0.014 | 1.226  | 0.293 | 2.91E-05 |       |        |       | 0.013    | 1.226 | 0.293  | 2.91E-05 | +?       |    |
| rs9476981   | 6  | 15916893  |              | T        | C                                    | 0.962 | -0.798 | 0.196 | 4.53E-05 | 0.964 | -0.422 | 0.305 | 1.67E-01 | 0.962 | -0.689 | 0.165    | 2.92E-05 | -- |
| rs34297290  | 7  | 129585784 | UBE2H        | T        | C                                    | 0.678 | 0.405  | 0.102 | 6.59E-05 | 0.677 | 0.232  | 0.147 | 1.15E-01 | 0.677 | 0.35   | 0.084    | 2.93E-05 | ++ |
| rs9792563   | 9  | 1322280   |              | T        | G                                    | 0.619 | 0.404  | 0.097 | 2.92E-05 | 0.613 | 0.183  | 0.143 | 2.00E-01 | 0.617 | 0.335  | 0.08     | 2.95E-05 | ++ |
| rs9794407   | 10 | 1349262   | ADARB2       | A        | C                                    | 0.848 | -0.496 | 0.119 | 2.96E-05 |       |        |       |          | 0.848 | -0.496 | 0.119    | 2.96E-05 | -? |
| rs9505640   | 6  | 9120953   |              | A        | T                                    | 0.972 | -0.916 | 0.219 | 2.96E-05 |       |        |       |          | 0.972 | -0.916 | 0.219    | 2.96E-05 | -? |
| rs149078994 | 4  | 158245818 | GRIA2        | A        | G                                    | 0.982 | -1.04  | 0.243 | 1.80E-05 | 0.983 | -0.358 | 0.518 | 4.90E-01 | 0.983 | -0.917 | 0.22     | 2.97E-05 | -- |
| rs7556919   | 2  | 119194761 |              | T        | C                                    | 0.29  | 0.343  | 0.094 | 2.41E-04 | 0.284 | 0.289  | 0.143 | 4.41E-02 | 0.288 | 0.327  | 0.078    | 2.98E-05 | ++ |
| rs1370512   | 2  | 119194992 |              | T        | C                                    | 0.29  | 0.343  | 0.094 | 2.41E-04 | 0.284 | 0.289  | 0.143 | 4.41E-02 | 0.288 | 0.327  | 0.078    | 2.98E-05 | ++ |
| rs566523351 | 1  | 90261018  | RP11-302M6.4 | T        | TTTA                                 | 0.927 | 1.043  | 0.25  | 2.99E-05 |       |        |       |          | 0.926 | 1.043  | 0.25     | 2.99E-05 | +? |
| rs111272652 | 17 | 1023802   | ABR          | T        | C                                    | 0.04  | 0.794  | 0.19  | 2.99E-05 |       |        |       |          | 0.04  | 0.794  | 0.19     | 2.99E-05 | +? |
| rs139760259 | 3  | 87986940  |              | C        | G                                    | 0.016 | 0.779  | 0.274 | 4.52E-03 | 0.019 | 1.175  | 0.37  | 1.48E-03 | 0.018 | 0.919  | 0.22     | 2.99E-05 | ++ |
| rs12622630  | 2  | 232152297 | ARMC9        | A        | G                                    | 0.803 | -0.352 | 0.109 | 1.29E-03 | 0.805 | -0.408 | 0.153 | 7.53E-03 | 0.804 | -0.371 | 0.089    | 3.01E-05 | -- |
| rs575248632 | 4  | 83815426  | SEC31A       | CTTTGTGT | C                                    | 0.988 | -1.244 | 0.298 | 3.02E-05 |       |        |       |          | 0.988 | -1.244 | 0.298    | 3.02E-05 | -? |
| rs56289902  | 7  | 7191986   |              | T        | C                                    | 0.069 | 0.297  | 0.164 | 7.00E-02 | 0.071 | 0.968  | 0.215 | 6.66E-06 | 0.07  | 0.543  | 0.13     | 3.04E-05 | ++ |
| rs112308087 | 5  | 133401821 |              | A        | G                                    | 0.026 | 0.837  | 0.221 | 1.48E-04 | 0.037 | 0.552  | 0.291 | 5.77E-02 | 0.03  | 0.733  | 0.176    | 3.05E-05 | ++ |
| rs35633351  | 2  | 174709261 |              | T        | C                                    | 0.069 | 0.64   | 0.153 | 3.05E-05 |       |        |       |          | 0.069 | 0.64   | 0.153    | 3.05E-05 | +? |
| rs10464619  | 7  | 77969785  | MAGI2        | T        | C                                    | 0.012 | 0.885  | 0.325 | 6.45E-03 | 0.015 | 1.277  | 0.393 | 1.16E-03 | 0.013 | 1.044  | 0.25     | 3.05E-05 | ++ |
| rs117499799 | 7  | 77970782  | MAGI2        | T        | C                                    | 0.012 | 0.885  | 0.325 | 6.45E-03 | 0.015 | 1.277  | 0.393 | 1.16E-03 | 0.013 | 1.044  | 0.25     | 3.05E-05 | ++ |
| rs117870566 | 7  | 77970907  | MAGI2        | T        | C                                    | 0.012 | 0.885  | 0.325 | 6.45E-03 | 0.015 | 1.277  | 0.393 | 1.16E-03 | 0.013 | 1.044  | 0.25     | 3.05E-05 | ++ |
| rs200319268 | 7  | 77970943  | MAGI2        | A        | AC                                   | 0.012 | 0.885  | 0.325 | 6.45E-03 | 0.015 | 1.277  | 0.393 | 1.16E-03 | 0.013 | 1.044  | 0.25     | 3.05E-05 | ++ |
| rs190353615 | 2  | 722192    |              | A        | G                                    | 0.019 | 0.566  | 0.283 | 4.57E-02 | 0.013 | 1.868  | 0.417 | 7.58E-06 | 0.017 | 0.976  | 0.234    | 3.09E-05 | ++ |
| rs77334734  | 21 | 42824293  | MX1          | C        | G                                    | 0.985 | -1.082 | 0.269 | 5.91E-05 | 0.984 | -0.631 | 0.449 | 1.61E-01 | 0.985 | -0.963 | 0.231    | 3.10E-05 | -- |
| rs73037611  | 3  | 176687914 |              | T        | C                                    | 0.247 | 0.362  | 0.099 | 2.77E-04 | 0.229 | 0.303  | 0.147 | 3.95E-02 | 0.242 | 0.343  | 0.082    | 3.10E-05 | ++ |
| rs147688762 | 15 | 41790896  | ITPKA        | A        | G                                    |       |        |       |          | 0.011 | 1.855  | 0.445 | 3.12E-05 | 0.011 | 1.855  | 0.445    | 3.12E-05 | ?+ |
| rs72308925  | 15 | 41794465  | ITPKA        | G        | GCTC<br>CCGC<br>CCCG<br>CCTG<br>CCCC | 0.011 | 1.855  | 0.445 | 3.12E-05 | 0.011 | 1.855  | 0.445 | 3.12E-05 | 0.011 | 1.855  | 0.445    | 3.12E-05 | ?+ |

|             |    |           |              |   |                                   |       |        |       |          |       |        |       |          |       |        |       |          |    |
|-------------|----|-----------|--------------|---|-----------------------------------|-------|--------|-------|----------|-------|--------|-------|----------|-------|--------|-------|----------|----|
| rs35089028  | 11 | 77164561  | PAK1         | T | TCCG<br>CCCT<br>TA                | 0.189 | -0.423 | 0.126 | 7.82E-04 | 0.207 | -0.423 | 0.172 | 1.38E-02 | 0.195 | -0.423 | 0.102 | 3.12E-05 | -- |
| rs1930475   | 10 | 59768808  |              | A | G                                 | 0.531 | 0.339  | 0.097 | 5.01E-04 | 0.53  | 0.316  | 0.138 | 2.21E-02 | 0.53  | 0.331  | 0.08  | 3.13E-05 | ++ |
| rs111777972 | 9  | 97446540  |              | A | G                                 | 0.025 | 0.634  | 0.243 | 9.12E-03 | 0.036 | 0.917  | 0.275 | 8.48E-04 | 0.03  | 0.758  | 0.182 | 3.13E-05 | ++ |
| rs576418706 | 4  | 76369184  |              | T | C                                 | 0.077 | 0.607  | 0.146 | 3.14E-05 |       |        |       |          | 0.077 | 0.607  | 0.146 | 3.14E-05 | +  |
| rs76923085  | 17 | 18897732  | SLC5A1<br>0  | A | G                                 | 0.065 | 0.652  | 0.157 | 3.14E-05 |       |        |       |          | 0.065 | 0.652  | 0.157 | 3.14E-05 | +  |
| rs6575264   | 14 | 92985113  | RIN3         | A | G                                 | 0.467 | 0.381  | 0.099 | 1.25E-04 | 0.496 | 0.252  | 0.142 | 7.54E-02 | 0.476 | 0.339  | 0.081 | 3.14E-05 | ++ |
| rs13075932  | 3  | 88327613  |              | T | C                                 | 0.978 | -1.021 | 0.245 | 3.17E-05 |       |        |       |          | 0.979 | -1.021 | 0.245 | 3.17E-05 | -? |
| rs142128766 | 10 | 128224870 | C10orf9<br>0 | A | C                                 | 0.978 | -0.689 | 0.263 | 8.76E-03 | 0.982 | -1.375 | 0.388 | 3.92E-04 | 0.979 | -0.905 | 0.218 | 3.19E-05 | -- |
| rs12983105  | 19 | 46696423  |              | A | T                                 | 0.016 | 1.102  | 0.265 | 3.20E-05 |       |        |       |          | 0.017 | 1.102  | 0.265 | 3.20E-05 | +  |
| rs79508892  | 1  | 113792932 |              | C | G                                 | 0.027 | 0.883  | 0.212 | 3.20E-05 |       |        |       |          | 0.026 | 0.883  | 0.212 | 3.20E-05 | +  |
| rs368417617 | 14 | 52061024  | FRMD6        | T | TTTT<br>A                         | 0.222 | 0.363  | 0.105 | 5.33E-04 | 0.256 | 0.326  | 0.141 | 2.08E-02 | 0.234 | 0.35   | 0.084 | 3.20E-05 | ++ |
| rs114937444 | 4  | 174448570 | HAND2        | A | T                                 | 0.013 | 1.242  | 0.299 | 3.21E-05 |       |        |       |          | 0.013 | 1.242  | 0.299 | 3.21E-05 | +  |
| rs201644806 | 14 | 98480386  |              | T | TCTC<br>CCTC<br>CCTC<br>CTTG<br>C | 0.33  | 0.299  | 0.098 | 2.21E-03 | 0.349 | 0.41   | 0.142 | 3.88E-03 | 0.337 | 0.334  | 0.08  | 3.21E-05 | ++ |
| rs141247511 | 7  | 70670196  | WBSCR<br>17  | A | G                                 | 0.022 | 0.92   | 0.246 | 1.81E-04 | 0.019 | 0.748  | 0.406 | 6.57E-02 | 0.021 | 0.874  | 0.21  | 3.23E-05 | ++ |
| rs73989465  | 2  | 215244523 | SPAG16       | A | C                                 | 0.843 | -0.455 | 0.11  | 3.27E-05 |       |        |       |          | 0.843 | -0.455 | 0.11  | 3.27E-05 | -? |
| rs80011419  | 6  | 117093451 |              | A | C                                 | 0.011 | 0.981  | 0.33  | 2.97E-03 | 0.018 | 1.099  | 0.377 | 3.58E-03 | 0.014 | 1.032  | 0.248 | 3.27E-05 | ++ |
| rs62424440  | 6  | 117095609 |              | T | C                                 | 0.989 | -0.981 | 0.33  | 2.97E-03 | 0.982 | -1.099 | 0.377 | 3.58E-03 | 0.986 | -1.032 | 0.248 | 3.27E-05 | -- |
| rs62424441  | 6  | 117095819 |              | A | G                                 | 0.011 | 0.981  | 0.33  | 2.97E-03 | 0.018 | 1.099  | 0.377 | 3.58E-03 | 0.014 | 1.032  | 0.248 | 3.27E-05 | ++ |
| rs543962900 | 7  | 70632681  | WBSCR<br>17  | A | T                                 | 0.988 | -1.287 | 0.31  | 3.27E-05 |       |        |       |          | 0.988 | -1.287 | 0.31  | 3.27E-05 | -? |
| rs140428124 | 21 | 21991033  |              | A | G                                 | 0.974 | -0.932 | 0.224 | 3.27E-05 |       |        |       |          | 0.974 | -0.932 | 0.224 | 3.27E-05 | -? |
| rs10843228  | 12 | 28797052  |              | A | C                                 | 0.217 | 0.226  | 0.104 | 3.02E-02 | 0.248 | 0.589  | 0.144 | 4.32E-05 | 0.228 | 0.351  | 0.084 | 3.28E-05 | ++ |
| rs17147824  | 7  | 77966192  | MAGI2        | A | G                                 | 0.988 | -0.885 | 0.325 | 6.45E-03 | 0.985 | -1.245 | 0.387 | 1.31E-03 | 0.987 | -1.033 | 0.249 | 3.30E-05 | -- |
| rs199886226 | 7  | 77968691  | MAGI2        | G | GA                                | 0.012 | 0.885  | 0.325 | 6.45E-03 | 0.015 | 1.245  | 0.387 | 1.31E-03 | 0.013 | 1.033  | 0.249 | 3.30E-05 | ++ |
| rs528630024 | 7  | 77968693  | MAGI2        | A | G                                 | 0.988 | -0.885 | 0.325 | 6.45E-03 | 0.985 | -1.245 | 0.387 | 1.31E-03 | 0.987 | -1.033 | 0.249 | 3.30E-05 | -- |
| rs17150550  | 7  | 77969112  | MAGI2        | T | G                                 | 0.988 | -0.885 | 0.325 | 6.45E-03 | 0.985 | -1.245 | 0.387 | 1.31E-03 | 0.987 | -1.033 | 0.249 | 3.30E-05 | -- |

|             |    |           |            |   |    |       |        |       |          |       |        |       |          |        |        |          |          |    |
|-------------|----|-----------|------------|---|----|-------|--------|-------|----------|-------|--------|-------|----------|--------|--------|----------|----------|----|
| rs184099020 | 16 | 19078547  |            | A | T  | 0.014 | 1.235  | 0.298 | 3.30E-05 |       |        |       | 0.013    | 1.235  | 0.297  | 3.30E-05 | ++?      |    |
| rs4408825   | 3  | 65581480  | MAG11      | T | C  | 0.815 | -0.368 | 0.105 | 4.46E-04 | 0.829 | -0.372 | 0.168 | 2.69E-02 | 0.819  | -0.369 | 0.089    | 3.32E-05 | -- |
| rs796644157 | 7  | 149014280 |            | A | AT | 0.078 | 0.55   | 0.146 | 1.61E-04 | 0.059 | 0.451  | 0.257 | 7.88E-02 | 0.073  | 0.526  | 0.127    | 3.33E-05 | ++ |
| rs557930994 | 3  | 87982438  |            | T | C  | 0.987 | -0.951 | 0.298 | 1.40E-03 | 0.988 | -1.233 | 0.457 | 6.99E-03 | 0.988  | -1.035 | 0.249    | 3.34E-05 | -- |
| rs576495351 | 3  | 87982468  |            | A | G  | 0.987 | -0.951 | 0.298 | 1.40E-03 | 0.988 | -1.233 | 0.457 | 6.99E-03 | 0.988  | -1.035 | 0.249    | 3.34E-05 | -- |
| rs555317536 | 3  | 87982510  |            | T | C  | 0.987 | -0.951 | 0.298 | 1.40E-03 | 0.988 | -1.233 | 0.457 | 6.99E-03 | 0.988  | -1.035 | 0.249    | 3.34E-05 | -- |
| rs78972026  | 3  | 71955823  |            | C | G  | 0.972 | -0.844 | 0.221 | 1.35E-04 | 0.978 | -0.62  | 0.363 | 8.77E-02 | 0.974  | -0.784 | 0.189    | 3.35E-05 | -- |
| rs116497000 | 8  | 3611709   | CSMD1      | C | G  | 0.98  | -1.046 | 0.252 | 3.36E-05 |       |        |       | 0.98     | -1.046 | 0.252  | 3.36E-05 | -?       |    |
| rs149936787 | 1  | 27703088  |            | A | T  | 0.987 | -1.206 | 0.291 | 3.37E-05 |       |        |       | 0.987    | -1.206 | 0.291  | 3.37E-05 | -?       |    |
| rs67658320  | 2  | 209703230 | PTH2R      | T | C  | 0.139 | 0.491  | 0.119 | 3.41E-05 |       |        |       | 0.139    | 0.491  | 0.119  | 3.41E-05 | ++?      |    |
| rs7789336   | 7  | 129583129 | UBE2H      | T | C  | 0.251 | -0.416 | 0.11  | 1.52E-04 | 0.253 | -0.291 | 0.162 | 7.22E-02 | 0.251  | -0.377 | 0.091    | 3.43E-05 | -- |
| rs3110675   | 15 | 45065642  |            | A | T  | 0.344 | 0.379  | 0.092 | 3.43E-05 |       |        |       | 0.344    | 0.379  | 0.091  | 3.43E-05 | ++?      |    |
| rs1563059   | 2  | 181414808 |            | T | G  | 0.171 | 0.346  | 0.112 | 2.03E-03 | 0.173 | 0.462  | 0.163 | 4.72E-03 | 0.172  | 0.383  | 0.092    | 3.43E-05 | ++ |
| rs143345370 | 15 | 43896940  | CKMT1<br>B | C | G  | 0.942 | -0.687 | 0.157 | 1.22E-05 | 0.952 | -0.175 | 0.297 | 5.55E-01 | 0.944  | -0.575 | 0.139    | 3.44E-05 | -- |
| rs146980261 | 3  | 87942366  |            | A | G  | 0.017 | 0.766  | 0.274 | 5.11E-03 | 0.019 | 1.175  | 0.37  | 1.48E-03 | 0.018  | 0.911  | 0.22     | 3.45E-05 | ++ |
| rs143685564 | 3  | 87943504  |            | A | T  | 0.017 | 0.766  | 0.274 | 5.11E-03 | 0.019 | 1.175  | 0.37  | 1.48E-03 | 0.018  | 0.911  | 0.22     | 3.45E-05 | ++ |
| rs7175002   | 15 | 26447659  |            | A | G  | 0.875 | -0.497 | 0.12  | 3.46E-05 |       |        |       | 0.875    | -0.497 | 0.12   | 3.46E-05 | -?       |    |
| rs13223718  | 7  | 149017184 |            | A | T  | 0.068 | 0.597  | 0.152 | 8.14E-05 | 0.058 | 0.386  | 0.267 | 1.48E-01 | 0.065  | 0.546  | 0.132    | 3.47E-05 | ++ |
| rs79216413  | 19 | 46681687  |            | T | G  | 0.016 | 1.098  | 0.265 | 3.47E-05 |       |        |       | 0.017    | 1.098  | 0.265  | 3.47E-05 | ++?      |    |
| rs534051742 | 2  | 62207710  | COMM<br>D1 | T | C  | 0.026 | 0.681  | 0.237 | 4.05E-03 | 0.025 | 0.993  | 0.322 | 2.07E-03 | 0.026  | 0.79   | 0.191    | 3.48E-05 | ++ |
| rs4903510   | 14 | 77355410  |            | A | G  | 0.051 | 0.696  | 0.168 | 3.48E-05 |       |        |       | 0.051    | 0.696  | 0.168  | 3.48E-05 | ++?      |    |
| rs62193731  | 2  | 232006786 | PSMD1      | A | G  | 0.145 | 0.36   | 0.112 | 1.35E-03 | 0.144 | 0.449  | 0.169 | 7.90E-03 | 0.145  | 0.387  | 0.094    | 3.49E-05 | ++ |
| rs9549403   | 13 | 114054609 |            | T | C  | 0.596 | -0.358 | 0.087 | 3.50E-05 |       |        |       | 0.596    | -0.358 | 0.087  | 3.50E-05 | -?       |    |
| rs7277567   | 21 | 27995962  |            | A | T  | 0.959 | -0.737 | 0.178 | 3.51E-05 |       |        |       | 0.959    | -0.737 | 0.178  | 3.51E-05 | -?       |    |
| rs139495342 | 4  | 83738699  |            | T | C  | 0.984 | -1.118 | 0.27  | 3.51E-05 |       |        |       | 0.984    | -1.118 | 0.27   | 3.51E-05 | -?       |    |
| rs6752436   | 2  | 181413253 |            | A | G  | 0.171 | 0.346  | 0.112 | 2.03E-03 | 0.173 | 0.46   | 0.163 | 4.87E-03 | 0.172  | 0.383  | 0.092    | 3.52E-05 | ++ |
| rs140304980 | 7  | 29758915  |            | A | C  | 0.976 | -0.888 | 0.224 | 7.25E-05 | 0.982 | -0.55  | 0.397 | 1.66E-01 | 0.977  | -0.806 | 0.195    | 3.52E-05 | -- |
| rs115557754 | 4  | 158130317 | GRIA2      | C | G  | 0.984 | -1.08  | 0.253 | 1.94E-05 | 0.986 | -0.323 | 0.576 | 5.75E-01 | 0.985  | -0.958 | 0.232    | 3.53E-05 | -- |

|             |    |           |             |    |       |       |        |       |          |       |        |         |          |       |        |       |          |    |
|-------------|----|-----------|-------------|----|-------|-------|--------|-------|----------|-------|--------|---------|----------|-------|--------|-------|----------|----|
| rs9582495   | 13 | 102136512 |             | C  | G     | 0.944 | -0.489 | 0.164 | 2.88E-03 | 0.949 | -0.676 | 0.23    | 3.24E-03 | 0.945 | -0.552 | 0.134 | 3.53E-05 | -- |
| rs11804107  | 1  | 113472147 | ITGBL1      | A  | C     | 0.051 | 0.502  | 0.178 | 4.74E-03 | 0.053 | 0.789  | 0.25    | 1.56E-03 | 0.051 | 0.599  | 0.145 | 3.56E-05 | ++ |
| rs58920012  | 1  | 113487149 | SLC16A1     | T  | C     | 0.949 | -0.502 | 0.178 | 4.74E-03 | 0.947 | -0.789 | 0.25    | 1.56E-03 | 0.949 | -0.599 | 0.145 | 3.56E-05 | -- |
| rs11801876  | 1  | 113489045 | SLC16A1     | A  | T     | 0.949 | -0.502 | 0.178 | 4.74E-03 | 0.947 | -0.789 | 0.25    | 1.56E-03 | 0.949 | -0.599 | 0.145 | 3.56E-05 | -- |
| rs191541620 | 1  | 110494121 |             | T  | C     | 0.981 | -1.045 | 0.253 | 3.58E-05 | 0.986 | 14.744 | 426.113 | 9.72E-01 | 0.981 | -1.045 | 0.253 | 3.58E-05 | -+ |
| rs5773988   | 1  | 48565411  |             | A  | AT    | 0.026 | 0.771  | 0.214 | 3.22E-04 | 0.039 | 0.595  | 0.284   | 3.61E-02 | 0.031 | 0.707  | 0.171 | 3.58E-05 | ++ |
| rs17009775  | 2  | 30787943  | LCLAT1      | A  | T     | 0.011 | 1.047  | 0.345 | 2.39E-03 | 0.012 | 1.257  | 0.445   | 4.70E-03 | 0.011 | 1.126  | 0.273 | 3.59E-05 | ++ |
| rs183071534 | 2  | 30797090  | LCLAT1      | A  | T     | 0.989 | -1.047 | 0.345 | 2.39E-03 | 0.988 | -1.257 | 0.445   | 4.70E-03 | 0.989 | -1.126 | 0.273 | 3.59E-05 | -- |
| rs17164001  | 7  | 7192868   |             | C  | G     | 0.931 | -0.289 | 0.164 | 7.80E-02 | 0.929 | -0.968 | 0.215   | 6.66E-06 | 0.93  | -0.538 | 0.13  | 3.60E-05 | -- |
| rs66506667  | 5  | 173631697 |             | CG | C     | 0.398 | 0.333  | 0.09  | 2.28E-04 | 0.408 | 0.259  | 0.135   | 5.48E-02 | 0.401 | 0.31   | 0.075 | 3.61E-05 | ++ |
| rs6575640   | 14 | 98476907  | NSG2        | T  | C     | 0.336 | 0.293  | 0.097 | 2.62E-03 | 0.348 | 0.417  | 0.143   | 3.53E-03 | 0.34  | 0.332  | 0.081 | 3.63E-05 | ++ |
| rs7735143   | 5  | 92726723  |             | C  | G     | 0.014 | 1.228  | 0.297 | 3.63E-05 |       |        |         |          | 0.013 | 1.228  | 0.297 | 3.63E-05 | +  |
| rs139194449 | 5  | 92734101  |             | A  | G     | 0.014 | 1.228  | 0.297 | 3.63E-05 |       |        |         |          | 0.013 | 1.228  | 0.297 | 3.63E-05 | +  |
| rs141029616 | 5  | 92735158  |             | A  | T     | 0.014 | 1.228  | 0.297 | 3.63E-05 |       |        |         |          | 0.013 | 1.228  | 0.297 | 3.63E-05 | +  |
| rs143652265 | 5  | 92735752  |             | A  | T     | 0.986 | -1.228 | 0.297 | 3.63E-05 |       |        |         |          | 0.987 | -1.228 | 0.297 | 3.63E-05 | -? |
| rs138449968 | 5  | 92736496  |             | A  | C     | 0.986 | -1.228 | 0.297 | 3.63E-05 |       |        |         |          | 0.987 | -1.228 | 0.297 | 3.63E-05 | -? |
| rs4498940   | 10 | 59802063  |             | C  | G     | 0.375 | -0.298 | 0.098 | 2.41E-03 | 0.385 | -0.406 | 0.142   | 4.12E-03 | 0.378 | -0.334 | 0.081 | 3.65E-05 | -- |
| rs1930495   | 10 | 59802660  |             | A  | G     | 0.625 | 0.298  | 0.098 | 2.41E-03 | 0.615 | 0.406  | 0.142   | 4.12E-03 | 0.622 | 0.334  | 0.081 | 3.65E-05 | ++ |
| rs78570362  | 4  | 113051577 |             | T  | C     | 0.93  | -0.369 | 0.156 | 1.76E-02 | 0.943 | -0.872 | 0.227   | 1.24E-04 | 0.934 | -0.53  | 0.128 | 3.66E-05 | -- |
| rs147913187 | 4  | 113052990 |             | T  | C     | 0.07  | 0.369  | 0.156 | 1.76E-02 | 0.057 | 0.872  | 0.227   | 1.24E-04 | 0.066 | 0.53   | 0.128 | 3.66E-05 | ++ |
| rs149045446 | 3  | 177400901 |             | T  | TTCTC | 0.035 | 0.419  | 0.22  | 5.71E-02 | 0.041 | 1.058  | 0.257   | 3.76E-05 | 0.037 | 0.69   | 0.167 | 3.66E-05 | ++ |
| rs405177    | 19 | 30400632  |             | T  | C     | 0.012 | 1.217  | 0.295 | 3.67E-05 |       |        |         |          | 0.012 | 1.217  | 0.295 | 3.67E-05 | +  |
| rs420160    | 19 | 30402013  |             | T  | C     | 0.012 | 1.217  | 0.295 | 3.67E-05 |       |        |         |          | 0.012 | 1.217  | 0.295 | 3.67E-05 | +  |
| 3:19932864  | 3  | 19932864  |             | GA | GAA   | 0.81  | -0.45  | 0.105 | 1.78E-05 | 0.805 | -0.156 | 0.162   | 3.37E-01 | 0.809 | -0.363 | 0.088 | 3.69E-05 | -- |
| rs600859    | 9  | 79325558  | EFHB PRUNE2 | C  | G     | 0.35  | 0.287  | 0.091 | 1.58E-03 | 0.347 | 0.359  | 0.133   | 7.15E-03 | 0.349 | 0.31   | 0.075 | 3.69E-05 | ++ |
| rs116374491 | 2  | 62165741  | COMM D1     | T  | C     | 0.026 | 0.679  | 0.234 | 3.65E-03 | 0.025 | 0.975  | 0.323   | 2.53E-03 | 0.026 | 0.781  | 0.189 | 3.70E-05 | ++ |
| rs77498844  | 10 | 78098561  | C10orf11    | T  | C     | 0.064 | 0.637  | 0.16  | 7.05E-05 | 0.056 | 0.37   | 0.264   | 1.61E-01 | 0.062 | 0.566  | 0.137 | 3.71E-05 | ++ |
| rs74350986  | 10 | 78100631  | C10orf11    | A  | C     | 0.064 | 0.637  | 0.16  | 7.05E-05 | 0.056 | 0.37   | 0.264   | 1.61E-01 | 0.062 | 0.566  | 0.137 | 3.71E-05 | ++ |

1

|             |    |           |              |   |   |       |        |       |          |       |        |       |          |        |        |          |          |    |
|-------------|----|-----------|--------------|---|---|-------|--------|-------|----------|-------|--------|-------|----------|--------|--------|----------|----------|----|
| rs4723859   | 7  | 39366946  | POU6F2       | A | G | 0.187 | 0.372  | 0.107 | 4.99E-04 | 0.175 | 0.366  | 0.166 | 2.72E-02 | 0.184  | 0.37   | 0.09     | 3.73E-05 | ++ |
| rs76240807  | 3  | 89291465  | EPHA3        | A | T | 0.049 | 0.691  | 0.175 | 7.97E-05 | 0.047 | 0.411  | 0.28  | 1.43E-01 | 0.048  | 0.613  | 0.149    | 3.74E-05 | ++ |
| rs11767943  | 7  | 155735074 |              | A | G | 0.26  | 0.362  | 0.096 | 1.72E-04 | 0.328 | 0.254  | 0.14  | 7.01E-02 | 0.282  | 0.327  | 0.079    | 3.74E-05 | ++ |
| rs146564943 | 13 | 53666675  |              | T | G | 0.987 | -1.024 | 0.317 | 1.24E-03 | 0.988 | -1.124 | 0.437 | 1.02E-02 | 0.987  | -1.058 | 0.257    | 3.75E-05 | -- |
| rs4408686   | 2  | 28940526  |              | T | C | 0.651 | -0.3   | 0.091 | 9.79E-04 | 0.648 | -0.339 | 0.137 | 1.29E-02 | 0.65   | -0.312 | 0.076    | 3.76E-05 | -- |
| rs78176579  | 14 | 26219269  |              | A | C | 0.053 | 0.663  | 0.161 | 3.78E-05 |       |        |       | 0.053    | 0.663  | 0.161  | 3.78E-05 | +        |    |
| rs144623926 | 1  | 160676216 | CD48         | A | T | 0.031 | 0.863  | 0.209 | 3.81E-05 |       |        |       | 0.031    | 0.863  | 0.209  | 3.81E-05 | +        |    |
| rs115579283 | 1  | 160676291 | CD48         | T | C | 0.969 | -0.863 | 0.209 | 3.81E-05 |       |        |       | 0.969    | -0.863 | 0.209  | 3.81E-05 | -?       |    |
| rs12698352  | 7  | 155734985 |              | T | C | 0.261 | 0.36   | 0.096 | 1.76E-04 | 0.328 | 0.254  | 0.14  | 7.01E-02 | 0.282  | 0.327  | 0.079    | 3.81E-05 | ++ |
| rs13325223  | 3  | 66905590  |              | A | G | 0.91  | -0.394 | 0.142 | 5.41E-03 | 0.908 | -0.644 | 0.201 | 1.37E-03 | 0.909  | -0.477 | 0.116    | 3.82E-05 | -- |
| rs140854658 | 3  | 184996397 | EHHADH       | T | G | 0.011 | 1.042  | 0.308 | 7.04E-04 | 0.014 | 0.982  | 0.419 | 1.91E-02 | 0.012  | 1.021  | 0.248    | 3.82E-05 | ++ |
| rs260249    | 6  | 42397088  | TRERF1       | A | G | 0.761 | -0.434 | 0.105 | 3.83E-05 |       |        |       | 0.761    | -0.434 | 0.105  | 3.83E-05 | -?       |    |
| rs10165605  | 2  | 75828653  |              | A | G | 0.692 | -0.33  | 0.094 | 4.23E-04 | 0.692 | -0.303 | 0.142 | 3.30E-02 | 0.692  | -0.322 | 0.078    | 3.84E-05 | -- |
| rs17044311  | 4  | 113049268 |              | A | C | 0.928 | -0.378 | 0.152 | 1.28E-02 | 0.941 | -0.829 | 0.226 | 2.38E-04 | 0.932  | -0.518 | 0.126    | 3.84E-05 | -- |
| rs6964280   | 7  | 7185729   |              | A | G | 0.071 | 0.268  | 0.161 | 9.56E-02 | 0.071 | 1.01   | 0.217 | 3.13E-06 | 0.071  | 0.531  | 0.129    | 3.84E-05 | ++ |
| rs111513694 | 7  | 78104164  | MAGI2        | A | G | 0.016 | 1.072  | 0.274 | 8.94E-05 | 0.012 | 0.708  | 0.5   | 1.57E-01 | 0.015  | 0.988  | 0.24     | 3.86E-05 | ++ |
| rs113872230 | 7  | 78104595  | MAGI2        | T | C | 0.016 | 1.072  | 0.274 | 8.94E-05 | 0.012 | 0.708  | 0.5   | 1.57E-01 | 0.015  | 0.988  | 0.24     | 3.86E-05 | ++ |
| rs76758768  | 1  | 164416436 |              | A | T | 0.957 | -0.755 | 0.183 | 3.86E-05 |       |        |       | 0.957    | -0.755 | 0.183  | 3.86E-05 | -?       |    |
| rs117291995 | 18 | 31328564  | ASXL3        | A | G |       |        |       |          | 0.989 | -1.709 | 0.415 | 3.87E-05 | 0.989  | -1.709 | 0.415    | 3.87E-05 | -? |
| rs140240199 | 18 | 31344103  |              | T | C |       |        |       |          | 0.989 | -1.709 | 0.415 | 3.87E-05 | 0.989  | -1.709 | 0.415    | 3.87E-05 | -? |
| rs28372621  | 4  | 114721328 |              | T | C | 0.028 | 0.801  | 0.212 | 1.57E-04 | 0.033 | 0.54   | 0.305 | 7.69E-02 | 0.029  | 0.716  | 0.174    | 3.88E-05 | ++ |
| rs75984171  | 5  | 128806174 | ADAMTS19     | T | C | 0.019 | 1.004  | 0.244 | 3.89E-05 |       |        |       | 0.019    | 1.004  | 0.244  | 3.89E-05 | +        |    |
| rs9977916   | 21 | 36423454  |              | T | C | 0.965 | -0.801 | 0.195 | 3.89E-05 |       |        |       | 0.965    | -0.801 | 0.195  | 3.89E-05 | -?       |    |
| rs577993    | 9  | 79321871  | RUNX1 PRUNE2 | T | C | 0.454 | 0.283  | 0.09  | 1.61E-03 | 0.444 | 0.342  | 0.128 | 7.67E-03 | 0.45   | 0.303  | 0.074    | 3.90E-05 | ++ |
| rs76501672  | 5  | 89970231  | GPR98        | T | C | 0.943 | -0.578 | 0.168 | 5.63E-04 | 0.939 | -0.55  | 0.245 | 2.49E-02 | 0.942  | -0.569 | 0.138    | 3.90E-05 | -- |
| rs67135813  | 2  | 171028736 |              | T | C | 0.962 | -0.672 | 0.198 | 6.68E-04 | 0.957 | -0.596 | 0.257 | 2.03E-02 | 0.96   | -0.644 | 0.157    | 3.92E-05 | -- |
| rs57656489  | 17 | 19412550  | SLC47A1      | A | G | 0.152 | 0.473  | 0.115 | 3.92E-05 |       |        |       | 0.152    | 0.473  | 0.115  | 3.92E-05 | +        |    |

|             |    |           |                      |   |    |       |        |       |          |       |        |       |          |        |        |          |          |    |
|-------------|----|-----------|----------------------|---|----|-------|--------|-------|----------|-------|--------|-------|----------|--------|--------|----------|----------|----|
| rs73684022  | 7  | 27689695  | HIBAD<br>H           | T | C  | 0.988 | -1.247 | 0.303 | 3.94E-05 |       |        |       | 0.988    | -1.247 | 0.303  | 3.94E-05 | -?       |    |
| rs115390199 | 10 | 109951895 |                      | A | C  | 0.989 | -1.254 | 0.305 | 3.94E-05 |       |        |       | 0.989    | -1.254 | 0.305  | 3.94E-05 | -?       |    |
| rs2943811   | 11 | 61280720  |                      | A | G  | 0.386 | -0.37  | 0.09  | 3.96E-05 |       |        |       | 0.386    | -0.37  | 0.09   | 3.96E-05 | -?       |    |
| rs12488234  | 3  | 112191202 |                      | T | G  | 0.873 | -0.482 | 0.117 | 3.96E-05 |       |        |       | 0.873    | -0.482 | 0.117  | 3.96E-05 | -?       |    |
| rs115363570 | 16 | 19610886  | BTLA<br>C16orf6<br>2 | C | G  | 0.986 | -1.028 | 0.295 | 4.95E-04 | 0.99  | -1.071 | 0.491 | 2.91E-02 | 0.987  | -1.039 | 0.253    | 3.96E-05 | -- |
| rs11677127  | 2  | 28945646  |                      | T | C  | 0.612 | -0.29  | 0.09  | 1.34E-03 | 0.612 | -0.351 | 0.135 | 9.42E-03 | 0.612  | -0.309 | 0.075    | 3.98E-05 | -- |
| rs558693940 | 7  | 51751265  |                      | A | G  | 0.04  | 0.777  | 0.189 | 3.98E-05 |       |        |       | 0.04     | 0.777  | 0.189  | 3.98E-05 | +?       |    |
| rs80157892  | 7  | 78102623  |                      | T | C  | 0.984 | -1.055 | 0.273 | 1.11E-04 | 0.988 | -0.751 | 0.505 | 1.37E-01 | 0.985  | -0.986 | 0.24     | 3.99E-05 | -- |
| rs557429455 | 3  | 87936836  | MAGI2                | T | G  | 0.017 | 0.753  | 0.273 | 5.79E-03 | 0.019 | 1.175  | 0.37  | 1.48E-03 | 0.018  | 0.902  | 0.22     | 4.00E-05 | ++ |
| rs17049585  | 2  | 58828404  |                      | A | G  | 0.131 | 0.351  | 0.124 | 4.59E-03 | 0.121 | 0.581  | 0.185 | 1.65E-03 | 0.128  | 0.422  | 0.103    | 4.00E-05 | ++ |
| rs17049586  | 2  | 58828603  |                      | A | G  | 0.131 | 0.351  | 0.124 | 4.59E-03 | 0.121 | 0.581  | 0.185 | 1.65E-03 | 0.128  | 0.422  | 0.103    | 4.00E-05 | ++ |
| rs34193840  | 7  | 149009492 |                      | A | G  | 0.931 | -0.583 | 0.152 | 1.28E-04 | 0.946 | -0.418 | 0.265 | 1.15E-01 | 0.935  | -0.542 | 0.132    | 4.01E-05 | -- |
| rs7558175   | 2  | 221176925 |                      | T | C  | 0.314 | 0.332  | 0.092 | 2.97E-04 | 0.292 | 0.279  | 0.142 | 4.90E-02 | 0.307  | 0.316  | 0.077    | 4.01E-05 | ++ |
| rs60384186  | 10 | 1182830   |                      | T | C  | 0.662 | -0.34  | 0.091 | 1.75E-04 | 0.643 | -0.239 | 0.134 | 7.52E-02 | 0.656  | -0.309 | 0.075    | 4.01E-05 | -- |
| rs142753018 | 7  | 70666937  | WBSCR<br>17          | C | G  | 0.978 | -0.913 | 0.245 | 1.99E-04 | 0.981 | -0.722 | 0.405 | 7.45E-02 | 0.979  | -0.862 | 0.21     | 4.03E-05 | -- |
| rs148723799 | 1  | 56504658  |                      | C | G  | 0.013 | 1.196  | 0.291 | 4.03E-05 |       |        |       |          | 0.013  | 1.196  | 0.291    | 4.03E-05 | +? |
| rs575374    | 6  | 125427426 |                      | A | G  | 0.489 | -0.276 | 0.093 | 3.06E-03 | 0.496 | -0.374 | 0.129 | 3.63E-03 | 0.491  | -0.31  | 0.075    | 4.05E-05 | -- |
| rs554882892 | 7  | 148964886 |                      | T | TA | 0.885 | -0.482 | 0.124 | 1.07E-04 | 0.892 | -0.305 | 0.197 | 1.22E-01 | 0.887  | -0.431 | 0.105    | 4.10E-05 | -- |
| rs10137906  | 14 | 98490569  | ZNF783               | A | G  | 0.354 | 0.341  | 0.094 | 3.07E-04 | 0.371 | 0.265  | 0.132 | 4.53E-02 | 0.36   | 0.315  | 0.077    | 4.11E-05 | ++ |
| rs147239590 | 17 | 68033643  |                      | A | G  | 0.016 | 0.996  | 0.243 | 4.12E-05 |       |        |       |          | 0.016  | 0.996  | 0.243    | 4.12E-05 | +? |
| rs10197001  | 2  | 231961582 |                      | T | G  | 0.146 | 0.351  | 0.112 | 1.81E-03 | 0.143 | 0.463  | 0.17  | 6.58E-03 | 0.145  | 0.385  | 0.094    | 4.12E-05 | ++ |
| rs16844619  | 2  | 211422333 | PSMD1<br>CPS1        | A | C  | 0.697 | -0.378 | 0.091 | 3.32E-05 | 0.698 | -0.159 | 0.135 | 2.39E-01 | 0.697  | -0.31  | 0.075    | 4.12E-05 | -- |
| rs188577120 | 20 | 1833298   |                      | A | C  | 0.011 | 1.258  | 0.307 | 4.13E-05 |       |        |       |          | 0.011  | 1.258  | 0.307    | 4.13E-05 | +? |
| rs1471482   | 13 | 95804906  |                      | T | G  | 0.984 | -1.093 | 0.267 | 4.13E-05 |       |        |       |          | 0.984  | -1.093 | 0.267    | 4.13E-05 | -? |
| rs17104164  | 1  | 48581550  | ABCC4                | A | C  | 0.975 | -0.781 | 0.224 | 4.78E-04 | 0.962 | -0.625 | 0.285 | 2.85E-02 | 0.97   | -0.722 | 0.176    | 4.13E-05 | -- |
| rs10482934  | 21 | 24514388  |                      | T | C  | 0.027 | 0.624  | 0.215 | 3.66E-03 | 0.031 | 0.877  | 0.295 | 2.94E-03 | 0.028  | 0.712  | 0.174    | 4.13E-05 | ++ |
| rs6577044   | 13 | 114072735 |                      | A | G  | 0.535 | 0.383  | 0.093 | 4.14E-05 |       |        |       |          | 0.535  | 0.383  | 0.093    | 4.14E-05 | +? |
| rs77595058  | 2  | 159376166 | PKP4                 | A | G  | 0.97  | -0.706 | 0.219 | 1.27E-03 | 0.971 | -0.789 | 0.31  | 1.10E-02 | 0.97   | -0.734 | 0.179    | 4.14E-05 | -- |



|             |    |           |   |                           |       |        |       |          |       |        |       |          |       |        |       |          |    |
|-------------|----|-----------|---|---------------------------|-------|--------|-------|----------|-------|--------|-------|----------|-------|--------|-------|----------|----|
| rs56357646  | 6  | 21454061  | A | T                         | 0.903 | -0.544 | 0.133 | 4.15E-05 |       |        |       |          | 0.903 | -0.544 | 0.133 | 4.15E-05 | -? |
| rs72882068  | 2  | 171028588 | A | G                         | 0.962 | -0.669 | 0.197 | 7.11E-04 | 0.957 | -0.596 | 0.257 | 2.03E-02 | 0.96  | -0.641 | 0.157 | 4.16E-05 | -- |
| rs183654244 | 19 | 51308240  | A | G                         | 0.028 | 0.891  | 0.217 | 4.16E-05 |       |        |       |          | 0.028 | 0.891  | 0.217 | 4.16E-05 | ++ |
| rs1454566   | 2  | 221175540 | A | T                         | 0.314 | 0.331  | 0.092 | 3.09E-04 | 0.292 | 0.279  | 0.142 | 4.90E-02 | 0.308 | 0.316  | 0.077 | 4.16E-05 | ++ |
| rs80014032  | 12 | 7841342   | A | G                         | 0.943 | -0.643 | 0.157 | 4.16E-05 |       |        |       |          | 0.943 | -0.643 | 0.157 | 4.16E-05 | -? |
| rs2392654   | 2  | 221178879 | A | G                         | 0.314 | 0.332  | 0.092 | 2.90E-04 | 0.293 | 0.276  | 0.142 | 5.20E-02 | 0.307 | 0.316  | 0.077 | 4.17E-05 | ++ |
| rs2392656   | 2  | 221179018 | A | G                         | 0.314 | 0.332  | 0.092 | 2.90E-04 | 0.293 | 0.276  | 0.142 | 5.20E-02 | 0.307 | 0.316  | 0.077 | 4.17E-05 | ++ |
| rs76775172  | 14 | 25881071  | A | G                         | 0.027 | 0.72   | 0.221 | 1.11E-03 | 0.021 | 0.905  | 0.359 | 1.17E-02 | 0.026 | 0.771  | 0.188 | 4.17E-05 | ++ |
| rs77528954  | 2  | 29786204  | C | G                         | 0.024 | 0.941  | 0.232 | 4.84E-05 | 0.026 | 0.455  | 0.372 | 2.21E-01 | 0.025 | 0.805  | 0.197 | 4.19E-05 | ++ |
| rs114510183 | 3  | 25715367  | T | C                         | 0.014 | 1.203  | 0.294 | 4.20E-05 |       |        |       |          | 0.013 | 1.203  | 0.294 | 4.20E-05 | ++ |
| rs75022956  | 8  | 101673826 | A | G                         | 0.013 | 1.23   | 0.3   | 4.21E-05 |       |        |       |          | 0.013 | 1.23   | 0.3   | 4.21E-05 | ++ |
| rs2600777   | 2  | 237600633 | A | G                         | 0.545 | -0.367 | 0.089 | 4.21E-05 |       |        |       |          | 0.545 | -0.366 | 0.089 | 4.21E-05 | -? |
| rs691211    | 7  | 49875085  | A | G                         | 0.166 | -0.565 | 0.138 | 4.22E-05 |       |        |       |          | 0.166 | -0.565 | 0.138 | 4.22E-05 | -? |
| rs494446    | 7  | 49875687  | T | C                         | 0.166 | -0.565 | 0.138 | 4.22E-05 |       |        |       |          | 0.166 | -0.565 | 0.138 | 4.22E-05 | -? |
| rs564198758 | 3  | 164914205 | C | G                         | 0.035 | 0.642  | 0.209 | 2.11E-03 | 0.032 | 0.787  | 0.288 | 6.24E-03 | 0.034 | 0.692  | 0.169 | 4.22E-05 | ++ |
| rs12120330  | 1  | 48682729  | T | C                         | 0.026 | 0.752  | 0.222 | 7.14E-04 | 0.037 | 0.662  | 0.285 | 2.04E-02 | 0.03  | 0.718  | 0.175 | 4.23E-05 | ++ |
| rs11267622  | 9  | 79324135  | A | ATGA<br>CTGT<br>TGCA<br>G | 0.568 | -0.278 | 0.088 | 1.64E-03 | 0.58  | -0.342 | 0.129 | 8.03E-03 | 0.572 | -0.298 | 0.073 | 4.23E-05 | -- |
| rs9504286   | 6  | 4894705   | A | G                         | 0.035 | 0.824  | 0.201 | 4.24E-05 |       |        |       |          | 0.035 | 0.824  | 0.201 | 4.24E-05 | ++ |
| rs13394402  | 2  | 231968920 | T | G                         | 0.146 | 0.35   | 0.112 | 1.86E-03 | 0.143 | 0.463  | 0.17  | 6.58E-03 | 0.145 | 0.384  | 0.094 | 4.24E-05 | ++ |
| rs60484735  | 2  | 28959995  | T | TG                        | 0.616 | -0.29  | 0.09  | 1.25E-03 | 0.617 | -0.342 | 0.134 | 1.11E-02 | 0.616 | -0.306 | 0.075 | 4.24E-05 | -- |
| rs7160380   | 14 | 77357190  | A | G                         | 0.949 | -0.688 | 0.168 | 4.25E-05 |       |        |       |          | 0.949 | -0.688 | 0.168 | 4.25E-05 | -? |
| rs115322324 | 4  | 158155410 | T | C                         | 0.982 | -1.01  | 0.243 | 3.14E-05 | 0.983 | -0.395 | 0.518 | 4.46E-01 | 0.982 | -0.899 | 0.22  | 4.25E-05 | -- |
| rs149805559 | 19 | 22403270  | T | TG                        | 0.419 | -0.358 | 0.088 | 4.25E-05 |       |        |       |          | 0.419 | -0.358 | 0.088 | 4.25E-05 | -? |
| rs185197163 | 18 | 31092239  | A | G                         | 0.016 | 0.85   | 0.284 | 2.82E-03 | 0.013 | 1.331  | 0.453 | 3.30E-03 | 0.015 | 0.986  | 0.241 | 4.27E-05 | ++ |
| rs79461887  | 5  | 105928001 | T | G                         | 0.953 | -0.724 | 0.177 | 4.28E-05 |       |        |       |          | 0.953 | -0.724 | 0.177 | 4.28E-05 | -? |
| rs421842    | 10 | 132189360 | A | G                         | 0.679 | 0.366  | 0.098 | 2.00E-04 | 0.679 | 0.271  | 0.152 | 7.42E-02 | 0.679 | 0.338  | 0.083 | 4.29E-05 | ++ |
| rs143377417 | 19 | 44302154  | C | G                         | 0.988 | -1.441 | 0.309 | 3.14E-06 | 0.988 | 0.378  | 0.731 | 6.05E-01 | 0.988 | -1.165 | 0.285 | 4.29E-05 | +- |

|             |    |           |               |       |      |       |        |       |          |       |        |       |          |       |        |          |          |    |
|-------------|----|-----------|---------------|-------|------|-------|--------|-------|----------|-------|--------|-------|----------|-------|--------|----------|----------|----|
|             | 7  | 118144654 |               | .Cn0. | T    |       |        |       |          |       |        |       | 0.034    | 0.707 | 0.173  | 4.29E-05 | ++       |    |
| rs1046691   | 7  | 129473739 | UBE2H         | T     | C    | 0.253 | -0.391 | 0.111 | 4.18E-04 | 0.25  | -0.352 | 0.17  | 3.76E-02 | 0.252 | -0.379 | 0.093    | 4.30E-05 | -- |
| rs72681775  | 4  | 162338341 | FSTL5         | A     | C    | 0.093 | 0.53   | 0.138 | 1.26E-04 | 0.1   | 0.336  | 0.207 | 1.04E-01 | 0.095 | 0.47   | 0.115    | 4.31E-05 | ++ |
| rs7541119   | 1  | 113448204 |               | C     | G    | 0.892 | -0.383 | 0.126 | 2.27E-03 | 0.892 | -0.517 | 0.186 | 5.32E-03 | 0.892 | -0.425 | 0.104    | 4.33E-05 | -- |
| rs190379195 | 5  | 89223135  |               | A     | T    | 0.059 | 0.659  | 0.161 | 4.34E-05 |       |        |       |          | 0.059 | 0.659  | 0.161    | 4.34E-05 | +  |
| rs147393275 | 20 | 40794675  | PTPRT         | T     | C    | 0.014 | 1.284  | 0.314 | 4.35E-05 |       |        |       |          | 0.014 | 1.284  | 0.314    | 4.35E-05 | +  |
| rs144562261 | 20 | 40823799  | PTPRT         | A     | T    | 0.986 | -1.284 | 0.314 | 4.35E-05 |       |        |       |          | 0.986 | -1.284 | 0.314    | 4.35E-05 | -? |
| rs146643653 | 4  | 83756238  | SEC31A        | A     | G    | 0.027 | 0.878  | 0.215 | 4.35E-05 |       |        |       |          | 0.026 | 0.878  | 0.215    | 4.35E-05 | +  |
| rs148801384 | 3  | 177357025 |               | T     | TTTA | 0.044 | 0.518  | 0.195 | 7.88E-03 | 0.046 | 0.832  | 0.255 | 1.13E-03 | 0.045 | 0.634  | 0.155    | 4.36E-05 | ++ |
| rs7175483   | 15 | 45068394  |               | C     | G    | 0.286 | 0.382  | 0.093 | 4.36E-05 |       |        |       |          | 0.286 | 0.382  | 0.093    | 4.36E-05 | +  |
| rs145535352 | 7  | 125418024 |               | T     | C    | 0.055 | 0.688  | 0.168 | 4.37E-05 |       |        |       |          | 0.055 | 0.688  | 0.168    | 4.37E-05 | +  |
| rs269367    | 3  | 19860421  |               | A     | C    | 0.829 | -0.442 | 0.108 | 4.37E-05 |       |        |       |          | 0.829 | -0.442 | 0.108    | 4.37E-05 | -? |
| rs269366    | 3  | 19861406  |               | T     | C    | 0.171 | 0.442  | 0.108 | 4.37E-05 |       |        |       |          | 0.171 | 0.442  | 0.108    | 4.37E-05 | +  |
| rs149460283 | 15 | 44082151  | RP11-296A16.1 | T     | C    | 0.045 | 0.699  | 0.177 | 7.82E-05 | 0.038 | 0.405  | 0.3   | 1.78E-01 | 0.043 | 0.623  | 0.152    | 4.37E-05 | ++ |
| rs374825463 | 15 | 44097811  | MFAP1         | A     | ATTC | 0.045 | 0.699  | 0.177 | 7.82E-05 | 0.038 | 0.405  | 0.3   | 1.78E-01 | 0.043 | 0.623  | 0.152    | 4.37E-05 | ++ |
| rs115362284 | 15 | 44101320  | MFAP1         | T     | C    | 0.955 | -0.699 | 0.177 | 7.82E-05 | 0.962 | -0.405 | 0.3   | 1.78E-01 | 0.957 | -0.623 | 0.152    | 4.37E-05 | -- |
| rs796638992 | 10 | 92095335  |               | A     | AAT  | 0.057 | 0.688  | 0.168 | 4.38E-05 |       |        |       |          | 0.057 | 0.688  | 0.168    | 4.38E-05 | +  |
| rs550867697 | 19 | 40890200  | HIPK4         | T     | TTTT | 0.976 | -0.901 | 0.232 | 1.04E-04 | 0.984 | -0.632 | 0.457 | 1.67E-01 | 0.977 | -0.846 | 0.207    | 4.38E-05 | -- |
| rs55835850  | 2  | 28949296  |               | T     | G    | 0.62  | -0.296 | 0.09  | 9.95E-04 | 0.618 | -0.326 | 0.134 | 1.52E-02 | 0.619 | -0.305 | 0.075    | 4.39E-05 | -- |
| rs683866    | 9  | 79322068  | PRUNE2        | T     | G    | 0.431 | 0.277  | 0.088 | 1.74E-03 | 0.42  | 0.344  | 0.129 | 7.87E-03 | 0.427 | 0.298  | 0.073    | 4.40E-05 | ++ |
| rs2760207   | 10 | 9103606   |               | C     | G    | 0.011 | 1.297  | 0.317 | 4.40E-05 |       |        |       |          | 0.011 | 1.297  | 0.317    | 4.40E-05 | +  |
| rs1456999   | 14 | 98466345  |               | A     | G    | 0.328 | 0.271  | 0.097 | 5.16E-03 | 0.342 | 0.451  | 0.143 | 1.61E-03 | 0.332 | 0.328  | 0.08     | 4.42E-05 | ++ |
| rs11263642  | 11 | 69147825  | MYEOV         | A     | G    | 0.988 | -1.275 | 0.312 | 4.44E-05 |       |        |       |          | 0.988 | -1.275 | 0.312    | 4.44E-05 | -? |
| rs11263459  | 11 | 69156605  | MYEOV         | A     | G    | 0.012 | 1.275  | 0.312 | 4.44E-05 |       |        |       |          | 0.012 | 1.275  | 0.312    | 4.44E-05 | +  |
| rs8031239   | 15 | 33071184  | FMN1          | A     | C    | 0.948 | -0.552 | 0.179 | 2.06E-03 | 0.949 | -0.677 | 0.25  | 6.74E-03 | 0.949 | -0.594 | 0.146    | 4.45E-05 | -- |
| rs191902897 | 15 | 44145965  | WDR76         | A     | G    | 0.035 | 0.808  | 0.189 | 1.85E-05 | 0.024 | 0.19   | 0.407 | 6.40E-01 | 0.034 | 0.699  | 0.171    | 4.46E-05 | ++ |
| rs76696690  | 5  | 67551343  | PIK3R1        | A     | C    | 0.988 | -1.083 | 0.33  | 1.04E-03 | 0.988 | -1.131 | 0.465 | 1.50E-02 | 0.988 | -1.099 | 0.269    | 4.47E-05 | -- |

|             |    |           |              |    |      |       |        |       |          |       |        |       |          |       |        |       |          |    |
|-------------|----|-----------|--------------|----|------|-------|--------|-------|----------|-------|--------|-------|----------|-------|--------|-------|----------|----|
| rs9978607   | 21 | 36435884  | RUNX1        | A  | G    | 0.947 | -0.733 | 0.163 | 6.78E-06 | 0.944 | -0.087 | 0.295 | 7.68E-01 | 0.946 | -0.582 | 0.142 | 4.47E-05 | -- |
| rs13050576  | 21 | 36444219  | RUNX1        | C  | G    | 0.948 | -0.73  | 0.163 | 7.54E-06 | 0.945 | -0.097 | 0.297 | 7.44E-01 | 0.947 | -0.583 | 0.143 | 4.47E-05 | -- |
| rs12447761  | 16 | 62760182  |              | A  | G    | 0.1   | 0.42   | 0.134 | 1.68E-03 | 0.116 | 0.471  | 0.18  | 8.91E-03 | 0.106 | 0.439  | 0.107 | 4.48E-05 | ++ |
| rs1026684   | 14 | 98461877  |              | A  | T    | 0.674 | -0.271 | 0.097 | 5.24E-03 | 0.658 | -0.451 | 0.143 | 1.61E-03 | 0.669 | -0.328 | 0.08  | 4.48E-05 | -- |
| rs114467552 | 4  | 83913889  | LIN54        | A  | G    | 0.03  | 0.843  | 0.207 | 4.49E-05 |       |        |       |          | 0.03  | 0.843  | 0.207 | 4.49E-05 | +  |
| rs187348106 | 4  | 83914623  | LIN54        | A  | G    | 0.03  | 0.843  | 0.207 | 4.49E-05 |       |        |       |          | 0.03  | 0.843  | 0.207 | 4.49E-05 | +  |
| rs58828596  | 4  | 83915164  | LIN54        | CA | C    | 0.97  | -0.843 | 0.207 | 4.49E-05 |       |        |       |          | 0.97  | -0.843 | 0.207 | 4.49E-05 | -? |
| rs115657017 | 4  | 83923853  | LIN54        | T  | G    | 0.03  | 0.843  | 0.207 | 4.49E-05 |       |        |       |          | 0.03  | 0.843  | 0.207 | 4.49E-05 | +  |
| rs116252662 | 4  | 83928348  | LIN54        | T  | C    | 0.97  | -0.843 | 0.207 | 4.49E-05 |       |        |       |          | 0.97  | -0.843 | 0.207 | 4.49E-05 | -? |
| rs56689651  | 4  | 83928825  | LIN54        | A  | G    | 0.03  | 0.843  | 0.207 | 4.49E-05 |       |        |       |          | 0.03  | 0.843  | 0.207 | 4.49E-05 | +  |
| rs10590980  | 15 | 80516154  |              | CA | C    | 0.577 | 0.32   | 0.093 | 5.84E-04 | 0.568 | 0.295  | 0.134 | 2.77E-02 | 0.574 | 0.312  | 0.076 | 4.50E-05 | ++ |
| rs112565517 | 3  | 120740331 | STXBP5L      | A  | G    | 0.043 | 0.767  | 0.188 | 4.51E-05 |       |        |       |          | 0.043 | 0.767  | 0.188 | 4.51E-05 | +  |
| rs2523811   | 6  | 29849333  |              | T  | C    | 0.2   | 0.354  | 0.108 | 9.90E-04 | 0.19  | 0.362  | 0.151 | 1.61E-02 | 0.197 | 0.357  | 0.087 | 4.52E-05 | ++ |
| rs201500531 | 15 | 44651787  | CASC4        | A  | AAAA | 0.075 | 0.614  | 0.15  | 4.52E-05 |       |        |       |          | 0.075 | 0.614  | 0.15  | 4.52E-05 | +  |
| rs534247    | 1  | 90239523  | RP11-302M6.4 | A  | G    | 0.067 | -1.107 | 0.271 | 4.53E-05 |       |        |       |          | 0.067 | -1.107 | 0.272 | 4.53E-05 | -? |
| rs77197270  | 3  | 136914848 |              | A  | G    | 0.018 | 0.987  | 0.26  | 1.48E-04 | 0.018 | 0.662  | 0.403 | 1.01E-01 | 0.018 | 0.892  | 0.219 | 4.54E-05 | ++ |
| rs41361451  | 6  | 148402361 |              | T  | C    | 0.088 | -0.658 | 0.195 | 7.46E-04 | 0.08  | -0.701 | 0.305 | 2.16E-02 | 0.086 | -0.67  | 0.164 | 4.54E-05 | -- |
| rs10444219  | 11 | 11771122  |              | T  | C    | 0.966 | -0.815 | 0.2   | 4.54E-05 |       |        |       |          | 0.966 | -0.815 | 0.2   | 4.54E-05 | -? |
| rs73696166  | 8  | 97022789  |              | A  | T    | 0.018 | 1.059  | 0.26  | 4.55E-05 |       |        |       |          | 0.018 | 1.059  | 0.26  | 4.55E-05 | +  |
| rs2206430   | 20 | 41320638  | PTPRT        | A  | G    | 0.907 | -0.439 | 0.135 | 1.09E-03 | 0.9   | -0.441 | 0.181 | 1.47E-02 | 0.904 | -0.44  | 0.108 | 4.55E-05 | -- |
| rs116809469 | 10 | 128206436 | C10orf90     | A  | G    | 0.022 | 0.717  | 0.258 | 5.48E-03 | 0.017 | 1.288  | 0.4   | 1.30E-03 | 0.021 | 0.884  | 0.217 | 4.55E-05 | ++ |
| rs12133441  | 1  | 41889513  |              | A  | C    | 0.368 | -0.397 | 0.097 | 4.56E-05 |       |        |       |          | 0.368 | -0.397 | 0.097 | 4.56E-05 | -? |
| rs72572451  | 7  | 7192963   |              | T  | G    | 0.07  | 0.277  | 0.164 | 9.02E-02 | 0.071 | 0.968  | 0.215 | 6.66E-06 | 0.07  | 0.531  | 0.13  | 4.56E-05 | ++ |
| rs12745431  | 1  | 104741819 |              | A  | G    | 0.035 | 0.503  | 0.204 | 1.37E-02 | 0.04  | 0.915  | 0.263 | 5.12E-04 | 0.036 | 0.657  | 0.161 | 4.58E-05 | ++ |
| rs12128656  | 1  | 48625257  |              | A  | C    | 0.022 | 0.798  | 0.233 | 6.11E-04 | 0.035 | 0.656  | 0.293 | 2.51E-02 | 0.027 | 0.743  | 0.182 | 4.58E-05 | ++ |
| rs6102997   | 20 | 41330578  | PTPRT        | A  | C    | 0.907 | -0.449 | 0.135 | 8.89E-04 | 0.899 | -0.424 | 0.18  | 1.82E-02 | 0.904 | -0.44  | 0.108 | 4.59E-05 | -- |
| rs11459392  | 11 | 77143347  | PAK1         | T  | TA   | 0.254 | 0.309  | 0.103 | 2.61E-03 | 0.28  | 0.391  | 0.14  | 5.33E-03 | 0.263 | 0.338  | 0.083 | 4.60E-05 | ++ |

|             |    |           |              |   |           |       |        |       |          |       |        |       |          |       |        |       |          |    |
|-------------|----|-----------|--------------|---|-----------|-------|--------|-------|----------|-------|--------|-------|----------|-------|--------|-------|----------|----|
| rs72983619  | 2  | 232004469 | PSMD1        | A | G         | 0.146 | 0.352  | 0.112 | 1.76E-03 | 0.144 | 0.449  | 0.169 | 7.90E-03 | 0.145 | 0.382  | 0.094 | 4.60E-05 | ++ |
| rs34669904  | 19 | 5166659   | PTPRS        | C | G         | 0.016 | 0.978  | 0.24  | 4.61E-05 |       |        |       |          | 0.016 | 0.978  | 0.24  | 4.61E-05 | +  |
| rs148816524 | 3  | 32508181  | CMTM7        | A | G         | 0.032 | 0.782  | 0.211 | 2.04E-04 | 0.029 | 0.568  | 0.322 | 7.76E-02 | 0.031 | 0.718  | 0.176 | 4.62E-05 | ++ |
| rs142571666 | 3  | 32508182  | CMTM7        | T | C         | 0.032 | 0.782  | 0.211 | 2.04E-04 | 0.029 | 0.568  | 0.322 | 7.76E-02 | 0.031 | 0.718  | 0.176 | 4.62E-05 | ++ |
| rs4383075   | 14 | 98485019  |              | A | G         | 0.665 | -0.309 | 0.098 | 1.60E-03 | 0.645 | -0.366 | 0.141 | 9.40E-03 | 0.658 | -0.328 | 0.08  | 4.62E-05 | -- |
| rs139094978 | 11 | 101771431 | ANGPT<br>L5  | T | TG        | 0.019 | 1.022  | 0.251 | 4.62E-05 |       |        |       |          | 0.019 | 1.022  | 0.251 | 4.62E-05 | +  |
| rs10809034  | 9  | 10171341  | PTPRD        | T | C         | 0.64  | -0.254 | 0.092 | 5.91E-03 | 0.621 | -0.435 | 0.136 | 1.38E-03 | 0.634 | -0.311 | 0.076 | 4.63E-05 | -- |
| rs113000305 | 3  | 120792232 | STXBP<br>5L  | T | C         | 0.957 | -0.766 | 0.188 | 4.63E-05 |       |        |       |          | 0.957 | -0.766 | 0.188 | 4.63E-05 | -? |
| rs145057131 | 2  | 184700120 |              | T | C         | 0.982 | -0.675 | 0.273 | 1.34E-02 | 0.988 | -1.537 | 0.419 | 2.45E-04 | 0.984 | -0.932 | 0.229 | 4.63E-05 | -- |
| rs115455755 | 5  | 5395028   |              | T | C         | 0.015 | 1.115  | 0.274 | 4.65E-05 |       |        |       |          | 0.015 | 1.115  | 0.274 | 4.65E-05 | +  |
| rs78667814  | 12 | 12612913  | LOH12<br>CR1 | T | C         | 0.017 | 0.711  | 0.261 | 6.37E-03 | 0.02  | 1.009  | 0.325 | 1.89E-03 | 0.018 | 0.828  | 0.203 | 4.65E-05 | ++ |
| rs77282240  | 12 | 12612914  | LOH12<br>CR1 | A | G         | 0.983 | -0.711 | 0.261 | 6.37E-03 | 0.98  | -1.009 | 0.325 | 1.89E-03 | 0.982 | -0.828 | 0.203 | 4.65E-05 | -- |
| rs77977190  | 12 | 12613418  | LOH12<br>CR1 | A | C         | 0.017 | 0.711  | 0.261 | 6.37E-03 | 0.02  | 1.009  | 0.325 | 1.89E-03 | 0.018 | 0.828  | 0.203 | 4.65E-05 | ++ |
| rs9988866   | 11 | 18392983  |              | A | T         | 0.457 | 0.285  | 0.089 | 1.38E-03 | 0.451 | 0.306  | 0.121 | 1.17E-02 | 0.455 | 0.293  | 0.072 | 4.67E-05 | ++ |
| rs115364762 | 4  | 175342106 |              | A | T         | 0.989 | -1.08  | 0.317 | 6.57E-04 | 0.982 | -0.918 | 0.408 | 2.44E-02 | 0.986 | -1.019 | 0.25  | 4.67E-05 | -- |
| rs6963862   | 7  | 55360709  |              | T | C         | 0.026 | 0.425  | 0.257 | 9.79E-02 | 0.028 | 1.242  | 0.291 | 1.91E-05 | 0.027 | 0.783  | 0.192 | 4.67E-05 | ++ |
| rs11232877  | 11 | 81516733  |              | A | C         | 0.232 | 0.348  | 0.102 | 6.25E-04 | 0.224 | 0.325  | 0.147 | 2.70E-02 | 0.229 | 0.341  | 0.084 | 4.68E-05 | ++ |
| rs149616570 | 7  | 7179232   |              | T | TTTT<br>G | 0.071 | 0.272  | 0.156 | 8.12E-02 | 0.071 | 0.986  | 0.217 | 5.45E-06 | 0.071 | 0.515  | 0.127 | 4.69E-05 | ++ |
| rs17049573  | 2  | 58824027  |              | A | G         | 0.934 | -0.501 | 0.16  | 1.70E-03 | 0.94  | -0.615 | 0.234 | 8.71E-03 | 0.935 | -0.537 | 0.132 | 4.70E-05 | -- |
| rs546227723 | 5  | 179115420 | CANX         | A | G         | 0.986 | -1.165 | 0.286 | 4.70E-05 |       |        |       |          | 0.986 | -1.165 | 0.286 | 4.70E-05 | -? |
| rs6876641   | 5  | 133394222 |              | A | G         | 0.039 | 0.648  | 0.184 | 4.22E-04 | 0.049 | 0.541  | 0.263 | 3.94E-02 | 0.042 | 0.613  | 0.151 | 4.71E-05 | ++ |
| rs12253810  | 10 | 15116387  |              | T | C         | 0.13  | 0.399  | 0.124 | 1.31E-03 | 0.126 | 0.462  | 0.184 | 1.20E-02 | 0.129 | 0.419  | 0.103 | 4.71E-05 | ++ |
| rs6102993   | 20 | 41325748  | PTPRT        | T | C         | 0.093 | 0.438  | 0.135 | 1.13E-03 | 0.1   | 0.441  | 0.181 | 1.47E-02 | 0.096 | 0.439  | 0.108 | 4.71E-05 | ++ |
| rs79276019  | 11 | 87915452  |              | A | C         | 0.032 | 0.933  | 0.211 | 9.62E-06 | 0.021 | 0.084  | 0.437 | 8.48E-01 | 0.03  | 0.773  | 0.19  | 4.71E-05 | ++ |
| rs113311734 | 9  | 97432670  |              | A | C         | 0.024 | 0.588  | 0.246 | 1.69E-02 | 0.035 | 0.952  | 0.277 | 5.87E-04 | 0.029 | 0.749  | 0.184 | 4.71E-05 | ++ |
| rs7800072   | 7  | 84628989  | SEMA3<br>D   | T | G         | 0.613 | 0.369  | 0.098 | 1.67E-04 | 0.642 | 0.243  | 0.142 | 8.74E-02 | 0.622 | 0.329  | 0.081 | 4.72E-05 | ++ |
| rs113337491 | 17 | 19410528  | SLC47A<br>1  | A | G         | 0.828 | -0.455 | 0.112 | 4.72E-05 |       |        |       |          | 0.828 | -0.455 | 0.112 | 4.72E-05 | -? |
| rs75306303  | 6  | 120859306 |              | A | G         | 0.044 | 0.613  | 0.181 | 6.88E-04 | 0.04  | 0.631  | 0.281 | 2.49E-02 | 0.043 | 0.618  | 0.152 | 4.73E-05 | ++ |

|             |    |           |          |                                                      |      |       |        |       |          |       |        |       |          |       |        |       |          |    |
|-------------|----|-----------|----------|------------------------------------------------------|------|-------|--------|-------|----------|-------|--------|-------|----------|-------|--------|-------|----------|----|
| rs6872882   | 5  | 165523674 |          | T                                                    | C    | 0.517 | 0.353  | 0.087 | 4.73E-05 |       |        |       |          | 0.517 | 0.353  | 0.087 | 4.73E-05 | ++ |
| rs111601119 | 16 | 87084565  |          | T                                                    | G    | 0.015 | 1.146  | 0.282 | 4.73E-05 |       |        |       |          | 0.015 | 1.146  | 0.282 | 4.73E-05 | ++ |
| rs111279925 | 16 | 1233151   | CACNA1H  | A                                                    | C    | 0.847 | -0.455 | 0.112 | 4.75E-05 |       |        |       |          | 0.847 | -0.456 | 0.112 | 4.75E-05 | -? |
| rs150876893 | 15 | 95548969  |          | CAT                                                  | C    | 0.983 | -1.099 | 0.27  | 4.77E-05 |       |        |       |          | 0.983 | -1.099 | 0.27  | 4.77E-05 | -? |
| rs288925    | 1  | 69832182  |          | A                                                    | G    | 0.092 | 0.487  | 0.138 | 4.21E-04 | 0.095 | 0.421  | 0.206 | 4.12E-02 | 0.093 | 0.467  | 0.115 | 4.78E-05 | ++ |
| rs190835    | 1  | 69833286  |          | C                                                    | G    | 0.908 | -0.487 | 0.138 | 4.21E-04 | 0.905 | -0.421 | 0.206 | 4.12E-02 | 0.907 | -0.467 | 0.115 | 4.78E-05 | -- |
| rs112761653 | 19 | 13656974  | CACNA1A  | C                                                    | G    | 0.943 | -0.689 | 0.169 | 4.78E-05 |       |        |       |          | 0.944 | -0.689 | 0.17  | 4.78E-05 | -? |
| rs143318748 | 7  | 108570255 |          | T                                                    | TTTG | 0.022 | 0.622  | 0.266 | 1.92E-02 | 0.018 | 1.358  | 0.367 | 2.17E-04 | 0.021 | 0.875  | 0.215 | 4.80E-05 | ++ |
| rs114897748 | 2  | 213097090 | ERBB4    | T                                                    | C    | 0.968 | -0.732 | 0.199 | 2.25E-04 | 0.969 | -0.609 | 0.351 | 8.28E-02 | 0.968 | -0.702 | 0.173 | 4.80E-05 | -- |
| rs73445186  | 15 | 84915085  |          | T                                                    | G    | 0.137 | 0.306  | 0.125 | 1.42E-02 | 0.13  | 0.588  | 0.168 | 4.48E-04 | 0.134 | 0.407  | 0.1   | 4.81E-05 | ++ |
| rs73445187  | 15 | 84915095  |          | A                                                    | G    | 0.863 | -0.306 | 0.125 | 1.42E-02 | 0.87  | -0.588 | 0.168 | 4.48E-04 | 0.866 | -0.407 | 0.1   | 4.81E-05 | -- |
| rs150134041 | 10 | 78084476  | C10orf11 | A                                                    | AT   | 0.065 | 0.634  | 0.158 | 6.33E-05 | 0.058 | 0.326  | 0.265 | 2.19E-01 | 0.063 | 0.553  | 0.136 | 4.82E-05 | ++ |
| rs188093489 | 3  | 185009943 | MAP3K13  | A                                                    | C    | 0.988 | -1.015 | 0.306 | 9.00E-04 | 0.986 | -0.982 | 0.419 | 1.91E-02 | 0.988 | -1.004 | 0.247 | 4.84E-05 | -- |
| rs146629096 | 6  | 21454312  |          | A                                                    | G    | 0.898 | -0.535 | 0.132 | 4.85E-05 |       |        |       |          | 0.898 | -0.535 | 0.132 | 4.85E-05 | -? |
| rs55721532  | 2  | 28938968  |          | A                                                    | G    | 0.645 | -0.286 | 0.092 | 1.78E-03 | 0.645 | -0.36  | 0.137 | 8.41E-03 | 0.645 | -0.309 | 0.076 | 4.86E-05 | -- |
| rs78983383  | 5  | 89518212  |          | C                                                    | G    | 0.895 | -0.455 | 0.132 | 5.78E-04 | 0.902 | -0.422 | 0.195 | 3.06E-02 | 0.897 | -0.445 | 0.11  | 4.86E-05 | -- |
| rs112620303 | 19 | 13658598  | CACNA1A  | A                                                    | C    | 0.057 | 0.685  | 0.169 | 4.87E-05 |       |        |       |          | 0.057 | 0.685  | 0.169 | 4.87E-05 | ++ |
| rs57767815  | 11 | 81513081  |          | A                                                    | C    | 0.251 | 0.371  | 0.102 | 2.87E-04 | 0.24  | 0.278  | 0.146 | 5.72E-02 | 0.247 | 0.34   | 0.084 | 4.87E-05 | ++ |
| rs370517012 | 11 | 1905146   |          | G                                                    | GT   | 0.033 | 0.843  | 0.208 | 4.90E-05 |       |        |       |          | 0.033 | 0.843  | 0.208 | 4.90E-05 | ++ |
| rs6710959   | 2  | 28958603  | LSP1     | T                                                    | C    | 0.615 | -0.287 | 0.09  | 1.45E-03 | 0.617 | -0.342 | 0.134 | 1.11E-02 | 0.615 | -0.304 | 0.075 | 4.91E-05 | -- |
| rs57501094  | 2  | 28959965  |          | CAGC<br>TCAC<br>TGCA<br>GCTT<br>CAAC<br>CTCC<br>CTGG | C    | 0.385 | 0.287  | 0.09  | 1.45E-03 | 0.383 | 0.342  | 0.134 | 1.11E-02 | 0.385 | 0.304  | 0.075 | 4.91E-05 | ++ |
| rs140326363 | 2  | 62142426  | COMM1    | A                                                    | C    | 0.026 | 0.671  | 0.236 | 4.50E-03 | 0.026 | 0.963  | 0.322 | 2.79E-03 | 0.026 | 0.773  | 0.19  | 4.92E-05 | ++ |
| rs75613455  | 12 | 12209702  | BCL2L14  | A                                                    | G    | 0.088 | -0.673 | 0.195 | 5.69E-04 | 0.08  | -0.641 | 0.298 | 3.17E-02 | 0.086 | -0.664 | 0.164 | 4.92E-05 | -- |
| rs12432932  | 14 | 92976023  |          | T                                                    | C    | 0.03  | 0.885  | 0.218 | 4.93E-05 |       |        |       |          | 0.029 | 0.885  | 0.218 | 4.93E-05 | ++ |
| rs7132453   | 12 | 63636174  |          | T                                                    | C    | 0.192 | 0.354  | 0.106 | 8.00E-04 | 0.209 | 0.35   | 0.153 | 2.22E-02 | 0.198 | 0.352  | 0.087 | 4.95E-05 | ++ |

|             |    |           |                                      |   |   |       |        |       |          |       |       |       |          |       |        |       |          |    |
|-------------|----|-----------|--------------------------------------|---|---|-------|--------|-------|----------|-------|-------|-------|----------|-------|--------|-------|----------|----|
| rs115140013 | 3  | 197279694 | BDH1<br>BDH1<br>PRR5-<br>ARHGA<br>P8 | A | G | 0.984 | -1.17  | 0.288 | 4.96E-05 |       |       |       |          | 0.984 | -1.17  | 0.288 | 4.96E-05 | -? |
| rs182396116 | 3  | 197282754 |                                      | T | G | 0.016 | 1.17   | 0.288 | 4.96E-05 |       |       |       |          | 0.016 | 1.17   | 0.288 | 4.96E-05 | +? |
| rs112861115 | 22 | 45196607  |                                      | A | G | 0.508 | -0.347 | 0.085 | 4.97E-05 |       |       |       |          | 0.508 | -0.347 | 0.086 | 4.97E-05 | -? |
| rs7235954   | 18 | 22596041  |                                      | C | G | 0.492 | 0.389  | 0.092 | 2.19E-05 | 0.488 | 0.128 | 0.141 | 3.63E-01 | 0.491 | 0.312  | 0.077 | 4.97E-05 | ++ |
| rs9711993   | 2  | 239684289 |                                      | A | G | 0.721 | -0.391 | 0.096 | 4.98E-05 |       |       |       |          | 0.721 | -0.391 | 0.096 | 4.98E-05 | -? |

**Table S2. Top Findings in European-Americans ( $p < 5.0 \times 10^{-5}$ ).**

| Marker      | Chr | Pos (hg19) | Gene name | Eff Allele | Alt Allele           | Alle Freq YP1 | Beta YP1 | SE YP1 | <i>P</i> YP1 | Alle Freq YP2 | Beta YP1 | SE YP2 | <i>P</i> YP2 | Alle Freq Meta | Beta Meta | SE Meta | <i>P</i> Meta | Direction |
|-------------|-----|------------|-----------|------------|----------------------|---------------|----------|--------|--------------|---------------|----------|--------|--------------|----------------|-----------|---------|---------------|-----------|
| rs12684088  | 9   | 103880173  | LPPR1     | A          | T                    | 0.033         | 1.226    | 0.241  | 3.53E-07     |               |          |        |              | 0.033          | 1.226     | 0.241   | 3.53E-07      | +?        |
| rs56073857  | 8   | 2703779    |           | A          | C                    | 0.011         | 1.989    | 0.397  | 5.61E-07     |               |          |        |              | 0.011          | 1.989     | 0.397   | 5.61E-07      | +?        |
| rs11030846  | 11  | 29872433   |           | A          | G                    | 0.099         | 0.61     | 0.184  | 9.14E-04     | 0.096         | 0.803    | 0.211  | 1.45E-04     | 0.098          | 0.693     | 0.139   | 5.85E-07      | ++        |
| rs7853968   | 9   | 103890732  | LPPR1     | C          | G                    | 0.966         | -1.196   | 0.24   | 6.57E-07     |               |          |        |              | 0.966          | -1.196    | 0.24    | 6.57E-07      | -?        |
| rs1501588   | 8   | 16640722   |           | A          | G                    | 0.069         | 0.683    | 0.202  | 7.42E-04     | 0.08          | 0.818    | 0.223  | 2.35E-04     | 0.074          | 0.744     | 0.15    | 6.69E-07      | ++        |
| rs118078748 | 11  | 29855828   |           | T          | C                    | 0.09          | 0.617    | 0.191  | 1.21E-03     | 0.088         | 0.813    | 0.215  | 1.50E-04     | 0.089          | 0.703     | 0.142   | 7.92E-07      | ++        |
| rs1483035   | 4   | 156510036  |           | A          | G                    | 0.403         | 0.428    | 0.121  | 4.29E-04     | 0.4           | 0.537    | 0.153  | 4.58E-04     | 0.402          | 0.47      | 0.095   | 7.95E-07      | ++        |
| rs11724400  | 4   | 156510748  |           | T          | C                    | 0.597         | -0.428   | 0.121  | 4.29E-04     | 0.6           | -0.537   | 0.153  | 4.58E-04     | 0.598          | -0.47     | 0.095   | 7.95E-07      | --        |
| rs2705447   | 4   | 156510320  |           | T          | C                    | 0.596         | -0.427   | 0.122  | 4.43E-04     | 0.6           | -0.537   | 0.153  | 4.58E-04     | 0.598          | -0.469    | 0.095   | 8.21E-07      | --        |
| rs2705464   | 4   | 156513652  |           | A          | G                    | 0.594         | -0.421   | 0.122  | 5.44E-04     | 0.6           | -0.536   | 0.153  | 4.69E-04     | 0.596          | -0.466    | 0.095   | 1.04E-06      | --        |
| rs1318278   | 8   | 16637512   |           | A          | G                    | 0.07          | 0.67     | 0.207  | 1.19E-03     | 0.08          | 0.811    | 0.221  | 2.49E-04     | 0.075          | 0.735     | 0.151   | 1.13E-06      | ++        |
| rs6816498   | 4   | 156506677  |           | T          | C                    | 0.405         | 0.43     | 0.122  | 4.43E-04     | 0.4           | 0.517    | 0.153  | 7.57E-04     | 0.403          | 0.464     | 0.096   | 1.26E-06      | ++        |
| rs4922233   | 8   | 16639069   |           | T          | C                    | 0.076         | 0.61     | 0.199  | 2.17E-03     | 0.088         | 0.809    | 0.214  | 1.53E-04     | 0.082          | 0.703     | 0.146   | 1.40E-06      | ++        |
| rs4681921   | 3   | 56904958   | ARHGEF3   | T          | C                    | 0.583         | -0.361   | 0.12   | 2.57E-03     | 0.598         | -0.593   | 0.151  | 8.34E-05     | 0.589          | -0.451    | 0.094   | 1.52E-06      | --        |
| rs35886876  | 3   | 56907017   | ARHGEF3   | A          | T                    | 0.419         | 0.362    | 0.12   | 2.56E-03     | 0.402         | 0.589    | 0.15   | 9.08E-05     | 0.412          | 0.45      | 0.094   | 1.60E-06      | ++        |
| rs73057290  | 3   | 35260436   |           | T          | C                    | 0.014         | 1.716    | 0.351  | 1.04E-06     | 0.014         | 0.68     | 0.521  | 1.92E-01     | 0.014          | 1.392     | 0.291   | 1.76E-06      | ++        |
| rs11030843  | 11  | 29868083   |           | T          | G                    | 0.09          | 0.584    | 0.194  | 2.60E-03     | 0.088         | 0.813    | 0.215  | 1.50E-04     | 0.089          | 0.687     | 0.144   | 1.78E-06      | ++        |
| rs11030844  | 11  | 29868278   |           | T          | C                    | 0.091         | 0.612    | 0.19   | 1.30E-03     | 0.089         | 0.765    | 0.216  | 3.94E-04     | 0.09           | 0.679     | 0.143   | 1.97E-06      | ++        |
| rs10567492  | 4   | 156485045  |           | A          | T                    | 0.406         | 0.44     | 0.122  | 3.10E-04     | 0.406         | 0.477    | 0.154  | 1.90E-03     | 0.406          | 0.454     | 0.096   | 1.98E-06      | ++        |
| rs73057274  | 3   | 35251812   |           | T          | C                    | 0.986         | -1.722   | 0.356  | 1.36E-06     | 0.986         | -0.68    | 0.521  | 1.92E-01     | 0.986          | -1.389    | 0.294   | 2.31E-06      | --        |
| rs2625274   | 4   | 156488140  |           | A          | T                    | 0.569         | -0.437   | 0.123  | 3.84E-04     | 0.575         | -0.475   | 0.154  | 2.05E-03     | 0.571          | -0.452    | 0.096   | 2.62E-06      | --        |
| rs567173013 | 4   | 156488055  |           | G          | TA<br>TT<br>GG<br>GT | 0.569         | -0.437   | 0.123  | 3.84E-04     | 0.574         | -0.473   | 0.154  | 2.13E-03     | 0.571          | -0.451    | 0.096   | 2.71E-06      | --        |
| rs73149268  | 3   | 25282624   | RARB      | T          | C                    | 0.01          | 1.71     | 0.365  | 2.75E-06     |               |          |        |              | 0.01           | 1.71      | 0.365   | 2.75E-06      | +?        |

|             |    |           |         |   |                                                   |       |        |       |          |       |        |       |          |       |        |       |          |    |
|-------------|----|-----------|---------|---|---------------------------------------------------|-------|--------|-------|----------|-------|--------|-------|----------|-------|--------|-------|----------|----|
| rs111940197 | 3  | 25283567  | RARB    | T | C                                                 | 0.99  | -1.71  | 0.365 | 2.75E-06 |       |        |       |          | 0.99  | -1.71  | 0.365 | 2.75E-06 | -? |
| rs140275615 | 3  | 25284679  | RARB    | T | C                                                 | 0.99  | -1.71  | 0.365 | 2.75E-06 |       |        |       |          | 0.99  | -1.71  | 0.365 | 2.75E-06 | -? |
| rs1843029   | 3  | 25288462  | RARB    | T | C                                                 | 0.99  | -1.71  | 0.365 | 2.75E-06 |       |        |       |          | 0.99  | -1.71  | 0.365 | 2.75E-06 | -? |
| rs113931895 | 3  | 25289172  | RARB    | T | C                                                 | 0.01  | 1.71   | 0.365 | 2.75E-06 |       |        |       |          | 0.01  | 1.71   | 0.365 | 2.75E-06 | +  |
| rs11030856  | 11 | 29886545  |         | A | G                                                 | 0.09  | 0.561  | 0.196 | 4.32E-03 | 0.087 | 0.818  | 0.214 | 1.36E-04 | 0.089 | 0.678  | 0.145 | 2.85E-06 | ++ |
| rs11030857  | 11 | 29886723  |         | A | G                                                 | 0.09  | 0.561  | 0.196 | 4.32E-03 | 0.087 | 0.818  | 0.214 | 1.36E-04 | 0.089 | 0.678  | 0.145 | 2.85E-06 | ++ |
| rs78923500  | 3  | 25289791  | RARB    | A | G                                                 | 0.011 | 1.687  | 0.361 | 3.05E-06 |       |        |       |          | 0.011 | 1.687  | 0.361 | 3.05E-06 | +  |
| rs145836613 | 3  | 25291057  | RARB    | A | AT                                                | 0.989 | -1.687 | 0.361 | 3.05E-06 |       |        |       |          | 0.989 | -1.687 | 0.361 | 3.05E-06 | -? |
| rs73151265  | 3  | 25294450  | RARB    | A | G                                                 | 0.011 | 1.687  | 0.361 | 3.05E-06 |       |        |       |          | 0.011 | 1.687  | 0.361 | 3.05E-06 | +  |
| rs2254177   | 17 | 48358419  | TMEM92  | A | G                                                 | 0.311 | 0.623  | 0.134 | 3.08E-06 |       |        |       |          | 0.311 | 0.623  | 0.134 | 3.08E-06 | +  |
| rs72878918  | 11 | 29869921  |         | A | G                                                 | 0.898 | -0.577 | 0.184 | 1.73E-03 | 0.902 | -0.742 | 0.212 | 4.76E-04 | 0.899 | -0.648 | 0.139 | 3.21E-06 | -- |
| rs4922234   | 8  | 16639271  |         | C | G                                                 | 0.924 | -0.605 | 0.199 | 2.36E-03 | 0.915 | -0.776 | 0.22  | 4.16E-04 | 0.92  | -0.682 | 0.147 | 3.78E-06 | -- |
| rs2254318   | 17 | 48359928  |         | C | G                                                 | 0.314 | 0.617  | 0.134 | 4.16E-06 |       |        |       |          | 0.314 | 0.617  | 0.134 | 4.16E-06 | +  |
| rs2586437   | 17 | 48360903  |         | T | C                                                 | 0.317 | 0.607  | 0.133 | 4.72E-06 |       |        |       |          | 0.317 | 0.607  | 0.133 | 4.72E-06 | +  |
| rs80067087  | 14 | 95508157  |         | T | C                                                 | 0.972 | -1.209 | 0.264 | 4.75E-06 |       |        |       |          | 0.972 | -1.209 | 0.264 | 4.75E-06 | -? |
| rs1466516   | 4  | 156517289 |         | T | C                                                 | 0.608 | -0.422 | 0.126 | 8.00E-04 | 0.604 | -0.476 | 0.152 | 1.78E-03 | 0.607 | -0.444 | 0.097 | 4.76E-06 | -- |
| rs2705469   | 4  | 156515772 |         | T | C                                                 | 0.608 | -0.421 | 0.126 | 8.17E-04 | 0.605 | -0.477 | 0.152 | 1.74E-03 | 0.607 | -0.444 | 0.097 | 4.77E-06 | -- |
| rs72878951  | 11 | 29899326  |         | A | G                                                 | 0.901 | -0.563 | 0.189 | 2.93E-03 | 0.903 | -0.752 | 0.213 | 4.12E-04 | 0.902 | -0.646 | 0.141 | 4.87E-06 | -- |
| rs728230    | 17 | 48359421  |         | A | G<br>TG<br>CC<br>CT<br>AA<br>TT<br>GA<br>TG<br>AA | 0.311 | 0.609  | 0.134 | 5.35E-06 |       |        |       |          | 0.311 | 0.609  | 0.134 | 5.35E-06 | +  |
| rs149927205 | 2  | 213240755 | ERBB4   | T | AA                                                | 0.05  | 0.488  | 0.247 | 4.78E-02 | 0.048 | 1.115  | 0.249 | 7.84E-06 | 0.049 | 0.798  | 0.175 | 5.37E-06 | ++ |
| rs10501116  | 11 | 29880030  |         | A | T                                                 | 0.894 | -0.573 | 0.179 | 1.34E-03 | 0.903 | -0.697 | 0.214 | 1.14E-03 | 0.898 | -0.624 | 0.137 | 5.43E-06 | -- |
| rs11529247  | 11 | 29852312  |         | A | G                                                 | 0.088 | 0.541  | 0.192 | 4.73E-03 | 0.089 | 0.786  | 0.215 | 2.53E-04 | 0.088 | 0.65   | 0.143 | 5.54E-06 | ++ |
| rs72878978  | 11 | 29917439  |         | A | C                                                 | 0.106 | 0.537  | 0.18  | 2.87E-03 | 0.098 | 0.735  | 0.212 | 5.37E-04 | 0.103 | 0.62   | 0.137 | 6.40E-06 | ++ |
| rs12420770  | 11 | 29890495  |         | A | C                                                 | 0.107 | 0.541  | 0.18  | 2.65E-03 | 0.098 | 0.729  | 0.212 | 5.99E-04 | 0.103 | 0.62   | 0.137 | 6.42E-06 | ++ |
| rs3122707   | 9  | 15588214  | CCDC171 | C | G                                                 | 0.905 | -0.804 | 0.179 | 6.88E-06 |       |        |       |          | 0.905 | -0.804 | 0.179 | 6.88E-06 | -? |



|             |    |           |         |     |          |       |        |       |          |       |        |       |          |       |        |       |          |   |   |
|-------------|----|-----------|---------|-----|----------|-------|--------|-------|----------|-------|--------|-------|----------|-------|--------|-------|----------|---|---|
| rs201800106 | 2  | 748110    |         | T   | C        | 0.614 | 0.599  | 0.134 | 7.11E-06 |       |        |       |          | 0.614 | 0.6    | 0.134 | 7.11E-06 | + | ? |
| rs11161210  | 15 | 25969509  | ATP10A  | A   | T        | 0.023 | 1.228  | 0.273 | 7.12E-06 |       |        |       |          | 0.023 | 1.228  | 0.273 | 7.12E-06 | + | ? |
| rs187562906 | 6  | 71985782  |         | T   | C        | 0.011 | 1.742  | 0.388 | 7.14E-06 |       |        |       |          | 0.011 | 1.742  | 0.388 | 7.14E-06 | + | ? |
| rs3122706   | 9  | 15588885  | CCDC171 | T   | G        | 0.905 | -0.796 | 0.177 | 7.18E-06 |       |        |       |          | 0.905 | -0.796 | 0.177 | 7.18E-06 | - | ? |
| rs72878920  | 11 | 29870591  |         | A   | G        | 0.883 | -0.544 | 0.172 | 1.60E-03 | 0.894 | -0.68  | 0.211 | 1.27E-03 | 0.887 | -0.599 | 0.134 | 7.38E-06 | - | - |
| rs4355814   | 8  | 16642227  |         | C   | G        | 0.913 | -0.581 | 0.184 | 1.60E-03 | 0.909 | -0.689 | 0.216 | 1.42E-03 | 0.911 | -0.626 | 0.14  | 7.75E-06 | - | - |
| rs2251405   | 1  | 114697134 |         | A   | G        | 0.763 | 0.721  | 0.171 | 2.39E-05 | 0.764 | 0.38   | 0.192 | 4.80E-02 | 0.764 | 0.571  | 0.128 | 7.77E-06 | + | + |
| rs11525343  | 11 | 29854157  |         | T   | C        | 0.089 | 0.521  | 0.192 | 6.59E-03 | 0.089 | 0.786  | 0.215 | 2.53E-04 | 0.089 | 0.639  | 0.143 | 8.06E-06 | + | + |
| rs62426129  | 6  | 149269199 | UST     | T   | C        | 0.196 | -0.62  | 0.188 | 9.76E-04 | 0.168 | -0.788 | 0.258 | 2.30E-03 | 0.186 | -0.678 | 0.152 | 8.19E-06 | - | - |
| rs62426130  | 6  | 149269662 | UST     | T   | G        | 0.804 | 0.62   | 0.188 | 9.76E-04 | 0.832 | 0.788  | 0.258 | 2.30E-03 | 0.814 | 0.678  | 0.152 | 8.19E-06 | + | + |
| rs12918906  | 16 | 19889658  | GPRC5B  | T   | C        | 0.059 | 0.92   | 0.206 | 8.22E-06 |       |        |       |          | 0.059 | 0.92   | 0.206 | 8.22E-06 | + | ? |
| rs7611431   | 3  | 56910091  | ARHGEF3 | A   | G        | 0.559 | -0.32  | 0.122 | 8.55E-03 | 0.573 | -0.582 | 0.152 | 1.24E-04 | 0.564 | -0.423 | 0.095 | 8.46E-06 | - | - |
| rs11030848  | 11 | 29877687  |         | T   | C        | 0.108 | 0.552  | 0.179 | 2.03E-03 | 0.097 | 0.695  | 0.214 | 1.16E-03 | 0.103 | 0.611  | 0.137 | 8.59E-06 | + | + |
| rs247396    | 16 | 83814397  | CDH13   | C   | G        | 0.239 | 0.351  | 0.148 | 1.75E-02 | 0.246 | 0.604  | 0.153 | 7.93E-05 | 0.242 | 0.473  | 0.106 | 8.62E-06 | + | + |
| rs1364115   | 16 | 83815052  | CDH13   | C   | G        | 0.233 | 0.347  | 0.149 | 1.99E-02 | 0.238 | 0.619  | 0.155 | 6.76E-05 | 0.236 | 0.477  | 0.107 | 9.04E-06 | + | + |
| rs10835592  | 11 | 29848290  |         | A   | T        | 0.911 | -0.485 | 0.195 | 1.29E-02 | 0.913 | -0.836 | 0.216 | 1.10E-04 | 0.912 | -0.643 | 0.145 | 9.09E-06 | - | - |
| rs72876999  | 11 | 29848888  |         | T   | C        | 0.089 | 0.485  | 0.195 | 1.29E-02 | 0.087 | 0.836  | 0.216 | 1.10E-04 | 0.088 | 0.643  | 0.145 | 9.09E-06 | + | + |
| rs59970673  | 15 | 45378884  |         | A   | G        | 0.01  | 1.862  | 0.42  | 9.21E-06 |       |        |       |          | 0.01  | 1.862  | 0.42  | 9.21E-06 | + | ? |
| rs1981860   | 16 | 83813294  | CDH13   | T   | C        | 0.767 | -0.347 | 0.149 | 1.99E-02 | 0.761 | -0.618 | 0.155 | 6.94E-05 | 0.764 | -0.477 | 0.108 | 9.24E-06 | - | - |
| rs57930285  | 16 | 83813511  | CDH13   | A   | G        | 0.233 | 0.347  | 0.149 | 1.99E-02 | 0.239 | 0.618  | 0.155 | 6.94E-05 | 0.236 | 0.477  | 0.108 | 9.24E-06 | + | + |
| rs143088710 | 2  | 52866377  |         | T   | C        | 0.02  | 1.022  | 0.33  | 1.96E-03 | 0.016 | 1.321  | 0.411 | 1.30E-03 | 0.018 | 1.139  | 0.257 | 9.50E-06 | + | + |
| rs5790769   | 11 | 29884200  |         | T   | TA<br>TT | 0.909 | -0.551 | 0.196 | 5.03E-03 | 0.911 | -0.764 | 0.218 | 4.63E-04 | 0.91  | -0.646 | 0.146 | 9.56E-06 | - | - |
| 11:29896975 | 11 | 29896975  |         | CTT | T        | 0.892 | -0.529 | 0.178 | 3.04E-03 | 0.901 | -0.713 | 0.212 | 7.96E-04 | 0.896 | -0.605 | 0.137 | 9.59E-06 | - | - |
| rs10501120  | 11 | 29897097  |         | A   | G        | 0.108 | 0.529  | 0.178 | 3.04E-03 | 0.099 | 0.713  | 0.212 | 7.96E-04 | 0.104 | 0.605  | 0.137 | 9.59E-06 | + | + |
| rs11134266  | 5  | 7945144   |         | T   | C<br>GA  | 0.955 | -0.423 | 0.286 | 1.39E-01 | 0.954 | -1.239 | 0.266 | 3.13E-06 | 0.955 | -0.86  | 0.195 | 9.83E-06 | - | - |
| rs151051496 | 5  | 7948743   |         | G   | T        | 0.045 | 0.423  | 0.286 | 1.39E-01 | 0.046 | 1.239  | 0.266 | 3.13E-06 | 0.045 | 0.86   | 0.195 | 9.83E-06 | + | + |
| rs11744470  | 5  | 7952808   |         | A   | G        | 0.955 | -0.423 | 0.286 | 1.39E-01 | 0.954 | -1.239 | 0.266 | 3.13E-06 | 0.955 | -0.86  | 0.195 | 9.83E-06 | - | - |
| rs4140764   | 12 | 13952222  | GRIN2B  | C   | G        | 0.733 | -0.404 | 0.136 | 2.89E-03 | 0.737 | -0.559 | 0.167 | 8.33E-04 | 0.734 | -0.465 | 0.105 | 9.91E-06 | - | - |

|             |    |           |         |                        |               |       |        |       |          |       |        |       |          |       |        |       |          |    |
|-------------|----|-----------|---------|------------------------|---------------|-------|--------|-------|----------|-------|--------|-------|----------|-------|--------|-------|----------|----|
| rs13081102  | 3  | 56910738  | ARHGEF3 | T                      | C             | 0.561 | -0.318 | 0.121 | 8.61E-03 | 0.579 | -0.576 | 0.152 | 1.55E-04 | 0.568 | -0.418 | 0.095 | 1.03E-05 | -- |
| rs138053245 | 9  | 120221686 |         | G                      | GA            | 0.972 | -0.974 | 0.296 | 1.01E-03 | 0.974 | -0.953 | 0.325 | 3.40E-03 | 0.973 | -0.964 | 0.219 | 1.07E-05 | -- |
| rs114807580 | 12 | 20150910  |         | T                      | C             | 0.985 | -1.52  | 0.345 | 1.07E-05 |       |        |       |          | 0.985 | -1.52  | 0.345 | 1.07E-05 | -? |
| rs9495493   | 6  | 139802437 |         | T                      | C             | 0.058 | 0.933  | 0.212 | 1.07E-05 |       |        |       |          | 0.058 | 0.933  | 0.212 | 1.07E-05 | +? |
| rs12211515  | 6  | 149271813 | UST     | T                      | C             | 0.803 | 0.631  | 0.188 | 8.12E-04 | 0.832 | 0.722  | 0.252 | 4.19E-03 | 0.813 | 0.664  | 0.151 | 1.10E-05 | ++ |
| rs6775150   | 3  | 56906056  | ARHGEF3 | C                      | G             | 0.435 | 0.3    | 0.12  | 1.26E-02 | 0.424 | 0.599  | 0.152 | 8.35E-05 | 0.431 | 0.415  | 0.094 | 1.10E-05 | ++ |
| rs4681924   | 3  | 56906396  | ARHGEF3 | T                      | C             | 0.564 | -0.308 | 0.121 | 1.10E-02 | 0.576 | -0.587 | 0.152 | 1.12E-04 | 0.569 | -0.416 | 0.095 | 1.11E-05 | -- |
| rs12222131  | 11 | 29931436  |         | A                      | G             | 0.107 | 0.598  | 0.182 | 1.02E-03 | 0.097 | 0.631  | 0.216 | 3.52E-03 | 0.103 | 0.612  | 0.139 | 1.12E-05 | ++ |
| rs116912917 | 20 | 43660394  | STK4    | A                      | G             | 0.917 | -0.83  | 0.189 | 1.13E-05 |       |        |       |          | 0.917 | -0.83  | 0.189 | 1.13E-05 | -? |
| rs1403418   | 3  | 189804656 | LEPREL1 | A                      | G             |       |        |       |          | 0.99  | -2.121 | 0.483 | 1.14E-05 | 0.99  | -2.121 | 0.483 | 1.14E-05 | ?- |
| rs926757    | 22 | 45497187  |         | A                      | G<br>TA<br>AA | 0.112 | 0.415  | 0.172 | 1.55E-02 | 0.119 | 0.738  | 0.191 | 1.10E-04 | 0.115 | 0.56   | 0.128 | 1.15E-05 | ++ |
| rs5820809   | 17 | 48360270  |         | T                      | C             | 0.348 | 0.576  | 0.131 | 1.16E-05 |       |        |       |          | 0.348 | 0.576  | 0.131 | 1.16E-05 | +? |
| rs11030840  | 11 | 29862369  |         | C                      | G             | 0.883 | -0.541 | 0.174 | 1.90E-03 | 0.894 | -0.66  | 0.211 | 1.77E-03 | 0.887 | -0.589 | 0.134 | 1.16E-05 | -- |
| rs10501119  | 11 | 29896698  |         | T                      | C             | 0.884 | -0.542 | 0.173 | 1.75E-03 | 0.892 | -0.654 | 0.211 | 1.97E-03 | 0.888 | -0.587 | 0.134 | 1.17E-05 | -- |
| rs16920003  | 11 | 29937234  |         | C                      | G             | 0.115 | 0.606  | 0.177 | 6.04E-04 | 0.105 | 0.584  | 0.215 | 6.46E-03 | 0.111 | 0.598  | 0.136 | 1.19E-05 | ++ |
| rs11130551  | 3  | 56906636  | ARHGEF3 | T                      | C             | 0.563 | -0.305 | 0.121 | 1.19E-02 | 0.573 | -0.588 | 0.152 | 1.11E-04 | 0.567 | -0.415 | 0.095 | 1.21E-05 | -- |
| rs45501291  | 7  | 87029710  |         | A                      | G             | 0.942 | -0.672 | 0.226 | 2.99E-03 | 0.947 | -0.857 | 0.264 | 1.17E-03 | 0.944 | -0.75  | 0.172 | 1.26E-05 | -- |
| rs453991    | 9  | 15600548  | CCDC171 | A                      | G             | 0.086 | 0.804  | 0.184 | 1.27E-05 |       |        |       |          | 0.086 | 0.804  | 0.184 | 1.27E-05 | +? |
| rs11030863  | 11 | 29910585  |         | T<br>CGT<br>GCG<br>CTG | C             | 0.88  | -0.564 | 0.17  | 8.93E-04 | 0.887 | -0.591 | 0.209 | 4.69E-03 | 0.883 | -0.575 | 0.132 | 1.29E-05 | -- |
| rs56090907  | 16 | 68401338  | SMPD3   | CT                     | C             | 0.35  | 0.578  | 0.133 | 1.47E-05 | 0.346 | 0.256  | 0.155 | 9.86E-02 | 0.348 | 0.441  | 0.101 | 1.29E-05 | ++ |
| rs11030862  | 11 | 29897704  |         | C                      | G             | 0.115 | 0.552  | 0.173 | 1.46E-03 | 0.106 | 0.635  | 0.213 | 2.84E-03 | 0.112 | 0.585  | 0.134 | 1.34E-05 | ++ |
| rs12469774  | 2  | 213259502 | ERBB4   | T                      | C             | 0.952 | -0.576 | 0.241 | 1.70E-02 | 0.955 | -1.007 | 0.263 | 1.27E-04 | 0.953 | -0.773 | 0.178 | 1.36E-05 | -- |
| rs149574734 | 8  | 2851416   | CSMD1   | T                      | C             | 0.019 | 1.46   | 0.336 | 1.42E-05 |       |        |       |          | 0.019 | 1.46   | 0.336 | 1.42E-05 | +? |
| rs55669429  | 3  | 63995599  |         | A                      | G             | 0.912 | -0.638 | 0.186 | 5.89E-04 | 0.907 | -0.577 | 0.218 | 8.00E-03 | 0.91  | -0.612 | 0.141 | 1.45E-05 | -- |
| rs7008098   | 8  | 141287438 | TRAPPC9 | A                      | T             | 0.336 | 0.382  | 0.125 | 2.16E-03 | 0.323 | 0.481  | 0.155 | 1.95E-03 | 0.331 | 0.421  | 0.097 | 1.48E-05 | ++ |
| rs115263587 | 5  | 99707048  |         | T                      | C             | 0.986 | -1.565 | 0.361 | 1.49E-05 |       |        |       |          | 0.986 | -1.565 | 0.361 | 1.49E-05 | -? |
| rs139706388 | 10 | 125228664 |         | T                      | TA            | 0.09  | 0.525  | 0.189 | 5.48E-03 | 0.085 | 0.763  | 0.223 | 6.25E-04 | 0.088 | 0.624  | 0.144 | 1.49E-05 | ++ |

|             |    |           |        |   |    |       |        |       |          |       |        |       |          |       |        |       |          |    |
|-------------|----|-----------|--------|---|----|-------|--------|-------|----------|-------|--------|-------|----------|-------|--------|-------|----------|----|
| rs34768432  | 14 | 30785974  |        | T | C  | 0.933 | -0.925 | 0.214 | 1.53E-05 |       |        |       |          | 0.933 | -0.925 | 0.214 | 1.53E-05 | -? |
| rs62426127  | 6  | 149259898 | UST    | A | G  | 0.819 | 0.61   | 0.191 | 1.39E-03 | 0.836 | 0.766  | 0.259 | 3.16E-03 | 0.825 | 0.665  | 0.154 | 1.53E-05 | ++ |
| rs62426128  | 6  | 149260017 | UST    | T | C  | 0.819 | 0.61   | 0.191 | 1.39E-03 | 0.836 | 0.766  | 0.259 | 3.16E-03 | 0.825 | 0.665  | 0.154 | 1.53E-05 | ++ |
| rs181885805 | 10 | 125228663 |        | A | C  | 0.092 | 0.504  | 0.189 | 7.77E-03 | 0.084 | 0.81   | 0.228 | 3.69E-04 | 0.089 | 0.629  | 0.145 | 1.53E-05 | ++ |
| rs16919890  | 11 | 29865389  |        | C | G  | 0.894 | -0.565 | 0.179 | 1.57E-03 | 0.901 | -0.637 | 0.215 | 3.09E-03 | 0.897 | -0.594 | 0.138 | 1.55E-05 | -- |
| rs397874352 | 3  | 177420306 |        | A | AT | 0.177 | 0.656  | 0.147 | 8.24E-06 | 0.178 | 0.247  | 0.188 | 1.89E-01 | 0.177 | 0.501  | 0.116 | 1.55E-05 | ++ |
| rs9390640   | 6  | 149254024 | UST    | A | C  | 0.366 | -0.565 | 0.139 | 4.89E-05 | 0.367 | -0.313 | 0.166 | 6.01E-02 | 0.367 | -0.461 | 0.107 | 1.55E-05 | -- |
| rs17080218  | 6  | 149258535 | UST    | T | C  | 0.18  | -0.598 | 0.19  | 1.66E-03 | 0.163 | -0.798 | 0.264 | 2.48E-03 | 0.174 | -0.667 | 0.154 | 1.56E-05 | -- |
| rs144056943 | 7  | 86335993  | GRM3   | A | G  | 0.032 | 0.904  | 0.286 | 1.59E-03 | 0.03  | 0.996  | 0.337 | 3.15E-03 | 0.031 | 0.942  | 0.218 | 1.58E-05 | ++ |
| rs79367729  | 12 | 49353087  |        | T | TC | 0.384 | 0.401  | 0.126 | 1.47E-03 | 0.39  | 0.439  | 0.15  | 3.46E-03 | 0.387 | 0.417  | 0.097 | 1.59E-05 | ++ |
| rs9645813   | 12 | 49353138  |        | C | G  | 0.384 | 0.401  | 0.126 | 1.47E-03 | 0.39  | 0.439  | 0.15  | 3.46E-03 | 0.387 | 0.417  | 0.097 | 1.59E-05 | ++ |
| rs61942207  | 12 | 49353601  |        | T | C  | 0.616 | -0.401 | 0.126 | 1.47E-03 | 0.61  | -0.439 | 0.15  | 3.46E-03 | 0.613 | -0.417 | 0.097 | 1.59E-05 | -- |
| rs4760664   | 12 | 49354484  |        | A | G  | 0.616 | -0.401 | 0.126 | 1.47E-03 | 0.61  | -0.439 | 0.15  | 3.46E-03 | 0.613 | -0.417 | 0.097 | 1.59E-05 | -- |
| rs139355322 | 5  | 99770257  |        | A | T  | 0.012 | 1.641  | 0.38  | 1.61E-05 |       |        |       |          | 0.012 | 1.641  | 0.38  | 1.61E-05 | +? |
| rs141420537 | 19 | 33323510  | SLC7A9 | A | AG | 0.231 | 0.217  | 0.143 | 1.31E-01 | 0.239 | 0.831  | 0.17  | 9.88E-07 | 0.235 | 0.472  | 0.11  | 1.62E-05 | ++ |
| rs141924696 | 7  | 7602244   |        | T | C  | 0.989 | -1.623 | 0.376 | 1.62E-05 |       |        |       |          | 0.989 | -1.623 | 0.376 | 1.62E-05 | -? |
| rs10875902  | 12 | 49355292  |        | A | G  | 0.384 | 0.401  | 0.126 | 1.47E-03 | 0.39  | 0.438  | 0.15  | 3.54E-03 | 0.387 | 0.416  | 0.097 | 1.63E-05 | ++ |
| rs72878968  | 11 | 29910502  |        | A | G  | 0.882 | -0.515 | 0.174 | 3.00E-03 | 0.893 | -0.671 | 0.211 | 1.48E-03 | 0.886 | -0.578 | 0.134 | 1.63E-05 | -- |
| rs11919260  | 3  | 1086918   |        | A | G  | 0.473 | 0.556  | 0.129 | 1.65E-05 |       |        |       |          | 0.473 | 0.556  | 0.129 | 1.65E-05 | +? |
| rs190534068 | 2  | 213223091 | ERBB4  | A | T  | 0.95  | -0.469 | 0.247 | 5.79E-02 | 0.952 | -1.063 | 0.252 | 2.47E-05 | 0.951 | -0.76  | 0.176 | 1.65E-05 | -- |
| rs75711731  | 11 | 29926303  |        | T | C  | 0.884 | -0.544 | 0.176 | 2.00E-03 | 0.894 | -0.641 | 0.213 | 2.57E-03 | 0.888 | -0.584 | 0.136 | 1.68E-05 | -- |
| rs2561074   | 5  | 65640352  |        | A | G  | 0.606 | -0.547 | 0.127 | 1.71E-05 |       |        |       |          | 0.607 | -0.547 | 0.127 | 1.71E-05 | -? |
| rs2801646   | 5  | 65640456  |        | A | G  | 0.606 | -0.547 | 0.127 | 1.71E-05 |       |        |       |          | 0.607 | -0.547 | 0.127 | 1.71E-05 | -? |
| rs10512246  | 9  | 98426095  |        | C | G  |       |        |       |          | 0.01  | 1.969  | 0.458 | 1.73E-05 | 0.01  | 1.969  | 0.458 | 1.73E-05 | ?+ |
| rs9521369   | 13 | 110082687 |        | A | G  | 0.148 | 0.626  | 0.161 | 1.04E-04 | 0.15  | 0.385  | 0.185 | 3.67E-02 | 0.149 | 0.522  | 0.121 | 1.73E-05 | ++ |
| rs12513726  | 5  | 177414179 |        | T | C  | 0.264 | 0.366  | 0.14  | 9.06E-03 | 0.269 | 0.546  | 0.155 | 4.38E-04 | 0.267 | 0.446  | 0.104 | 1.76E-05 | ++ |
| rs2307022   | 16 | 68381978  | PRMT7  | A | G  | 0.345 | 0.549  | 0.134 | 3.97E-05 | 0.343 | 0.279  | 0.154 | 7.02E-02 | 0.344 | 0.433  | 0.101 | 1.78E-05 | ++ |
| rs73196422  | 7  | 87007744  | CROT   | T | C  | 0.942 | -0.682 | 0.225 | 2.40E-03 | 0.946 | -0.823 | 0.269 | 2.23E-03 | 0.944 | -0.74  | 0.172 | 1.79E-05 | -- |

|             |    |           |        |   |    |       |        |       |          |       |         |             |          |       |        |       |          |    |
|-------------|----|-----------|--------|---|----|-------|--------|-------|----------|-------|---------|-------------|----------|-------|--------|-------|----------|----|
| rs73196425  | 7  | 87008223  | CROT   | T | C  | 0.058 | 0.682  | 0.225 | 2.40E-03 | 0.054 | 0.823   | 0.269       | 2.23E-03 | 0.056 | 0.74   | 0.172 | 1.79E-05 | ++ |
| rs117503563 | 8  | 26815709  |        | A | G  | 0.024 | 0.93   | 0.307 | 2.43E-03 | 0.016 | 1.245   | 0.402       | 1.96E-03 | 0.021 | 1.046  | 0.244 | 1.80E-05 | ++ |
| rs79413760  | 9  | 79156095  |        | T | C  | 0.011 | 1.578  | 0.368 | 1.81E-05 |       |         |             |          | 0.011 | 1.578  | 0.368 | 1.81E-05 | +? |
| rs4696883   | 4  | 8644223   |        | A | G  | 0.271 | 0.578  | 0.135 | 1.82E-05 |       |         |             |          | 0.271 | 0.578  | 0.135 | 1.82E-05 | +? |
| rs3782353   | 12 | 49358880  |        | A | G  | 0.384 | 0.402  | 0.126 | 1.41E-03 | 0.391 | 0.428   | 0.15        | 4.19E-03 | 0.387 | 0.413  | 0.096 | 1.82E-05 | ++ |
| rs549799093 | 11 | 29921526  |        | T | TA | 0.134 | 0.542  | 0.164 | 9.75E-04 | 0.122 | 0.558   | 0.204       | 6.23E-03 | 0.129 | 0.548  | 0.128 | 1.83E-05 | ++ |
| rs78527272  | 13 | 110022728 |        | A | G  | 0.105 | 0.582  | 0.182 | 1.37E-03 | 0.103 | 0.593   | 0.208       | 4.41E-03 | 0.104 | 0.587  | 0.137 | 1.84E-05 | ++ |
| rs4760662   | 12 | 49370857  |        | A | G  | 0.387 | 0.393  | 0.125 | 1.66E-03 | 0.395 | 0.438   | 0.15        | 3.55E-03 | 0.39  | 0.411  | 0.096 | 1.85E-05 | ++ |
| rs12069698  | 1  | 97352212  |        | C | G  | 0.95  | -0.972 | 0.233 | 3.02E-05 | 0.951 | -0.484  | 0.302       | 1.09E-01 | 0.951 | -0.79  | 0.184 | 1.86E-05 | -- |
| rs3741627   | 12 | 49359587  | WNT10B | T | G  | 0.616 | -0.402 | 0.126 | 1.41E-03 | 0.608 | -0.427  | 0.15        | 4.33E-03 | 0.613 | -0.412 | 0.096 | 1.87E-05 | -- |
| rs1051886   | 12 | 49359989  | WNT10B | A | G  | 0.384 | 0.402  | 0.126 | 1.41E-03 | 0.392 | 0.427   | 0.15        | 4.33E-03 | 0.387 | 0.412  | 0.096 | 1.87E-05 | ++ |
| rs73060918  | 3  | 35400750  |        | A | C  | 0.983 | -1.383 | 0.351 | 8.07E-05 | 0.986 | -0.892  | 0.485       | 6.57E-02 | 0.984 | -1.214 | 0.284 | 1.93E-05 | -- |
| rs73196416  | 7  | 87006287  | CROT   | A | G  | 0.942 | -0.682 | 0.225 | 2.40E-03 | 0.946 | -0.816  | 0.269       | 2.44E-03 | 0.943 | -0.737 | 0.172 | 1.93E-05 | -- |
| rs2031277   | 13 | 31200712  | USPL1  | T | G  | 0.984 | -1.494 | 0.35  | 1.94E-05 |       |         |             |          | 0.984 | -1.494 | 0.35  | 1.94E-05 | -? |
| rs60267144  | 13 | 31202445  | USPL1  | A | G  | 0.984 | -1.494 | 0.35  | 1.94E-05 |       |         |             |          | 0.984 | -1.494 | 0.35  | 1.94E-05 | -? |
| rs11839042  | 13 | 31207246  | USPL1  | T | G  | 0.016 | 1.494  | 0.35  | 1.94E-05 |       |         |             |          | 0.016 | 1.494  | 0.35  | 1.94E-05 | +? |
| rs11841258  | 13 | 31221745  | USPL1  | A | G  | 0.984 | -1.494 | 0.35  | 1.94E-05 |       |         |             |          | 0.984 | -1.494 | 0.35  | 1.94E-05 | -? |
| rs11838483  | 13 | 31221768  | USPL1  | C | G  | 0.984 | -1.494 | 0.35  | 1.94E-05 |       |         |             |          | 0.984 | -1.494 | 0.35  | 1.94E-05 | -? |
| rs140813066 | 13 | 31229326  | USPL1  | A | G  | 0.016 | 1.494  | 0.35  | 1.94E-05 |       |         |             |          | 0.016 | 1.494  | 0.35  | 1.94E-05 | +? |
| rs78450603  | 9  | 137521989 |        | A | G  | 0.987 | -1.572 | 0.368 | 1.94E-05 |       |         |             |          | 0.987 | -1.572 | 0.368 | 1.94E-05 | -? |
| rs114344631 | 1  | 97373175  |        | A | G  | 0.047 | 1.013  | 0.237 | 1.96E-05 |       |         |             |          | 0.047 | 1.012  | 0.237 | 1.96E-05 | +? |
| rs7740363   | 6  | 149253509 | UST    | A | T  | 0.366 | -0.566 | 0.139 | 4.52E-05 | 0.369 | -0.295  | 0.166       | 7.54E-02 | 0.367 | -0.454 | 0.106 | 1.97E-05 | -- |
| rs182034520 | 4  | 106309665 | PPA2   | T | C  | 0.018 | 1.511  | 0.354 | 2.00E-05 | 0.014 | -15.048 | 683.82<br>5 | 9.82E-01 | 0.018 | 1.511  | 0.354 | 2.00E-05 | +- |
| rs9377179   | 6  | 149252699 | UST    | A | T  | 0.366 | -0.566 | 0.139 | 4.52E-05 | 0.369 | -0.293  | 0.165       | 7.60E-02 | 0.367 | -0.453 | 0.106 | 2.01E-05 | -- |
| rs9390639   | 6  | 149252978 | UST    | C | G  | 0.634 | 0.566  | 0.139 | 4.52E-05 | 0.631 | 0.293   | 0.166       | 7.65E-02 | 0.633 | 0.454  | 0.106 | 2.01E-05 | ++ |
| rs6792738   | 3  | 1080996   |        | A | G  | 0.55  | -0.552 | 0.129 | 2.01E-05 |       |         |             |          | 0.55  | -0.552 | 0.13  | 2.01E-05 | -? |
| rs4760663   | 12 | 49368633  |        | A | G  | 0.387 | 0.389  | 0.125 | 1.86E-03 | 0.395 | 0.438   | 0.15        | 3.55E-03 | 0.39  | 0.409  | 0.096 | 2.08E-05 | ++ |
| rs9377178   | 6  | 149252604 | UST    | T | C  | 0.366 | -0.566 | 0.139 | 4.52E-05 | 0.368 | -0.291  | 0.165       | 7.88E-02 | 0.367 | -0.453 | 0.106 | 2.10E-05 | -- |

|             |    |           |               |                   |    |       |        |       |          |       |        |       |          |       |        |       |          |    |
|-------------|----|-----------|---------------|-------------------|----|-------|--------|-------|----------|-------|--------|-------|----------|-------|--------|-------|----------|----|
| rs184158151 | 5  | 4779708   |               | T                 | G  | 0.02  | 1.374  | 0.323 | 2.10E-05 |       |        |       |          | 0.02  | 1.374  | 0.323 | 2.10E-05 | +? |
| rs145281604 | 6  | 70945711  | COL9A1        | A                 | G  | 0.029 | 1.175  | 0.276 | 2.11E-05 |       |        |       |          | 0.029 | 1.175  | 0.276 | 2.11E-05 | +? |
| rs1026900   | 6  | 149246525 | UST           | T                 | C  | 0.368 | -0.569 | 0.138 | 3.79E-05 | 0.367 | -0.28  | 0.164 | 8.87E-02 | 0.367 | -0.449 | 0.106 | 2.14E-05 | -- |
| rs72876992  | 11 | 29845123  |               | T                 | C  | 0.103 | 0.489  | 0.179 | 6.32E-03 | 0.095 | 0.714  | 0.213 | 7.94E-04 | 0.1   | 0.582  | 0.137 | 2.15E-05 | ++ |
| rs79104029  | 2  | 80901525  |               | T                 | G  | 0.972 | -1.169 | 0.275 | 2.15E-05 |       |        |       |          | 0.973 | -1.169 | 0.275 | 2.15E-05 | -? |
| rs143943848 | 5  | 99811021  |               | T                 | C  | 0.99  | -1.752 | 0.413 | 2.16E-05 |       |        |       |          | 0.99  | -1.752 | 0.413 | 2.16E-05 | -? |
| rs149593616 | 5  | 99833127  |               | A                 | T  | 0.01  | 1.752  | 0.413 | 2.16E-05 |       |        |       |          | 0.01  | 1.752  | 0.413 | 2.16E-05 | +? |
| rs146453521 | 6  | 70807017  | COL19A1       | T                 | G  | 0.975 | -1.235 | 0.291 | 2.19E-05 |       |        |       |          | 0.975 | -1.235 | 0.291 | 2.19E-05 | -? |
| rs4376480   | 8  | 141282972 | TRAPPC9       | A                 | C  | 0.289 | 0.367  | 0.133 | 5.70E-03 | 0.291 | 0.518  | 0.157 | 9.62E-04 | 0.29  | 0.43   | 0.101 | 2.20E-05 | ++ |
| rs114111786 | 4  | 106394997 | PPA2          | T                 | C  | 0.018 | 1.497  | 0.353 | 2.21E-05 |       |        |       |          | 0.018 | 1.497  | 0.353 | 2.21E-05 | +? |
| rs144183314 | 4  | 106407068 |               | C                 | G  | 0.018 | 1.497  | 0.353 | 2.21E-05 |       |        |       |          | 0.018 | 1.497  | 0.353 | 2.21E-05 | +? |
| rs802025    | 7  | 86986632  | CROT          | T                 | C  | 0.058 | 0.683  | 0.225 | 2.36E-03 | 0.055 | 0.799  | 0.269 | 2.93E-03 | 0.057 | 0.731  | 0.172 | 2.22E-05 | ++ |
| rs13228213  | 7  | 24558290  |               | C                 | G  | 0.97  | -0.947 | 0.302 | 1.72E-03 | 0.979 | -1.094 | 0.381 | 4.08E-03 | 0.974 | -1.004 | 0.237 | 2.23E-05 | -- |
| rs66964668  | 14 | 30796768  |               | T                 | G  | 0.068 | 0.898  | 0.212 | 2.25E-05 |       |        |       |          | 0.068 | 0.898  | 0.212 | 2.25E-05 | +? |
| rs6909559   | 6  | 149251418 | UST           | A                 | T  | 0.634 | 0.566  | 0.139 | 4.52E-05 | 0.632 | 0.286  | 0.164 | 8.22E-02 | 0.633 | 0.45   | 0.106 | 2.26E-05 | ++ |
| rs577238531 | 13 | 37058031  |               | G                 | GT | 0.988 | -1.653 | 0.39  | 2.26E-05 |       |        |       |          | 0.988 | -1.653 | 0.39  | 2.26E-05 | -? |
| rs55786056  | 13 | 110018992 |               | T                 | C  | 0.11  | 0.543  | 0.18  | 2.52E-03 | 0.103 | 0.599  | 0.202 | 2.95E-03 | 0.107 | 0.568  | 0.134 | 2.30E-05 | ++ |
| rs62385557  | 6  | 14028851  |               | T                 | C  | 0.058 | 0.77   | 0.24  | 1.34E-03 | 0.062 | 0.765  | 0.277 | 5.76E-03 | 0.06  | 0.768  | 0.181 | 2.31E-05 | ++ |
| rs150391166 | 10 | 120073184 | FAM204A       | T                 | C  | 0.011 | 1.659  | 0.392 | 2.31E-05 |       |        |       |          | 0.011 | 1.659  | 0.392 | 2.31E-05 | +? |
| rs11168812  | 12 | 49361363  | WNT10B        | A                 | T  | 0.616 | -0.402 | 0.126 | 1.41E-03 | 0.608 | -0.415 | 0.149 | 5.48E-03 | 0.613 | -0.407 | 0.096 | 2.33E-05 | -- |
| rs7728691   | 5  | 86767630  |               | A                 | G  | 0.183 | 0.395  | 0.141 | 5.14E-03 | 0.168 | 0.574  | 0.175 | 1.07E-03 | 0.177 | 0.465  | 0.11  | 2.33E-05 | ++ |
| rs60017145  | 3  | 13568756  |               | T                 | C  | 0.468 | 0.637  | 0.133 | 1.79E-06 | 0.46  | 0.15   | 0.149 | 3.14E-01 | 0.464 | 0.42   | 0.099 | 2.34E-05 | ++ |
| rs60420459  | 8  | 16637175  |               | CAA               | C  | 0.986 | -1.488 | 0.398 | 1.87E-04 | 0.987 | -1.014 | 0.477 | 3.37E-02 | 0.987 | -1.293 | 0.306 | 2.34E-05 | -- |
| rs117751879 | 7  | 86276785  | GRM3          | A                 | G  | 0.968 | -0.808 | 0.285 | 4.53E-03 | 0.968 | -1.04  | 0.327 | 1.48E-03 | 0.968 | -0.908 | 0.215 | 2.35E-05 | -- |
| rs9644815   | 9  | 15547189  |               | T                 | G  | 0.086 | 0.766  | 0.181 | 2.36E-05 |       |        |       |          | 0.086 | 0.766  | 0.181 | 2.36E-05 | +? |
| rs78675214  | 12 | 49350686  | RP11-302B13.5 | A                 | AG | 0.384 | 0.401  | 0.126 | 1.47E-03 | 0.389 | 0.418  | 0.15  | 5.32E-03 | 0.386 | 0.408  | 0.097 | 2.36E-05 | ++ |
| rs7672      | 16 | 68294800  | PLA2G15       | C                 | G  | 0.273 | 0.476  | 0.142 | 8.24E-04 | 0.264 | 0.414  | 0.159 | 9.30E-03 | 0.269 | 0.448  | 0.106 | 2.37E-05 | ++ |
| rs560165688 | 1  | 217381532 |               | CAA<br>AAA<br>AAA | C  | 0.659 | -0.568 | 0.134 | 2.38E-05 |       |        |       |          | 0.659 | -0.568 | 0.134 | 2.38E-05 | -? |

|             |    |           |               |    |    |       |        |       |          |       |        |       |          |       |        |       | AAA      |    |
|-------------|----|-----------|---------------|----|----|-------|--------|-------|----------|-------|--------|-------|----------|-------|--------|-------|----------|----|
|             |    |           |               |    |    |       |        |       |          |       |        |       |          |       |        |       | AA       |    |
| rs116327131 | 2  | 205805004 | PARD3B        | A  | G  | 0.98  | -1.268 | 0.3   | 2.38E-05 |       |        |       |          | 0.98  | -1.268 | 0.3   | 2.38E-05 | -? |
| rs12222280  | 11 | 29938269  |               | T  | C  | 0.883 | -0.577 | 0.176 | 1.02E-03 | 0.894 | -0.57  | 0.215 | 7.90E-03 | 0.887 | -0.574 | 0.136 | 2.39E-05 | -- |
| rs57183663  | 9  | 126489993 | DENND1A       | G  | GA | 0.048 | 1.027  | 0.232 | 9.91E-06 | 0.049 | 0.356  | 0.31  | 2.51E-01 | 0.048 | 0.786  | 0.186 | 2.39E-05 | ++ |
| rs802024    | 7  | 86985719  | CROT          | T  | C  | 0.059 | 0.669  | 0.225 | 2.90E-03 | 0.055 | 0.814  | 0.269 | 2.51E-03 | 0.057 | 0.729  | 0.172 | 2.41E-05 | ++ |
| rs11030859  | 11 | 29893775  |               | A  | G  | 0.106 | 0.547  | 0.18  | 2.30E-03 | 0.1   | 0.633  | 0.215 | 3.30E-03 | 0.104 | 0.582  | 0.138 | 2.41E-05 | ++ |
| rs11168798  | 12 | 49345137  | RP11-302B13.5 | A  | G  | 0.384 | 0.402  | 0.126 | 1.41E-03 | 0.389 | 0.415  | 0.15  | 5.71E-03 | 0.386 | 0.407  | 0.097 | 2.42E-05 | ++ |
| rs11168800  | 12 | 49345657  | RP11-302B13.5 | T  | C  | 0.384 | 0.402  | 0.126 | 1.41E-03 | 0.389 | 0.415  | 0.15  | 5.71E-03 | 0.386 | 0.407  | 0.097 | 2.42E-05 | ++ |
| rs11168803  | 12 | 49346058  | RP11-302B13.5 | A  | T  | 0.616 | -0.402 | 0.126 | 1.41E-03 | 0.611 | -0.415 | 0.15  | 5.71E-03 | 0.614 | -0.407 | 0.097 | 2.42E-05 | -- |
| rs4747389   | 10 | 20218657  | PLXDC2        | C  | G  | 0.136 | 0.556  | 0.165 | 7.52E-04 | 0.134 | 0.491  | 0.192 | 1.07E-02 | 0.135 | 0.528  | 0.125 | 2.45E-05 | ++ |
| rs10875900  | 12 | 49344680  | RP11-302B13.5 | T  | C  | 0.616 | -0.402 | 0.126 | 1.43E-03 | 0.611 | -0.415 | 0.15  | 5.71E-03 | 0.614 | -0.407 | 0.097 | 2.46E-05 | -- |
| rs10501118  | 11 | 29895210  |               | A  | G  | 0.891 | -0.516 | 0.18  | 4.06E-03 | 0.899 | -0.67  | 0.214 | 1.72E-03 | 0.894 | -0.58  | 0.138 | 2.48E-05 | -- |
| rs76077935  | 4  | 86536380  | ARHGAP24      | T  | C  | 0.972 | -1.112 | 0.264 | 2.49E-05 |       |        |       |          | 0.972 | -1.112 | 0.264 | 2.49E-05 | -? |
| rs75203428  | 18 | 33937953  | FHOD3         | CT | C  | 0.898 | -0.537 | 0.178 | 2.55E-03 | 0.902 | -0.654 | 0.22  | 2.95E-03 | 0.9   | -0.583 | 0.138 | 2.49E-05 | -- |
| rs116905150 | 6  | 70884798  | COL19A1       | A  | G  | 0.03  | 1.162  | 0.276 | 2.51E-05 |       |        |       |          | 0.03  | 1.162  | 0.276 | 2.51E-05 | +? |
| rs62421864  | 6  | 111342098 | RPF2          | A  | G  | 0.206 | 0.464  | 0.146 | 1.52E-03 | 0.189 | 0.475  | 0.171 | 5.51E-03 | 0.199 | 0.469  | 0.111 | 2.51E-05 | ++ |
| rs12153853  | 6  | 10599496  | GCNT2         | T  | C  | 0.476 | -0.331 | 0.126 | 8.39E-03 | 0.512 | -0.542 | 0.157 | 5.63E-04 | 0.49  | -0.414 | 0.098 | 2.52E-05 | -- |
| rs4526804   | 12 | 49347581  | RP11-302B13.5 | T  | C  | 0.384 | 0.401  | 0.126 | 1.47E-03 | 0.389 | 0.415  | 0.15  | 5.71E-03 | 0.386 | 0.407  | 0.097 | 2.53E-05 | ++ |
| rs9783477   | 12 | 49347931  | RP11-302B13.5 | T  | C  | 0.616 | -0.401 | 0.126 | 1.47E-03 | 0.611 | -0.415 | 0.15  | 5.71E-03 | 0.614 | -0.407 | 0.097 | 2.53E-05 | -- |
| rs9783452   | 12 | 49349377  | RP11-302B13.5 | T  | C  | 0.384 | 0.401  | 0.126 | 1.47E-03 | 0.389 | 0.415  | 0.15  | 5.71E-03 | 0.386 | 0.407  | 0.097 | 2.53E-05 | ++ |
| rs6680664   | 1  | 97352971  |               | T  | G  | 0.05  | 0.96   | 0.233 | 3.72E-05 | 0.049 | 0.468  | 0.302 | 1.21E-01 | 0.05  | 0.777  | 0.184 | 2.53E-05 | ++ |
| rs6669942   | 1  | 97353389  |               | A  | G  | 0.95  | -0.96  | 0.233 | 3.72E-05 | 0.951 | -0.468 | 0.302 | 1.21E-01 | 0.95  | -0.777 | 0.184 | 2.53E-05 | -- |
| rs73133329  | 1  | 224728658 | CNIH3         | A  | G  | 0.03  | 1.18   | 0.28  | 2.54E-05 |       |        |       |          | 0.03  | 1.18   | 0.28  | 2.54E-05 | +? |
| rs56003829  | 2  | 1392929   | TPO           | A  | G  | 0.351 | 0.53   | 0.126 | 2.55E-05 |       |        |       |          | 0.351 | 0.53   | 0.126 | 2.55E-05 | +? |
| rs11030854  | 11 | 29882601  |               | T  | C  | 0.883 | -0.551 | 0.172 | 1.37E-03 | 0.892 | -0.584 | 0.214 | 6.27E-03 | 0.886 | -0.564 | 0.134 | 2.57E-05 | -- |
| rs10140487  | 14 | 95500317  |               | A  | G  | 0.027 | 1.144  | 0.272 | 2.59E-05 |       |        |       |          | 0.027 | 1.144  | 0.272 | 2.59E-05 | +? |
| rs112714763 | 7  | 86969315  |               | A  | T  | 0.059 | 0.669  | 0.225 | 2.90E-03 | 0.055 | 0.804  | 0.269 | 2.79E-03 | 0.057 | 0.725  | 0.172 | 2.64E-05 | ++ |
| rs2339734   | 8  | 93781703  |               | T  | C  | 0.948 | -0.74  | 0.23  | 1.32E-03 | 0.962 | -0.819 | 0.301 | 6.58E-03 | 0.953 | -0.769 | 0.183 | 2.65E-05 | -- |

|             |    |           |         |    |    |       |        |       |          |       |        |       |          |       |        |       |          |    |
|-------------|----|-----------|---------|----|----|-------|--------|-------|----------|-------|--------|-------|----------|-------|--------|-------|----------|----|
| rs78763838  | 5  | 7926765   |         | T  | C  | 0.045 | 0.507  | 0.277 | 6.77E-02 | 0.044 | 1.106  | 0.271 | 4.45E-05 | 0.045 | 0.813  | 0.194 | 2.70E-05 | ++ |
| rs117249777 | 6  | 94390462  |         | T  | C  | 0.952 | -0.985 | 0.235 | 2.73E-05 |       |        |       |          | 0.952 | -0.985 | 0.235 | 2.73E-05 | -? |
| rs112796991 | 7  | 86983328  | CROT    | T  | C  | 0.059 | 0.669  | 0.225 | 2.90E-03 | 0.055 | 0.802  | 0.269 | 2.90E-03 | 0.057 | 0.723  | 0.172 | 2.73E-05 | ++ |
| rs6940841   | 6  | 149249546 | UST     | T  | C  | 0.366 | -0.566 | 0.139 | 4.52E-05 | 0.366 | -0.274 | 0.165 | 9.60E-02 | 0.366 | -0.445 | 0.106 | 2.78E-05 | -- |
| rs9404007   | 6  | 149252323 | UST     | T  | C  | 0.366 | -0.566 | 0.139 | 4.52E-05 | 0.366 | -0.274 | 0.165 | 9.60E-02 | 0.366 | -0.445 | 0.106 | 2.78E-05 | -- |
| rs371078415 | 2  | 213204401 | ERBB4   | A  | AT | 0.048 | 0.549  | 0.244 | 2.43E-02 | 0.046 | 0.959  | 0.258 | 2.05E-04 | 0.048 | 0.742  | 0.177 | 2.85E-05 | ++ |
| rs10060927  | 5  | 177833721 | COL23A1 | A  | G  | 0.012 | 1.607  | 0.384 | 2.85E-05 |       |        |       |          | 0.012 | 1.607  | 0.384 | 2.85E-05 | +  |
| rs138002092 | 17 | 12391719  |         | A  | G  | 0.012 | 1.725  | 0.412 | 2.86E-05 |       |        |       |          | 0.012 | 1.725  | 0.412 | 2.86E-05 | +  |
| rs7319068   | 13 | 23681661  |         | T  | G  | 0.74  | 0.668  | 0.173 | 1.10E-04 | 0.718 | 0.359  | 0.178 | 4.29E-02 | 0.729 | 0.518  | 0.124 | 2.87E-05 | ++ |
| rs73201584  | 12 | 87825222  |         | T  | C  | 0.029 | 1.2    | 0.265 | 6.01E-06 | 0.029 | 0.305  | 0.39  | 4.35E-01 | 0.029 | 0.917  | 0.219 | 2.88E-05 | ++ |
| rs73201588  | 12 | 87827514  |         | A  | T  | 0.971 | -1.2   | 0.265 | 6.01E-06 | 0.971 | -0.305 | 0.39  | 4.35E-01 | 0.971 | -0.917 | 0.219 | 2.88E-05 | -- |
| rs73203510  | 12 | 87841055  |         | T  | C  | 0.971 | -1.2   | 0.265 | 6.01E-06 | 0.971 | -0.305 | 0.39  | 4.35E-01 | 0.971 | -0.917 | 0.219 | 2.88E-05 | -- |
| rs73203516  | 12 | 87842263  |         | T  | C  | 0.029 | 1.2    | 0.265 | 6.01E-06 | 0.029 | 0.305  | 0.39  | 4.35E-01 | 0.029 | 0.917  | 0.219 | 2.88E-05 | ++ |
| rs68045477  | 12 | 87842300  |         | A  | T  | 0.029 | 1.2    | 0.265 | 6.01E-06 | 0.029 | 0.305  | 0.39  | 4.35E-01 | 0.029 | 0.917  | 0.219 | 2.88E-05 | ++ |
| rs67896401  | 12 | 87843550  |         | T  | C  | 0.029 | 1.2    | 0.265 | 6.01E-06 | 0.029 | 0.305  | 0.39  | 4.35E-01 | 0.029 | 0.917  | 0.219 | 2.88E-05 | ++ |
| rs73203525  | 12 | 87846448  |         | T  | C  | 0.029 | 1.2    | 0.265 | 6.01E-06 | 0.029 | 0.305  | 0.39  | 4.35E-01 | 0.029 | 0.917  | 0.219 | 2.88E-05 | ++ |
| rs55943699  | 12 | 87846643  |         | A  | C  | 0.971 | -1.2   | 0.265 | 6.01E-06 | 0.971 | -0.305 | 0.39  | 4.35E-01 | 0.971 | -0.917 | 0.219 | 2.88E-05 | -- |
| rs73189250  | 12 | 87847141  |         | A  | C  | 0.029 | 1.2    | 0.265 | 6.01E-06 | 0.029 | 0.305  | 0.39  | 4.35E-01 | 0.029 | 0.917  | 0.219 | 2.88E-05 | ++ |
| rs4624015   | 13 | 110087890 |         | T  | G  | 0.15  | 0.609  | 0.161 | 1.62E-04 | 0.152 | 0.372  | 0.181 | 4.03E-02 | 0.151 | 0.504  | 0.12  | 2.89E-05 | ++ |
| rs62228689  | 21 | 45284209  |         | A  | G  | 0.028 | 1.247  | 0.274 | 5.45E-06 | 0.031 | 0.303  | 0.399 | 4.47E-01 | 0.029 | 0.944  | 0.226 | 2.95E-05 | ++ |
| rs62228690  | 21 | 45284210  |         | A  | C  | 0.028 | 1.247  | 0.274 | 5.45E-06 | 0.031 | 0.303  | 0.399 | 4.47E-01 | 0.029 | 0.944  | 0.226 | 2.95E-05 | ++ |
| rs711249    | 2  | 36731860  | CRIM1   | A  | G  | 0.243 | 0.452  | 0.139 | 1.15E-03 | 0.244 | 0.44   | 0.168 | 8.74E-03 | 0.243 | 0.447  | 0.107 | 2.97E-05 | ++ |
| rs1123423   | 5  | 7932244   |         | A  | G  | 0.045 | 0.497  | 0.277 | 7.26E-02 | 0.044 | 1.106  | 0.271 | 4.45E-05 | 0.045 | 0.808  | 0.194 | 2.99E-05 | ++ |
| rs141428478 | 7  | 86968232  |         | A  | AT | 0.059 | 0.669  | 0.225 | 2.90E-03 | 0.055 | 0.79   | 0.268 | 3.26E-03 | 0.057 | 0.719  | 0.172 | 3.01E-05 | ++ |
| rs56409711  | 16 | 13267012  | SHISA9  | A  | G  | 0.676 | -0.532 | 0.128 | 3.05E-05 |       |        |       |          | 0.676 | -0.532 | 0.128 | 3.05E-05 | -? |
| rs573889921 | 16 | 29703745  | QPRT    | CA | C  | 0.031 | 1.067  | 0.256 | 3.06E-05 |       |        |       |          | 0.031 | 1.067  | 0.256 | 3.06E-05 | +  |
| rs59390327  | 12 | 129323252 |         | G  | GA | 0.307 | 0.473  | 0.127 | 2.06E-04 | 0.299 | 0.331  | 0.164 | 4.36E-02 | 0.304 | 0.419  | 0.101 | 3.06E-05 | ++ |
| rs147106863 | 17 | 55620889  | MSI2    | G  | GC | 0.979 | -1.301 | 0.312 | 3.12E-05 |       |        |       |          | 0.979 | -1.301 | 0.312 | 3.12E-05 | -? |

|             |    |           |         |     |                                                   |       |        |       |          |       |        |       |          |       |        |       |          |    |
|-------------|----|-----------|---------|-----|---------------------------------------------------|-------|--------|-------|----------|-------|--------|-------|----------|-------|--------|-------|----------|----|
| rs9521368   | 13 | 110077751 |         | T   | G                                                 | 0.85  | -0.606 | 0.161 | 1.73E-04 | 0.848 | -0.37  | 0.181 | 4.12E-02 | 0.849 | -0.502 | 0.121 | 3.14E-05 | -- |
| rs12348143  | 9  | 79153853  |         | C   | G                                                 | 0.015 | 1.411  | 0.339 | 3.16E-05 |       |        |       |          | 0.015 | 1.411  | 0.339 | 3.16E-05 | +? |
| rs12344097  | 9  | 79153868  |         | A   | G                                                 | 0.985 | -1.411 | 0.339 | 3.16E-05 |       |        |       |          | 0.985 | -1.411 | 0.339 | 3.16E-05 | -? |
| rs7211577   | 17 | 14114280  |         | A   | G                                                 | 0.515 | 0.542  | 0.13  | 3.17E-05 |       |        |       |          | 0.515 | 0.542  | 0.13  | 3.17E-05 | +? |
| rs848530    | 2  | 36730786  | CRIM1   | C   | G                                                 | 0.758 | -0.457 | 0.139 | 1.01E-03 | 0.758 | -0.429 | 0.168 | 1.07E-02 | 0.758 | -0.446 | 0.107 | 3.18E-05 | -- |
| rs12484168  | 22 | 48600443  |         | T   | C                                                 | 0.878 | -0.624 | 0.172 | 2.81E-04 | 0.875 | -0.434 | 0.202 | 3.16E-02 | 0.877 | -0.544 | 0.131 | 3.19E-05 | -- |
| rs9615279   | 22 | 48600677  |         | T   | C<br>TT<br>GA<br>TT<br>CA<br>TC<br>CT<br>TG<br>CC | 0.122 | 0.624  | 0.172 | 2.81E-04 | 0.125 | 0.434  | 0.202 | 3.16E-02 | 0.123 | 0.544  | 0.131 | 3.19E-05 | ++ |
| rs113433376 | 11 | 29922377  |         | T   | CC                                                | 0.118 | 0.515  | 0.174 | 3.00E-03 | 0.109 | 0.623  | 0.212 | 3.28E-03 | 0.114 | 0.558  | 0.134 | 3.20E-05 | ++ |
| rs10847703  | 12 | 129340533 | GLT1D1  | A   | G<br>TT                                           | 0.276 | 0.419  | 0.129 | 1.19E-03 | 0.269 | 0.44   | 0.169 | 9.25E-03 | 0.274 | 0.426  | 0.103 | 3.23E-05 | ++ |
| rs143366645 | 4  | 25027224  | LGI2    | T   | GA                                                | 0.014 | 1.509  | 0.363 | 3.23E-05 |       |        |       |          | 0.014 | 1.509  | 0.363 | 3.23E-05 | +? |
| rs10012345  | 4  | 25027371  | LGI2    | T   | C                                                 | 0.014 | 1.509  | 0.363 | 3.23E-05 |       |        |       |          | 0.014 | 1.509  | 0.363 | 3.23E-05 | +? |
| rs78093441  | 8  | 43372298  |         | T   | C                                                 | 0.05  | 0.927  | 0.223 | 3.29E-05 |       |        |       |          | 0.05  | 0.927  | 0.223 | 3.29E-05 | +? |
| rs73654595  | 9  | 98431423  |         | C   | G                                                 |       |        |       |          | 0.011 | 1.874  | 0.451 | 3.29E-05 | 0.011 | 1.874  | 0.451 | 3.29E-05 | ?+ |
| rs117768394 | 6  | 70805125  | COL19A1 | C   | G                                                 | 0.974 | -1.204 | 0.29  | 3.31E-05 |       |        |       |          | 0.974 | -1.204 | 0.29  | 3.31E-05 | -? |
| rs1044388   | 6  | 111346808 | RPF2    | A   | G                                                 | 0.207 | 0.45   | 0.146 | 2.01E-03 | 0.189 | 0.475  | 0.171 | 5.51E-03 | 0.199 | 0.46   | 0.111 | 3.32E-05 | ++ |
| rs1044389   | 6  | 111346843 | RPF2    | A   | G                                                 | 0.207 | 0.45   | 0.146 | 2.01E-03 | 0.189 | 0.475  | 0.171 | 5.51E-03 | 0.199 | 0.46   | 0.111 | 3.32E-05 | ++ |
| rs375417629 | 4  | 115328123 |         | CAA | C                                                 | 0.818 | -0.644 | 0.155 | 3.34E-05 |       |        |       |          | 0.818 | -0.644 | 0.155 | 3.34E-05 | -? |
| rs144971853 | 12 | 87838452  |         | CAA | C                                                 | 0.972 | -1.143 | 0.261 | 1.20E-05 | 0.976 | -0.343 | 0.417 | 4.10E-01 | 0.973 | -0.917 | 0.221 | 3.37E-05 | -- |
| rs1415120   | 11 | 29884095  |         | T   | C                                                 | 0.109 | 0.517  | 0.179 | 3.78E-03 | 0.098 | 0.655  | 0.218 | 2.67E-03 | 0.104 | 0.573  | 0.138 | 3.42E-05 | ++ |
| rs6914065   | 6  | 149251599 | UST     | A   | C                                                 | 0.634 | 0.566  | 0.139 | 4.52E-05 | 0.631 | 0.261  | 0.164 | 1.11E-01 | 0.633 | 0.439  | 0.106 | 3.44E-05 | ++ |
| rs72878965  | 11 | 29910344  |         | T   | C                                                 | 0.882 | -0.515 | 0.174 | 3.00E-03 | 0.891 | -0.618 | 0.212 | 3.57E-03 | 0.886 | -0.556 | 0.134 | 3.45E-05 | -- |
| rs72848177  | 17 | 65578416  | PITPNC1 | T   | G<br>AT                                           | 0.97  | -1.155 | 0.279 | 3.45E-05 |       |        |       |          | 0.97  | -1.155 | 0.279 | 3.45E-05 | -? |
| rs78463012  | 11 | 29884695  |         | A   | TC                                                | 0.106 | 0.551  | 0.18  | 2.22E-03 | 0.099 | 0.612  | 0.219 | 5.24E-03 | 0.103 | 0.575  | 0.139 | 3.53E-05 | ++ |
| rs1026901   | 6  | 149246207 | UST     | C   | G                                                 | 0.633 | 0.579  | 0.14  | 3.55E-05 | 0.63  | 0.249  | 0.163 | 1.26E-01 | 0.632 | 0.439  | 0.106 | 3.58E-05 | ++ |
| rs6570910   | 6  | 149245531 | UST     | A   | G                                                 | 0.365 | -0.56  | 0.14  | 6.30E-05 | 0.366 | -0.275 | 0.164 | 9.44E-02 | 0.365 | -0.44  | 0.106 | 3.62E-05 | -- |



|             |    |           |               |   |   |       |        |       |          |       |        |       |          |       |        |       |          |    |
|-------------|----|-----------|---------------|---|---|-------|--------|-------|----------|-------|--------|-------|----------|-------|--------|-------|----------|----|
| rs6570911   | 6  | 149245564 | UST           | A | G | 0.365 | -0.56  | 0.14  | 6.30E-05 | 0.366 | -0.275 | 0.164 | 9.44E-02 | 0.365 | -0.44  | 0.106 | 3.62E-05 | -- |
| rs10431096  | 11 | 99820446  | CNTN5         | A | G | 0.065 | 0.717  | 0.22  | 1.14E-03 | 0.064 | 0.636  | 0.249 | 1.07E-02 | 0.064 | 0.681  | 0.165 | 3.65E-05 | ++ |
| rs11222007  | 11 | 99820883  | CNTN5         | C | G | 0.935 | -0.717 | 0.22  | 1.14E-03 | 0.936 | -0.636 | 0.249 | 1.07E-02 | 0.936 | -0.681 | 0.165 | 3.65E-05 | -- |
| rs117267411 | 8  | 2745380   |               | T | C | 0.99  | -1.689 | 0.409 | 3.67E-05 |       |        |       |          | 0.99  | -1.689 | 0.409 | 3.67E-05 | -? |
| rs112152350 | 1  | 97314440  |               | T | G | 0.95  | -0.878 | 0.235 | 1.89E-04 | 0.948 | -0.563 | 0.289 | 5.13E-02 | 0.949 | -0.753 | 0.182 | 3.68E-05 | -- |
| rs55780014  | 8  | 93705347  |               | A | T | 0.945 | -0.729 | 0.225 | 1.18E-03 | 0.96  | -0.767 | 0.301 | 1.07E-02 | 0.951 | -0.742 | 0.18  | 3.70E-05 | -- |
| rs77652639  | 2  | 3275680   | TSSC1         | T | C | 0.97  | -1.154 | 0.28  | 3.77E-05 |       |        |       |          | 0.97  | -1.154 | 0.28  | 3.77E-05 | -? |
| rs17080176  | 6  | 149256469 | UST           | A | G | 0.18  | -0.558 | 0.185 | 2.54E-03 | 0.159 | -0.754 | 0.263 | 4.09E-03 | 0.173 | -0.623 | 0.151 | 3.77E-05 | -- |
| rs11831047  | 12 | 87840567  |               | T | C | 0.971 | -1.2   | 0.265 | 6.01E-06 | 0.97  | -0.262 | 0.39  | 5.01E-01 | 0.97  | -0.903 | 0.219 | 3.78E-05 | -- |
| rs11832191  | 12 | 87841866  |               | T | C | 0.971 | -1.2   | 0.265 | 6.01E-06 | 0.97  | -0.262 | 0.39  | 5.01E-01 | 0.97  | -0.903 | 0.219 | 3.78E-05 | -- |
| rs17040395  | 4  | 110318688 |               | T | G | 0.012 | 1.519  | 0.369 | 3.80E-05 |       |        |       |          | 0.012 | 1.519  | 0.369 | 3.80E-05 | +? |
| rs17040401  | 4  | 110326576 |               | T | G | 0.988 | -1.519 | 0.369 | 3.80E-05 |       |        |       |          | 0.988 | -1.519 | 0.369 | 3.80E-05 | -? |
| rs6845967   | 4  | 110332917 |               | A | G | 0.988 | -1.519 | 0.369 | 3.80E-05 |       |        |       |          | 0.988 | -1.519 | 0.369 | 3.80E-05 | -? |
| rs143504774 | 1  | 184105545 |               | T | G | 0.052 | 0.667  | 0.225 | 3.00E-03 | 0.043 | 0.873  | 0.3   | 3.64E-03 | 0.049 | 0.741  | 0.18  | 3.81E-05 | ++ |
| rs58373535  | 6  | 3132790   | BPHL          | T | C | 0.986 | -1.522 | 0.37  | 3.82E-05 |       |        |       |          | 0.986 | -1.522 | 0.369 | 3.82E-05 | -? |
| rs11587659  | 1  | 242673874 | PLD5          | A | G | 0.167 | 0.559  | 0.156 | 3.30E-04 | 0.18  | 0.39   | 0.183 | 3.27E-02 | 0.173 | 0.488  | 0.118 | 3.82E-05 | ++ |
| rs1222268   | 4  | 59329616  |               | A | G | 0.45  | -0.56  | 0.136 | 3.83E-05 |       |        |       |          | 0.45  | -0.56  | 0.136 | 3.83E-05 | -? |
| rs10953423  | 7  | 77681979  | MAGI2         | T | C | 0.3   | -0.473 | 0.157 | 2.52E-03 | 0.294 | -0.517 | 0.184 | 5.05E-03 | 0.298 | -0.491 | 0.119 | 3.84E-05 | -- |
| rs2705452   | 4  | 156503942 |               | A | C | 0.479 | -0.362 | 0.126 | 3.93E-03 | 0.47  | -0.483 | 0.161 | 2.71E-03 | 0.476 | -0.408 | 0.099 | 3.84E-05 | -- |
| rs4237854   | 12 | 49324179  | RP11-302B13.5 | C | G | 0.615 | -0.389 | 0.127 | 2.26E-03 | 0.611 | -0.415 | 0.15  | 5.71E-03 | 0.613 | -0.4   | 0.097 | 3.84E-05 | -- |
| rs11168794  | 12 | 49325142  | RP11-302B13.5 | A | G | 0.385 | 0.389  | 0.127 | 2.26E-03 | 0.389 | 0.415  | 0.15  | 5.71E-03 | 0.387 | 0.4    | 0.097 | 3.84E-05 | ++ |
| rs12229275  | 12 | 49325840  | RP11-302B13.5 | A | T | 0.615 | -0.389 | 0.127 | 2.26E-03 | 0.611 | -0.415 | 0.15  | 5.71E-03 | 0.613 | -0.4   | 0.097 | 3.84E-05 | -- |
| rs61942166  | 12 | 49326147  | RP11-302B13.5 | A | C | 0.615 | -0.389 | 0.127 | 2.26E-03 | 0.611 | -0.415 | 0.15  | 5.71E-03 | 0.613 | -0.4   | 0.097 | 3.84E-05 | -- |
| rs61942167  | 12 | 49326440  | RP11-302B13.5 | T | C | 0.615 | -0.389 | 0.127 | 2.26E-03 | 0.611 | -0.415 | 0.15  | 5.71E-03 | 0.613 | -0.4   | 0.097 | 3.84E-05 | -- |
| rs1830192   | 12 | 49326687  | RP11-302B13.5 | T | C | 0.615 | -0.389 | 0.127 | 2.26E-03 | 0.611 | -0.415 | 0.15  | 5.71E-03 | 0.613 | -0.4   | 0.097 | 3.84E-05 | -- |
| rs1818996   | 12 | 49326774  | RP11-302B13.5 | A | G | 0.385 | 0.389  | 0.127 | 2.26E-03 | 0.389 | 0.415  | 0.15  | 5.71E-03 | 0.387 | 0.4    | 0.097 | 3.84E-05 | ++ |
| rs11168795  | 12 | 49327458  | RP11-302B13.5 | T | C | 0.615 | -0.389 | 0.127 | 2.26E-03 | 0.611 | -0.415 | 0.15  | 5.71E-03 | 0.613 | -0.4   | 0.097 | 3.84E-05 | -- |
| rs10875897  | 12 | 49327694  | RP11-302B13.5 | T | C | 0.615 | -0.389 | 0.127 | 2.26E-03 | 0.611 | -0.415 | 0.15  | 5.71E-03 | 0.613 | -0.4   | 0.097 | 3.84E-05 | -- |

|             |    |           |               |   |    |       |        |       |          |       |        |       |          |       |        |       |          |    |
|-------------|----|-----------|---------------|---|----|-------|--------|-------|----------|-------|--------|-------|----------|-------|--------|-------|----------|----|
| rs2073480   | 12 | 49332012  | RP11-302B13.5 | A | G  | 0.615 | -0.389 | 0.127 | 2.26E-03 | 0.611 | -0.415 | 0.15  | 5.71E-03 | 0.613 | -0.4   | 0.097 | 3.84E-05 | -- |
| rs1054376   | 12 | 49332092  | RP11-302B13.5 | A | G  | 0.385 | 0.389  | 0.127 | 2.26E-03 | 0.389 | 0.415  | 0.15  | 5.71E-03 | 0.387 | 0.4    | 0.097 | 3.84E-05 | ++ |
| rs4760666   | 12 | 49332366  | RP11-302B13.5 | T | C  | 0.385 | 0.389  | 0.127 | 2.26E-03 | 0.389 | 0.415  | 0.15  | 5.71E-03 | 0.387 | 0.4    | 0.097 | 3.84E-05 | ++ |
| rs538033634 | 12 | 49333896  | RP11-302B13.5 | G | GA | 0.615 | -0.389 | 0.127 | 2.26E-03 | 0.611 | -0.415 | 0.15  | 5.71E-03 | 0.613 | -0.4   | 0.097 | 3.84E-05 | -- |
| rs10747557  | 12 | 49334982  | RP11-302B13.5 | C | G  | 0.385 | 0.389  | 0.127 | 2.26E-03 | 0.389 | 0.415  | 0.15  | 5.71E-03 | 0.387 | 0.4    | 0.097 | 3.84E-05 | ++ |
| rs2131713   | 12 | 49335511  | RP11-302B13.5 | T | C  | 0.385 | 0.389  | 0.127 | 2.26E-03 | 0.389 | 0.415  | 0.15  | 5.71E-03 | 0.387 | 0.4    | 0.097 | 3.84E-05 | ++ |
| rs2030900   | 12 | 49336402  | RP11-302B13.5 | T | G  | 0.615 | -0.389 | 0.127 | 2.26E-03 | 0.611 | -0.415 | 0.15  | 5.71E-03 | 0.613 | -0.4   | 0.097 | 3.84E-05 | -- |
| rs4018510   | 12 | 49336789  | RP11-302B13.5 | T | C  | 0.615 | -0.389 | 0.127 | 2.26E-03 | 0.611 | -0.415 | 0.15  | 5.71E-03 | 0.613 | -0.4   | 0.097 | 3.84E-05 | -- |
| rs4760667   | 12 | 49337287  | RP11-302B13.5 | T | C  | 0.385 | 0.389  | 0.127 | 2.26E-03 | 0.389 | 0.415  | 0.15  | 5.71E-03 | 0.387 | 0.4    | 0.097 | 3.84E-05 | ++ |
| rs10875898  | 12 | 49337537  | RP11-302B13.5 | C | G  | 0.615 | -0.389 | 0.127 | 2.26E-03 | 0.611 | -0.415 | 0.15  | 5.71E-03 | 0.613 | -0.4   | 0.097 | 3.84E-05 | -- |
| rs78843695  | 12 | 49338778  | RP11-302B13.5 | T | TA | 0.385 | 0.389  | 0.127 | 2.26E-03 | 0.389 | 0.415  | 0.15  | 5.71E-03 | 0.387 | 0.4    | 0.097 | 3.84E-05 | ++ |
| rs11168797  | 12 | 49338841  | RP11-302B13.5 | T | G  | 0.385 | 0.389  | 0.127 | 2.26E-03 | 0.389 | 0.415  | 0.15  | 5.71E-03 | 0.387 | 0.4    | 0.097 | 3.84E-05 | ++ |
| rs4760668   | 12 | 49341010  | RP11-302B13.5 | T | G  | 0.385 | 0.389  | 0.127 | 2.26E-03 | 0.389 | 0.415  | 0.15  | 5.71E-03 | 0.387 | 0.4    | 0.097 | 3.84E-05 | ++ |
| rs61942169  | 12 | 49341893  | RP11-302B13.5 | A | C  | 0.385 | 0.389  | 0.127 | 2.26E-03 | 0.389 | 0.415  | 0.15  | 5.71E-03 | 0.387 | 0.4    | 0.097 | 3.84E-05 | ++ |
| rs111429154 | 9  | 15710546  | CCDC171       | A | G  | 0.079 | 0.793  | 0.193 | 3.84E-05 |       |        |       |          | 0.079 | 0.793  | 0.193 | 3.84E-05 | +  |
| rs369804666 | 12 | 49338923  | RP11-302B13.5 | T | TA | 0.396 | 0.389  | 0.126 | 2.00E-03 | 0.396 | 0.409  | 0.15  | 6.48E-03 | 0.396 | 0.397  | 0.097 | 3.84E-05 | ++ |
| rs16971238  | 15 | 41255257  |               | T | C  | 0.014 | 1.475  | 0.358 | 3.85E-05 |       |        |       |          | 0.014 | 1.474  | 0.358 | 3.85E-05 | +  |
| rs73402541  | 15 | 41255492  |               | T | C  | 0.014 | 1.475  | 0.358 | 3.85E-05 |       |        |       |          | 0.014 | 1.474  | 0.358 | 3.85E-05 | +  |
| rs117188437 | 16 | 84199815  | DNAAF1        | A | T  | 0.083 | 0.328  | 0.225 | 1.44E-01 | 0.092 | 0.914  | 0.213 | 1.80E-05 | 0.088 | 0.636  | 0.155 | 3.86E-05 | ++ |
| rs2696291   | 17 | 48353084  | TMEM92        | T | C  | 0.748 | -0.572 | 0.139 | 3.93E-05 |       |        |       |          | 0.748 | -0.572 | 0.139 | 3.93E-05 | -? |
| rs6905041   | 6  | 110936144 | CDK19         | T | C  | 0.198 | 0.409  | 0.155 | 8.52E-03 | 0.189 | 0.547  | 0.17  | 1.30E-03 | 0.194 | 0.472  | 0.115 | 3.94E-05 | ++ |
| rs2272311   | 12 | 49329695  | RP11-302B13.5 | A | G  | 0.615 | -0.389 | 0.127 | 2.26E-03 | 0.61  | -0.414 | 0.15  | 5.89E-03 | 0.613 | -0.4   | 0.097 | 3.95E-05 | -- |
| rs141826252 | 2  | 213186294 | ERBB4         | T | C  | 0.041 | 0.521  | 0.262 | 4.68E-02 | 0.042 | 1.049  | 0.272 | 1.14E-04 | 0.042 | 0.776  | 0.189 | 3.96E-05 | ++ |
| rs76509375  | 6  | 111353398 |               | C | G  | 0.207 | 0.446  | 0.146 | 2.21E-03 | 0.189 | 0.47   | 0.171 | 6.07E-03 | 0.2   | 0.456  | 0.111 | 3.97E-05 | ++ |
| rs62421895  | 6  | 111353642 |               | A | G  | 0.793 | -0.446 | 0.146 | 2.21E-03 | 0.811 | -0.47  | 0.171 | 6.07E-03 | 0.8   | -0.456 | 0.111 | 3.97E-05 | -- |
| rs62421896  | 6  | 111353658 |               | A | G  | 0.207 | 0.446  | 0.146 | 2.21E-03 | 0.189 | 0.47   | 0.171 | 6.07E-03 | 0.2   | 0.456  | 0.111 | 3.97E-05 | ++ |
| rs12527783  | 6  | 111355785 |               | T | G  | 0.793 | -0.446 | 0.146 | 2.21E-03 | 0.811 | -0.47  | 0.171 | 6.07E-03 | 0.8   | -0.456 | 0.111 | 3.97E-05 | -- |

|             |    |           |               |     |                                 |       |        |       |          |       |        |       |          |       |        |       |          |    |
|-------------|----|-----------|---------------|-----|---------------------------------|-------|--------|-------|----------|-------|--------|-------|----------|-------|--------|-------|----------|----|
| rs1550756   | 3  | 124065433 | KALRN         | C   | G                               | 0.354 | 0.45   | 0.132 | 6.50E-04 | 0.356 | 0.351  | 0.15  | 1.91E-02 | 0.355 | 0.407  | 0.099 | 4.00E-05 | ++ |
| rs11584120  | 1  | 97316509  |               | A   | G                               | 0.051 | 0.871  | 0.235 | 2.09E-04 | 0.052 | 0.563  | 0.289 | 5.13E-02 | 0.051 | 0.749  | 0.182 | 4.01E-05 | ++ |
| rs147911368 | 1  | 97319841  |               | T   | C                               | 0.949 | -0.871 | 0.235 | 2.09E-04 | 0.948 | -0.563 | 0.289 | 5.13E-02 | 0.949 | -0.749 | 0.182 | 4.01E-05 | -- |
| rs371592264 | 1  | 97320131  |               | T   | C                               | 0.051 | 0.871  | 0.235 | 2.09E-04 | 0.052 | 0.563  | 0.289 | 5.13E-02 | 0.051 | 0.749  | 0.182 | 4.01E-05 | ++ |
| rs11497391  | 1  | 97321516  |               | T   | G                               | 0.051 | 0.871  | 0.235 | 2.09E-04 | 0.052 | 0.563  | 0.289 | 5.13E-02 | 0.051 | 0.749  | 0.182 | 4.01E-05 | ++ |
| rs11497394  | 1  | 97321725  |               | A   | T                               | 0.051 | 0.871  | 0.235 | 2.09E-04 | 0.052 | 0.563  | 0.289 | 5.13E-02 | 0.051 | 0.749  | 0.182 | 4.01E-05 | ++ |
| rs139762434 | 1  | 97323460  |               | A   | G                               | 0.949 | -0.871 | 0.235 | 2.09E-04 | 0.948 | -0.563 | 0.289 | 5.13E-02 | 0.949 | -0.749 | 0.182 | 4.01E-05 | -- |
| rs11485406  | 1  | 97323498  |               | A   | G                               | 0.051 | 0.871  | 0.235 | 2.09E-04 | 0.052 | 0.563  | 0.289 | 5.13E-02 | 0.051 | 0.749  | 0.182 | 4.01E-05 | ++ |
| rs12077790  | 1  | 97324265  |               | A   | G                               | 0.949 | -0.871 | 0.235 | 2.09E-04 | 0.948 | -0.563 | 0.289 | 5.13E-02 | 0.949 | -0.749 | 0.182 | 4.01E-05 | -- |
| rs12093130  | 1  | 97324527  |               | T   | C                               | 0.051 | 0.871  | 0.235 | 2.09E-04 | 0.052 | 0.563  | 0.289 | 5.13E-02 | 0.051 | 0.749  | 0.182 | 4.01E-05 | ++ |
| rs7533256   | 1  | 97325148  |               | T   | C                               | 0.949 | -0.871 | 0.235 | 2.09E-04 | 0.948 | -0.563 | 0.289 | 5.13E-02 | 0.949 | -0.749 | 0.182 | 4.01E-05 | -- |
| rs11485408  | 1  | 97325442  |               | A   | C                               | 0.051 | 0.871  | 0.235 | 2.09E-04 | 0.052 | 0.563  | 0.289 | 5.13E-02 | 0.051 | 0.749  | 0.182 | 4.01E-05 | ++ |
| rs11584817  | 1  | 97325914  |               | T   | G                               | 0.949 | -0.871 | 0.235 | 2.09E-04 | 0.948 | -0.563 | 0.289 | 5.13E-02 | 0.949 | -0.749 | 0.182 | 4.01E-05 | -- |
| rs10747558  | 12 | 49344401  | RP11-302B13.5 | C   | G                               | 0.616 | -0.385 | 0.127 | 2.36E-03 | 0.611 | -0.415 | 0.15  | 5.71E-03 | 0.614 | -0.398 | 0.097 | 4.01E-05 | -- |
| rs11222004  | 11 | 99819795  | CNTN5         | A   | T                               | 0.935 | -0.717 | 0.22  | 1.14E-03 | 0.936 | -0.626 | 0.249 | 1.19E-02 | 0.936 | -0.677 | 0.165 | 4.06E-05 | -- |
| rs9325143   | 12 | 49353027  |               | A   | G                               | 0.375 | 0.359  | 0.125 | 3.97E-03 | 0.384 | 0.444  | 0.15  | 3.12E-03 | 0.379 | 0.394  | 0.096 | 4.06E-05 | ++ |
| rs34851054  | 3  | 110109417 |               | CCA | C                               | 0.106 | 0.688  | 0.168 | 4.10E-05 |       |        |       |          | 0.106 | 0.688  | 0.168 | 4.10E-05 | +  |
| rs117666456 | 12 | 87811639  |               | A   | G                               | 0.037 | 1.031  | 0.251 | 3.89E-05 | 0.036 | 0.452  | 0.336 | 1.79E-01 | 0.036 | 0.824  | 0.201 | 4.11E-05 | ++ |
| rs55996691  | 12 | 87815977  |               | A   | G                               | 0.963 | -1.031 | 0.251 | 3.89E-05 | 0.964 | -0.452 | 0.336 | 1.79E-01 | 0.964 | -0.824 | 0.201 | 4.11E-05 | -- |
| rs73201574  | 12 | 87817005  |               | T   | G                               | 0.963 | -1.031 | 0.251 | 3.89E-05 | 0.964 | -0.452 | 0.336 | 1.79E-01 | 0.964 | -0.824 | 0.201 | 4.11E-05 | -- |
| rs577511305 | 12 | 87817621  |               | A   | G<br>AG<br>CT<br>TC<br>TC<br>TT | 0.963 | -1.031 | 0.251 | 3.89E-05 | 0.964 | -0.452 | 0.336 | 1.79E-01 | 0.964 | -0.824 | 0.201 | 4.11E-05 | -- |
| rs148496689 | 12 | 87818827  |               | A   | T                               | 0.037 | 1.031  | 0.251 | 3.89E-05 | 0.036 | 0.452  | 0.336 | 1.79E-01 | 0.036 | 0.824  | 0.201 | 4.11E-05 | ++ |
| rs145618836 | 12 | 87826643  |               | A   | AT                              | 0.963 | -1.031 | 0.251 | 3.89E-05 | 0.964 | -0.452 | 0.336 | 1.79E-01 | 0.964 | -0.824 | 0.201 | 4.11E-05 | -- |
| rs55668611  | 12 | 87835563  |               | A   | G                               | 0.963 | -1.031 | 0.251 | 3.89E-05 | 0.964 | -0.452 | 0.336 | 1.79E-01 | 0.964 | -0.824 | 0.201 | 4.11E-05 | -- |
| rs60791984  | 12 | 87835626  |               | A   | G<br>AC                         | 0.963 | -1.031 | 0.251 | 3.89E-05 | 0.964 | -0.452 | 0.336 | 1.79E-01 | 0.964 | -0.824 | 0.201 | 4.11E-05 | -- |
| rs140048966 | 12 | 87836867  |               | A   | TC                              | 0.963 | -1.031 | 0.251 | 3.89E-05 | 0.964 | -0.452 | 0.336 | 1.79E-01 | 0.964 | -0.824 | 0.201 | 4.11E-05 | -- |



|             |    |           |        |   |                     |       |        |       |          |       |        |       |          |       |        |       |          |    |
|-------------|----|-----------|--------|---|---------------------|-------|--------|-------|----------|-------|--------|-------|----------|-------|--------|-------|----------|----|
| rs186109742 | 5  | 99774096  |        | A | T                   | 0.989 | -1.669 | 0.409 | 4.46E-05 |       |        |       |          | 0.989 | -1.669 | 0.409 | 4.46E-05 | -? |
| rs191813690 | 5  | 99774098  |        | A | T                   | 0.989 | -1.669 | 0.409 | 4.46E-05 |       |        |       |          | 0.989 | -1.669 | 0.409 | 4.46E-05 | -? |
| rs147440771 | 6  | 3133466   | BPHL   | A | AC<br>TC<br>TT      | 0.015 | 1.475  | 0.361 | 4.47E-05 |       |        |       |          | 0.015 | 1.475  | 0.361 | 4.47E-05 | +? |
| rs77638044  | 6  | 3133481   | BPHL   | T | C                   | 0.985 | -1.475 | 0.361 | 4.47E-05 |       |        |       |          | 0.985 | -1.475 | 0.361 | 4.47E-05 | -? |
| rs7315539   | 12 | 1661143   | WNT5B  | A | G                   | 0.399 | 0.53   | 0.13  | 4.48E-05 |       |        |       |          | 0.399 | 0.53   | 0.13  | 4.48E-05 | +? |
| rs34100237  | 5  | 30875576  |        | C | G                   | 0.959 | -0.247 | 0.299 | 4.07E-01 | 0.954 | -1.238 | 0.263 | 2.51E-06 | 0.956 | -0.805 | 0.197 | 4.48E-05 | -- |
| rs12171615  | 7  | 52998078  |        | A | G                   | 0.02  | 0.836  | 0.327 | 1.07E-02 | 0.03  | 1.023  | 0.319 | 1.33E-03 | 0.025 | 0.932  | 0.228 | 4.49E-05 | ++ |
| rs73351178  | 7  | 52999310  |        | T | C                   | 0.02  | 0.836  | 0.327 | 1.07E-02 | 0.03  | 1.023  | 0.319 | 1.33E-03 | 0.025 | 0.932  | 0.228 | 4.49E-05 | ++ |
| rs4624980   | 7  | 53001604  |        | T | C                   | 0.02  | 0.836  | 0.327 | 1.07E-02 | 0.03  | 1.023  | 0.319 | 1.33E-03 | 0.025 | 0.932  | 0.228 | 4.49E-05 | ++ |
| rs13219996  | 6  | 111357686 |        | T | G                   | 0.228 | 0.39   | 0.141 | 5.62E-03 | 0.204 | 0.506  | 0.166 | 2.37E-03 | 0.218 | 0.438  | 0.107 | 4.56E-05 | ++ |
| rs142622080 | 3  | 110103953 |        | T | TA                  | 0.107 | 0.684  | 0.168 | 4.56E-05 |       |        |       |          | 0.107 | 0.684  | 0.168 | 4.56E-05 | +? |
| rs35180502  | 3  | 110104952 |        | G | GA                  | 0.107 | 0.684  | 0.168 | 4.56E-05 |       |        |       |          | 0.107 | 0.684  | 0.168 | 4.56E-05 | +? |
| rs12086129  | 1  | 97335336  |        | A | T<br>GC<br>AA<br>AA | 0.951 | -0.927 | 0.235 | 8.16E-05 | 0.951 | -0.476 | 0.302 | 1.15E-01 | 0.951 | -0.756 | 0.186 | 4.58E-05 | -- |
| rs138005861 | 1  | 97337931  |        | G | AA                  | 0.049 | 0.927  | 0.235 | 8.16E-05 | 0.049 | 0.476  | 0.302 | 1.15E-01 | 0.049 | 0.756  | 0.186 | 4.58E-05 | ++ |
| rs12096480  | 1  | 97339253  |        | A | G                   | 0.049 | 0.927  | 0.235 | 8.16E-05 | 0.049 | 0.476  | 0.302 | 1.15E-01 | 0.049 | 0.756  | 0.186 | 4.58E-05 | ++ |
| rs11165731  | 1  | 97340388  |        | A | G                   | 0.951 | -0.927 | 0.235 | 8.16E-05 | 0.951 | -0.476 | 0.302 | 1.15E-01 | 0.951 | -0.756 | 0.186 | 4.58E-05 | -- |
| rs74107605  | 1  | 97341129  |        | T | G                   | 0.951 | -0.927 | 0.235 | 8.16E-05 | 0.951 | -0.476 | 0.302 | 1.15E-01 | 0.951 | -0.756 | 0.186 | 4.58E-05 | -- |
| rs12094917  | 1  | 97341724  |        | A | C                   | 0.951 | -0.927 | 0.235 | 8.16E-05 | 0.951 | -0.476 | 0.302 | 1.15E-01 | 0.951 | -0.756 | 0.186 | 4.58E-05 | -- |
| rs6660077   | 1  | 97344882  |        | A | G                   | 0.951 | -0.927 | 0.235 | 8.16E-05 | 0.951 | -0.476 | 0.302 | 1.15E-01 | 0.951 | -0.756 | 0.186 | 4.58E-05 | -- |
| rs79741362  | 1  | 97347462  |        | A | G                   | 0.951 | -0.927 | 0.235 | 8.16E-05 | 0.951 | -0.476 | 0.302 | 1.15E-01 | 0.951 | -0.756 | 0.186 | 4.58E-05 | -- |
| rs4665554   | 2  | 23350490  |        | T | C                   | 0.452 | -0.538 | 0.132 | 4.59E-05 |       |        |       |          | 0.452 | -0.538 | 0.132 | 4.59E-05 | -? |
| rs9820608   | 3  | 124075754 | KALRN  | T | C                   | 0.357 | 0.468  | 0.135 | 5.24E-04 | 0.357 | 0.336  | 0.15  | 2.52E-02 | 0.357 | 0.409  | 0.1   | 4.59E-05 | ++ |
| rs16962894  | 16 | 84202227  | DNAAF1 | T | C                   | 0.087 | 0.33   | 0.222 | 1.36E-01 | 0.093 | 0.892  | 0.212 | 2.52E-05 | 0.09  | 0.625  | 0.153 | 4.59E-05 | ++ |
| rs11248530  | 10 | 125204321 |        | T | C                   | 0.07  | 0.36   | 0.225 | 1.09E-01 | 0.075 | 0.978  | 0.233 | 2.61E-05 | 0.072 | 0.658  | 0.162 | 4.65E-05 | ++ |
| rs10270309  | 7  | 25298283  |        | A | G                   | 0.056 | 0.584  | 0.242 | 1.58E-02 | 0.068 | 0.82   | 0.245 | 8.05E-04 | 0.062 | 0.701  | 0.172 | 4.66E-05 | ++ |
| rs75163401  | 4  | 60667036  |        | T | TA                  | 0.023 | 1.272  | 0.312 | 4.69E-05 |       |        |       |          | 0.023 | 1.272  | 0.312 | 4.69E-05 | +? |
| rs192196005 | 5  | 28515522  |        | A | G                   | 0.99  | -1.724 | 0.424 | 4.75E-05 |       |        |       |          | 0.99  | -1.724 | 0.424 | 4.75E-05 | -? |



**Table S3. Top 10 eQTLs of rs17440378 in human brain samples (aveALL) using Braineac UK database.**

| Gene Symbol   | Marker         | rsID       | exprID   | Chr | Start     | Stop      | ave ALL  | CRBL     | FCTX     | HIPP     | MEDU     | OCTX     | PUTM     | SNIG     | TCTX     | THAL     | WHM T    |
|---------------|----------------|------------|----------|-----|-----------|-----------|----------|----------|----------|----------|----------|----------|----------|----------|----------|----------|----------|
| HTR2B         | chr2:231979355 | rs17440378 | 2603401  | 2   | 231972876 | 231989824 | 7.30E-04 | 4.20E-01 | 5.40E-01 | 2.90E-01 | 7.40E-01 | 3.40E-01 | 3.70E-02 | 5.00E-04 | 1.20E-01 | 6.70E-02 | 2.80E-02 |
| HTR2B         | chr2:231979355 | rs17440378 | 2603400  | 2   | 231972876 | 231989824 | 1.10E-03 | 6.10E-01 | 4.60E-01 | 1.10E-01 | 3.60E-01 | 2.40E-01 | 6.30E-02 | 9.50E-03 | 7.30E-02 | 6.60E-01 | 7.40E-04 |
| PSMD1         | chr2:231979355 | rs17440378 | 2531767  | 2   | 231921607 | 232037527 | 4.50E-03 | 5.70E-02 | 6.30E-02 | 2.80E-01 | 9.50E-01 | 2.00E-01 | 6.00E-02 | 2.70E-02 | 1.50E-02 | 7.60E-02 | 4.00E-01 |
| DIS3L2        | chr2:231979355 | rs17440378 | 2532218  | 2   | 232825975 | 233209416 | 7.60E-03 | 5.50E-01 | 8.60E-01 | 1.90E-01 | 1.20E-01 | 2.50E-01 | 7.90E-01 | 2.20E-01 | 1.10E-01 | 5.60E-03 | 5.10E-01 |
| HTR2B         | chr2:231979355 | rs17440378 | t2603395 | 2   | 231972876 | 231989824 | 1.70E-02 | 2.70E-01 | 4.10E-01 | 3.60E-01 | 1.60E-01 | 1.20E-01 | 2.10E-02 | 5.20E-02 | 2.90E-01 | 3.50E-01 | 1.60E-02 |
| SP140, SP140L | chr2:231979355 | rs17440378 | 2531249  | 2   | 231090446 | 231177928 | 2.00E-02 | 2.80E-01 | 5.10E-02 | 1.10E-02 | 7.60E-01 | 4.70E-01 | 8.00E-01 | 1.20E-02 | 8.60E-01 | 5.20E-02 | 9.70E-02 |
| B3GNT7        | chr2:231979355 | rs17440378 | 2531915  | 2   | 232259841 | 232273503 | 2.70E-02 | 4.30E-02 | 8.90E-01 | 4.00E-01 | 3.70E-01 | 2.80E-01 | 5.30E-01 | 2.80E-01 | 8.70E-01 | 4.60E-01 | 8.70E-01 |
| HTR2B         | chr2:231979355 | rs17440378 | 2603398  | 2   | 231972876 | 231989824 | 3.80E-02 | 9.70E-01 | 9.90E-01 | 1.60E-01 | 8.20E-01 | 2.70E-01 | 2.90E-02 | 9.80E-02 | 3.00E-01 | 6.50E-01 | 2.50E-03 |
| HTR2B         | chr2:231979355 | rs17440378 | 2603403  | 2   | 231972876 | 231989824 | 3.80E-02 | 4.40E-01 | 6.50E-02 | 4.80E-01 | 1.70E-01 | 1.90E-01 | 5.20E-01 | 2.80E-01 | 9.30E-01 | 3.60E-01 | 2.00E-02 |

**Table S4. eQTLs of rs17440378 in human brain samples using GTEx database.**

| <b>Gencode Id</b>  | <b>Gene Symbol</b> | <b>SNP Id</b> | <b>P-Value</b> | <b>Effect Size</b> | <b>Tissue</b>                         |
|--------------------|--------------------|---------------|----------------|--------------------|---------------------------------------|
| ENSG00000204128.5  | C2orf72            | rs17440378    | 3.80E-18       | 1                  | Thyroid                               |
| ENSG00000204128.5  | C2orf72            | rs17440378    | 1.70E-13       | 0.96               | Esophagus - Muscularis                |
| ENSG00000135931.13 | ARMC9              | rs17440378    | 2.30E-11       | 0.61               | Artery - Aorta                        |
| ENSG00000261829.1  | RP11-223I10.1      | rs17440378    | 7.40E-11       | 0.73               | Thyroid                               |
| ENSG00000135931.13 | ARMC9              | rs17440378    | 6.40E-09       | 0.34               | Artery - Tibial                       |
| ENSG00000135914.5  | HTR2B              | rs17440378    | 1.20E-08       | 0.56               | Esophagus - Muscularis                |
| ENSG00000135931.13 | ARMC9              | rs17440378    | 7.20E-07       | 0.5                | Pancreas                              |
| ENSG00000204128.5  | C2orf72            | rs17440378    | 0.000001       | 0.54               | Adipose - Subcutaneous                |
| ENSG00000204128.5  | C2orf72            | rs17440378    | 0.0000016      | 0.73               | Esophagus - Gastroesophageal Junction |
| ENSG00000204128.5  | C2orf72            | rs17440378    | 0.0000018      | 0.32               | Stomach                               |
| ENSG00000135914.5  | HTR2B              | rs17440378    | 0.0000048      | 0.42               | Lung                                  |
| ENSG00000135914.5  | HTR2B              | rs17440378    | 0.0000063      | 0.51               | Esophagus - Gastroesophageal Junction |
| ENSG00000204128.5  | C2orf72            | rs17440378    | 0.0000064      | 0.27               | Colon - Transverse                    |
| ENSG00000204128.5  | C2orf72            | rs17440378    | 0.0000083      | 0.65               | Adipose - Visceral (Omentum)          |
| ENSG00000224376.1  | AC017104.6         | rs17440378    | 0.0000094      | 0.49               | Artery - Aorta                        |
| ENSG00000204128.5  | C2orf72            | rs17440378    | 0.000015       | 0.3                | Skin - Sun Exposed (Lower leg)        |
| ENSG00000204128.5  | C2orf72            | rs17440378    | 0.000016       | 0.39               | Lung                                  |
| ENSG00000156966.6  | B3GNT7             | rs17440378    | 0.000027       | -0.28              | Colon - Transverse                    |
| ENSG00000135914.5  | HTR2B              | rs17440378    | 0.000038       | 0.56               | Artery - Aorta                        |



**Table S5. Histone marks for 17440378 using HaploReg v4.1 database.**

| Epigenome ID (EID) | Group      | Description                                            | Chromatin states (15-S) | Chromatin states (25-S) | H3K4me1        | H3K4me3 | H3K27ac        | H3K9ac        |
|--------------------|------------|--------------------------------------------------------|-------------------------|-------------------------|----------------|---------|----------------|---------------|
| E017               | IMR90      | IMR90 fetal lung fibroblasts Cell Line                 |                         |                         | H3K4me1<br>Enh |         |                |               |
| E002               | ESC        | ES-WA7 Cells                                           |                         | 17_EnhW2                | H3K4me1<br>Enh |         |                |               |
| E001               | ESC        | ES-I3 Cells                                            |                         |                         | H3K4me1<br>Enh |         |                |               |
| E015               | ESC        | HUES6 Cells                                            |                         | 17_EnhW2                | H3K4me1<br>Enh |         | H3K27ac<br>Enh |               |
| E014               | ESC        | HUES48 Cells                                           | 7_Enh                   | 17_EnhW2                | H3K4me1<br>Enh |         | H3K27ac<br>Enh |               |
| E016               | ESC        | HUES64 Cells                                           | 7_Enh                   | 17_EnhW2                | H3K4me1<br>Enh |         | H3K27ac<br>Enh |               |
| E003               | ESC        | H1 Cells                                               |                         |                         | H3K4me1<br>Enh |         | H3K27ac<br>Enh |               |
| E024               | ESC        | ES-UCSF4 Cells                                         |                         |                         | H3K4me1<br>Enh |         |                |               |
| E020               | iPSC       | iPS-20b Cells                                          | 7_Enh                   |                         | H3K4me1<br>Enh |         |                | H3K9ac<br>Pro |
| E019               | iPSC       | iPS-18 Cells                                           |                         |                         | H3K4me1<br>Enh |         |                |               |
| E018               | iPSC       | iPS-15b Cells                                          |                         | 17_EnhW2                | H3K4me1<br>Enh |         |                |               |
| E013               | ES-deriv   | hESC Derived CD56+ Mesoderm Cultured Cells             |                         |                         |                |         | H3K27ac<br>Enh |               |
| E025               | Mesench    | Adipose Derived Mesenchymal Stem Cell Cultured Cells   |                         |                         | H3K4me1<br>Enh |         |                | H3K9ac<br>Pro |
| E023               | Mesench    | Mesenchymal Stem Cell Derived Adipocyte Cultured Cells |                         |                         | H3K4me1<br>Enh |         |                |               |
| E055               | Epithelial | Foreskin Fibroblast Primary Cells skin01               |                         |                         | H3K4me1<br>Enh |         |                |               |
| E061               | Epithelial | Foreskin Melanocyte Primary Cells skin03               |                         |                         | H3K4me1<br>Enh |         |                |               |
| E068               | Brain      | Brain Anterior Caudate                                 |                         |                         |                |         |                | H3K9ac<br>Pro |
| E069               | Brain      | Brain Cingulate Gyrus                                  |                         |                         | H3K4me1<br>Enh |         |                |               |
| E063               | Adipose    | Adipose Nuclei                                         |                         |                         |                |         |                | H3K9ac<br>Pro |
| E078               | Sm. Muscle | Duodenum Smooth Muscle                                 |                         |                         |                |         | H3K27ac<br>Enh |               |
| E076               | Sm.        | Colon Smooth                                           |                         |                         | H3K4me1        |         | H3K27          |               |

|      |             |                                            |  |  |             |             |             |            |
|------|-------------|--------------------------------------------|--|--|-------------|-------------|-------------|------------|
|      | Muscle      | Muscle                                     |  |  | _Enh        |             | ac_Enh      |            |
| E103 | Sm. Muscle  | Rectal Smooth Muscle                       |  |  | H3K4me1_Enh |             | H3K27ac_Enh |            |
| E086 | Other       | Fetal Kidney                               |  |  | H3K4me1_Enh | H3K4me3_Pro |             | H3K9ac_Pro |
| E088 | Other       | Fetal Lung                                 |  |  |             |             |             | H3K9ac_Pro |
| E087 | Other       | Pancreatic Islets                          |  |  | H3K4me1_Enh |             |             |            |
| E114 | ENCODE 2012 | A549 EtOH 0.02pct Lung Carcinoma Cell Line |  |  | H3K4me1_Enh |             |             |            |
| E119 | ENCODE 2012 | HMEC Mammary Epithelial Primary Cells      |  |  |             |             |             | H3K9ac_Pro |
| E128 | ENCODE 2012 | NHLF Lung Fibroblast Primary Cells         |  |  | H3K4me1_Enh |             |             |            |

**Table S6. Regulatory motifs of rs17440378 using HaploReg v4.1 database.****A. rs17440378**

| Position Weight Matrix ID                  |        |      |      |
|--------------------------------------------|--------|------|------|
| (Library from Kheradpour and Kellis, 2013) | Strand | Ref  | Alt  |
| Gfi1_1                                     | +      | 12.1 | 11.6 |
| Nkx2_6                                     | +      | 9.8  | 11.6 |
| Nkx3_4                                     | +      | 12.2 | 11.8 |

**B. rs55637820**

| Position Weight Matrix ID                  |        |      |      |
|--------------------------------------------|--------|------|------|
| (Library from Kheradpour and Kellis, 2013) | Strand | Ref  | Alt  |
| Egr-1_disc2                                | +      | 12.9 | 0.9  |
| Ets_known3                                 | -      | 13   | 1    |
| GATA_disc3                                 | +      | 13.2 | 5.3  |
| GATA_known8                                | -      | 1.4  | 13.3 |
| Irf_disc5                                  | -      | 13   | 1    |
| Nrf-2_1                                    | -      | 14.2 | 2.2  |
| PU.1_disc3                                 | -      | 12.8 | 0.8  |
| Pax-5_disc4                                | +      | 13.8 | 10   |
| Rad21_disc5                                | -      | 11.5 | 0.5  |
| Rad21_disc6                                | -      | 11   | 0.3  |
| SP1_disc3                                  | -      | 15.5 | 11.9 |

**C. rs35750632**

| Position Weight Matrix ID                  |        |       |      |
|--------------------------------------------|--------|-------|------|
| (Library from Kheradpour and Kellis, 2013) | Strand | Ref   | Alt  |
| AP-1_disc10                                | +      | 0     | 11.5 |
| Glis2                                      | -      | 11.7  | 12.6 |
| MAZR                                       | +      | 7.8   | 18.9 |
| NF-I_1                                     | +      | 4.1   | 12.3 |
| RREB-1_2                                   | -      | -1.7  | 1.8  |
| SP1_known1                                 | +      | 9.3   | 11.4 |
| UF1H3BETA                                  | +      | -13.8 | -1.9 |
| WT1                                        | -      | 7.3   | 11.2 |
| ZBTB7A_known2                              | -      | 14.1  | 13.3 |
| ZNF219                                     | -      | 9.8   | 11.6 |

|        |   |      |      |
|--------|---|------|------|
| Zfp281 | - | 9.3  | 12.9 |
| Zfp740 | - | 13.4 | 13.1 |

**Table S7. Polygenic risk score (PRS) results for extraversion and cannabis-related aggression**

| PT           | Yale Penn 1 |              |             |                 | Yale Penn 2 |              |             |                 | Meta      |              |             |                 |
|--------------|-------------|--------------|-------------|-----------------|-------------|--------------|-------------|-----------------|-----------|--------------|-------------|-----------------|
|              | #SNPs       | Beta         | SE          | P-value         | #SNPs       | Beta         | SE          | P-value         | Direction | Beta         | SE          | P-value         |
| 0.00001      | 5           | 0.210        | 0.29        | 4.74E-01        | 4           | 0.044        | 0.36        | 9.03E-01        | ++        | 0.144        | 0.23        | 5.28E-01        |
| 0.0001       | 19          | 0.224        | 0.29        | 4.40E-01        | 14          | 0.480        | 0.41        | 2.37E-01        | ++        | 0.312        | 0.24        | 1.88E-01        |
| <b>0.001</b> | <b>1366</b> | <b>0.713</b> | <b>0.32</b> | <b>2.51E-02</b> | <b>863</b>  | <b>0.603</b> | <b>0.37</b> | <b>1.02E-01</b> | ++        | <b>0.666</b> | <b>0.24</b> | <b>5.63E-03</b> |
| <b>0.005</b> | <b>5313</b> | <b>0.708</b> | <b>0.32</b> | <b>2.59E-02</b> | <b>3111</b> | <b>0.424</b> | <b>0.36</b> | <b>2.33E-01</b> | ++        | <b>0.582</b> | <b>0.24</b> | <b>1.40E-02</b> |
| 0.01         | 9470        | 0.382        | 0.33        | 2.42E-01        | 5406        | 0.392        | 0.35        | 2.60E-01        | ++        | 0.387        | 0.24        | 1.04E-01        |
| 0.05         | 35173       | 0.399        | 0.27        | 1.38E-01        | 19139       | 0.077        | 0.36        | 8.30E-01        | ++        | 0.284        | 0.22        | 1.88E-01        |
| 0.1          | 60510       | 0.267        | 0.28        | 3.39E-01        | 32152       | -0.095       | 0.35        | 7.86E-01        | + -       | 0.127        | 0.22        | 5.63E-01        |
| 0.5          | 182633      | 0.249        | 0.29        | 3.83E-01        | 89487       | -0.308       | 0.36        | 3.87E-01        | + -       | 0.032        | 0.22        | 8.87E-01        |
